# Supplementary material for: Manipulating Estrogenic/Anti-Estrogenic Activity of Triphenylethylenes towards Development of Novel Anti-Neoplastic SERMs
Source: MDPI journal article supplement (doi:10.3390/ijms222212575), 2021-11-22

## **Manipulating Estrogenic/Anti-Estrogenic Activity Of Triphenylethylenes Towards Development Of Novel Anti-Neoplastic SERMs**

Heba E. Elnakib<sup>1</sup>, Marian M. Ramsis<sup>1</sup>, Nouran O. Albably<sup>1</sup>, Merna A. Vector<sup>1</sup>, Jan J. Weigand<sup>2</sup>, Kai Schwedtmann<sup>2</sup>, Jannette Wober<sup>3</sup>, Oliver Zierau<sup>3</sup>, Günter Vollmer<sup>3</sup>, Ashraf H. Abadi<sup>1</sup>, Nermin S. Ahmed<sup>1</sup>

The first three authors contributed equally to this work.

<sup>1</sup>Faculty of Pharmacy and Biotechnology, Department of Pharmaceutical Chemistry, German University in Cairo, Cairo, Egypt.

<sup>2</sup>Faculty of Chemistry and Food Chemistry, Institute of Inorganic Molecular Chemistry, Technische Universität Dresden, 01062 Dresden, Germany.

<sup>3</sup>Faculty of Biology, Institute of Zoology, Technische Universität Dresden, 01062 Dresden, Germany.

\*Correspondence: Assoc. Prof. Nermin S. Ahmed, Faculty of Pharmacy and Biotechnology, Department of Pharmaceutical Chemistry, German University in Cairo, 11835 Cairo, Egypt. Email: nermin.salah@guc.edu.eg

## Contents

|                                                                                                                                                                                                                                                                                                                                                                                                                                       |    |
|---------------------------------------------------------------------------------------------------------------------------------------------------------------------------------------------------------------------------------------------------------------------------------------------------------------------------------------------------------------------------------------------------------------------------------------|----|
| 1. Compounds characterization .....                                                                                                                                                                                                                                                                                                                                                                                                   | 3  |
| 2. Dose response curves for to determine EC <sub>50</sub> values (agonistic activity) of selected compounds in YES assay, results of AlkP and uterotrophic assays .....                                                                                                                                                                                                                                                               | 48 |
| <b>Figure S1:</b> Relative $\beta$ -galactosidase activity of selected compounds after two days treatment in YES assay. DMSO was used as solvent control and set to 1, mean $\pm$ SD were calculated by three independent experiments. ....                                                                                                                                                                                           | 48 |
| <b>Table S1:</b> Relative Alkaline phosphatase activity (AlkP) after an incubation of 72 h in Ishikawa cells, compounds are tested at a concentration of 1 $\mu$ M.....                                                                                                                                                                                                                                                               | 49 |
| <b>Figure S2:</b> Relative Alkaline phosphatase activity (AlkP) for compounds <b>5</b> , <b>11</b> , <b>12</b> , <b>19</b> after three days treatment in human endometrial adenocarcinoma Ishikawa cells. DMSO was used as solvent control and set to 1, mean $\pm$ SD were calculated by three independent experiments. Tam and 4-OH-Tam (1 $\mu$ M) were tested for comparison. * $p < 0.05$ versus DMSO control (Tukey test) ..... | 50 |
| <b>Figure S3:</b> Relative uterus wet weight following a three days treatment of ovariectomized rats (vehicle = control) with E2 (10 $\mu$ g/kg BW/ day), TAM (10 mg/kg BW/ day), compound <b>12</b> (10 mg/kg BW/ day), and compound <b>19</b> (10 mg/kg BW/ day). * $p < 0.05$ versus control (Tukey test)                                                                                                                          | 51 |
| <b>Figure S4:</b> DTP log (GI <sub>50</sub> , TGI, LC <sub>50</sub> ) $\mu$ M TAM (NSC 180973) .....                                                                                                                                                                                                                                                                                                                                  | 52 |
| <b>Figure S5:</b> Dose response curves compound 11 on different subpanels ( $\mu$ M).....                                                                                                                                                                                                                                                                                                                                             | 53 |
| <b>Figure S6:</b> Dose response curves compound 12 on different subpanels ( $\mu$ M).....                                                                                                                                                                                                                                                                                                                                             | 54 |
| <b>Figure S7:</b> Dose response curves compound 16 on different subpanels ( $\mu$ M).....                                                                                                                                                                                                                                                                                                                                             | 55 |
| <b>Figure S8:</b> Dose response curves compound 17 on different subpanels ( $\mu$ M).....                                                                                                                                                                                                                                                                                                                                             | 56 |
| <b>Figure S9:</b> Dose response curves compound 19 on different subpanels ( $\mu$ M).....                                                                                                                                                                                                                                                                                                                                             | 57 |
| <b>Figure S10:</b> Dose response curves compound 19 on different subpanels ( $\mu$ M).....                                                                                                                                                                                                                                                                                                                                            | 58 |

1. Compounds characterization  
LC-MS /  $^1\text{H}$ -NMR and  $^{13}\text{C}$ -NMR

*E/Z*-4-[1-(4-Chloro-phenyl)-2-phenylpropenyl]-phenol (1)

30-May-2017

MT23 Sm (SG, 2x2)

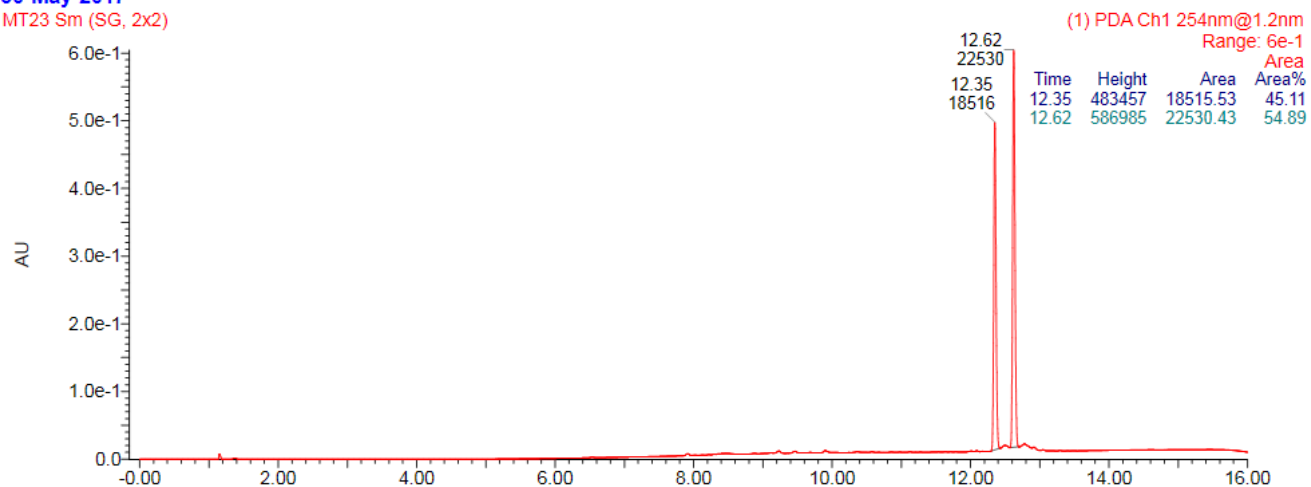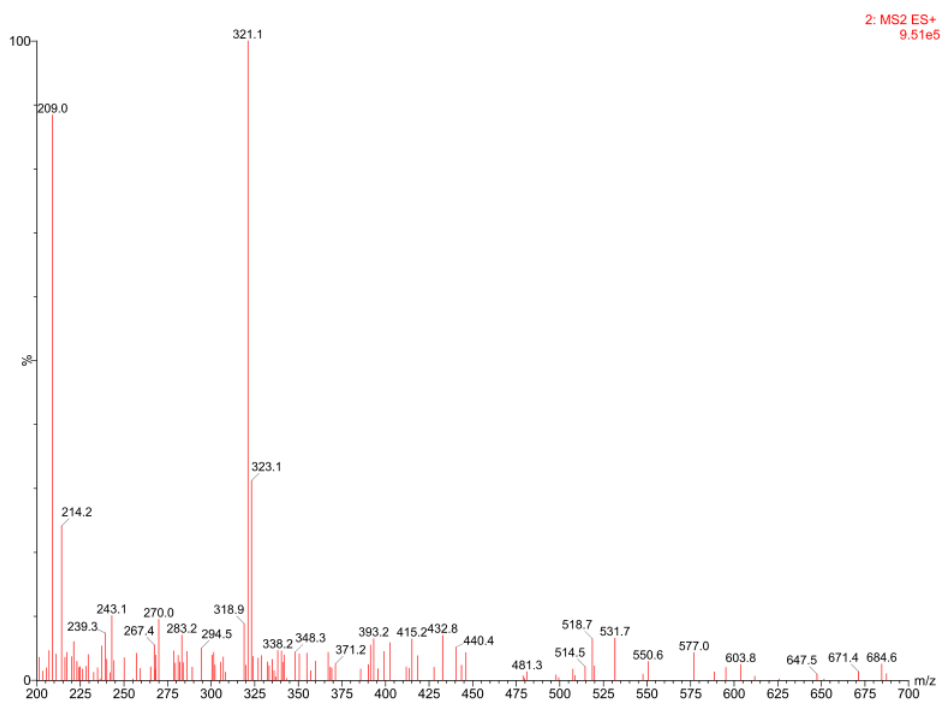

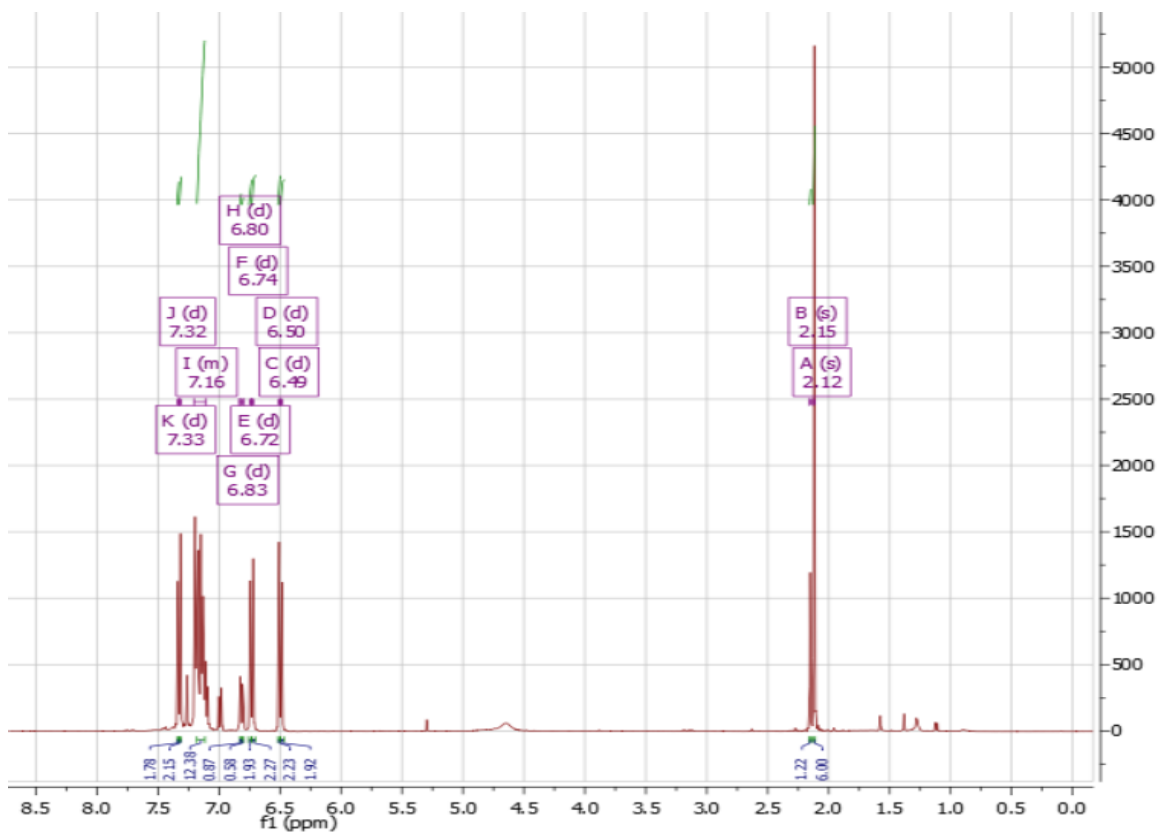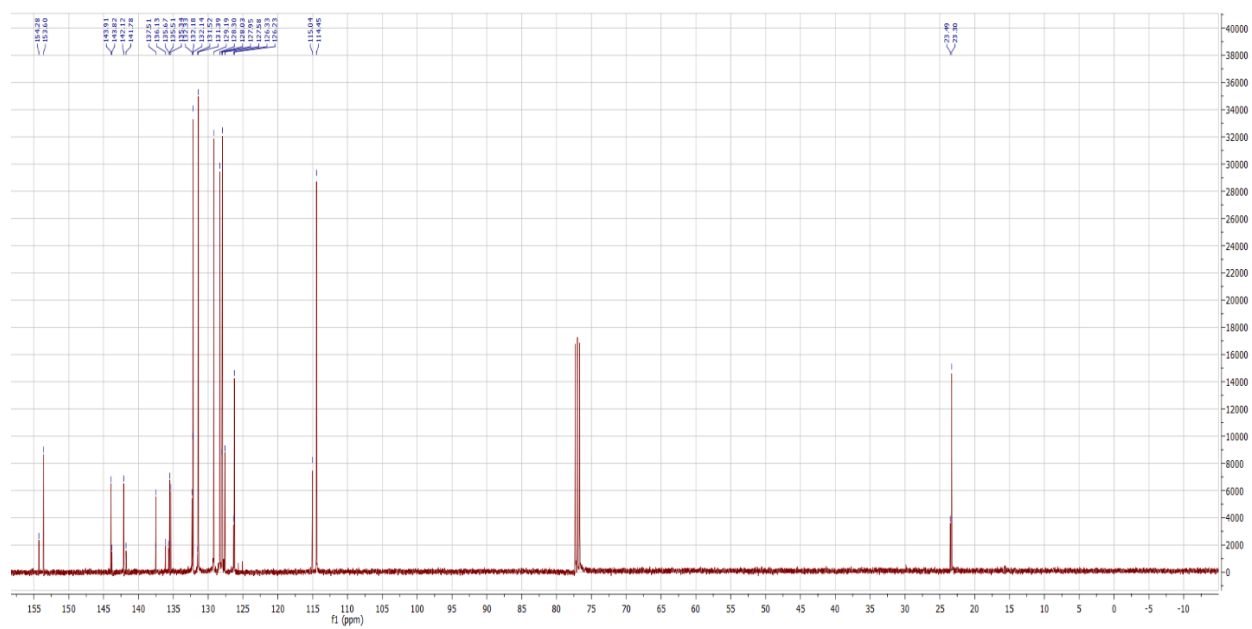

*E/Z*-4-[1-(4-Chloro-phenyl)-2-(4-methoxy-phenyl)-propenyl]-phenol (2)

04-Mar-2017

MT22 Sm (SG, 2x2)

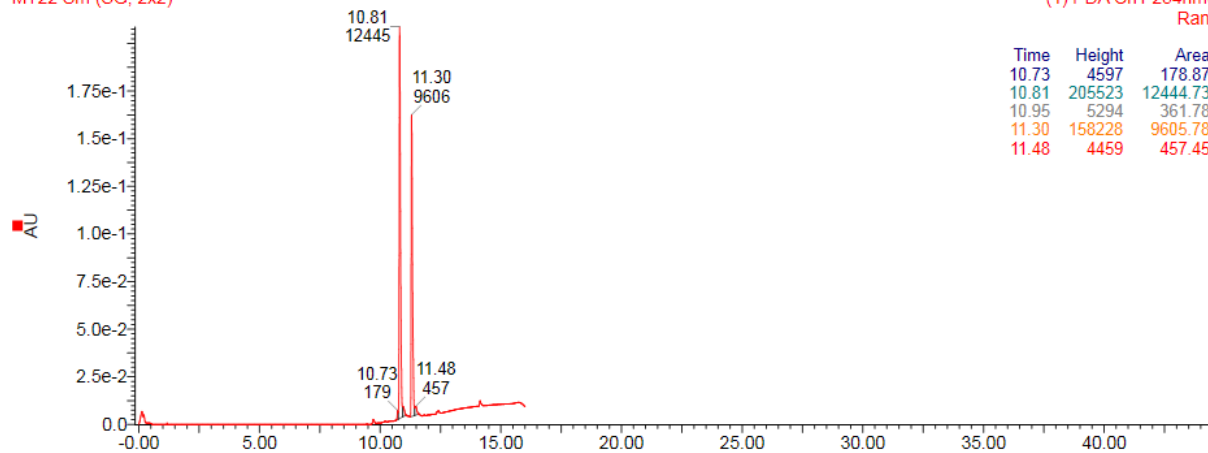

(1) PDA Ch1 254nm@1.2nm

Range: 2e-1

| Time  | Height | Area     | Area% |
|-------|--------|----------|-------|
| 10.73 | 4597   | 178.87   | 0.78  |
| 10.81 | 205523 | 12444.73 | 53.99 |
| 10.95 | 5294   | 361.78   | 1.57  |
| 11.30 | 158228 | 9605.78  | 41.68 |
| 11.48 | 4459   | 457.45   | 1.98  |

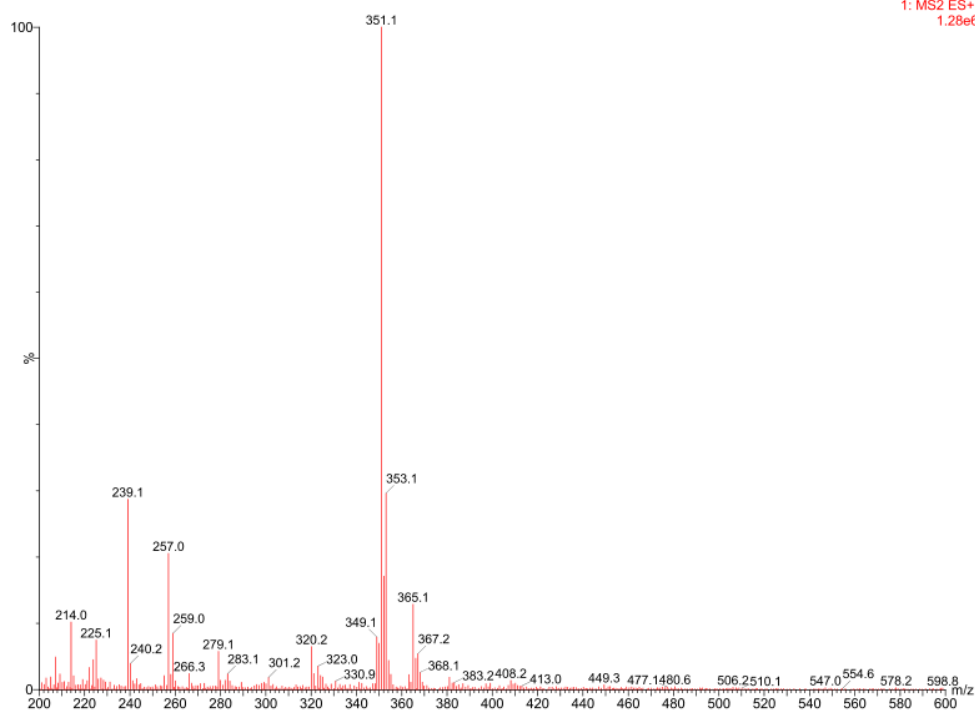

1: MS2 ES+  
1.28e6

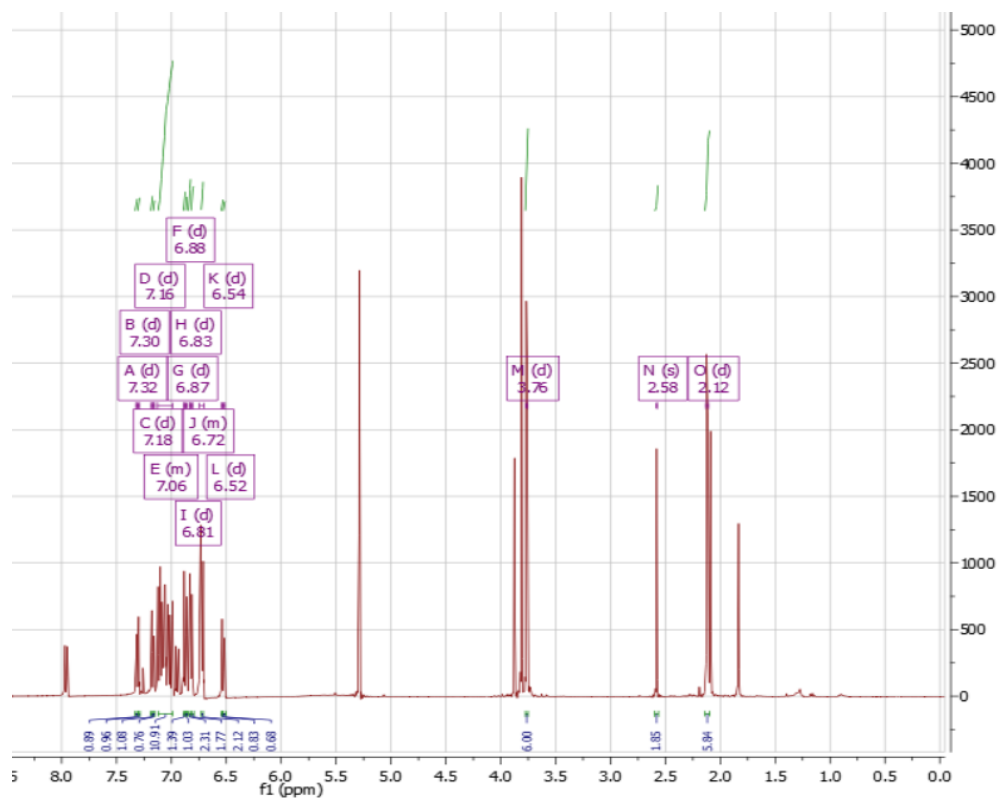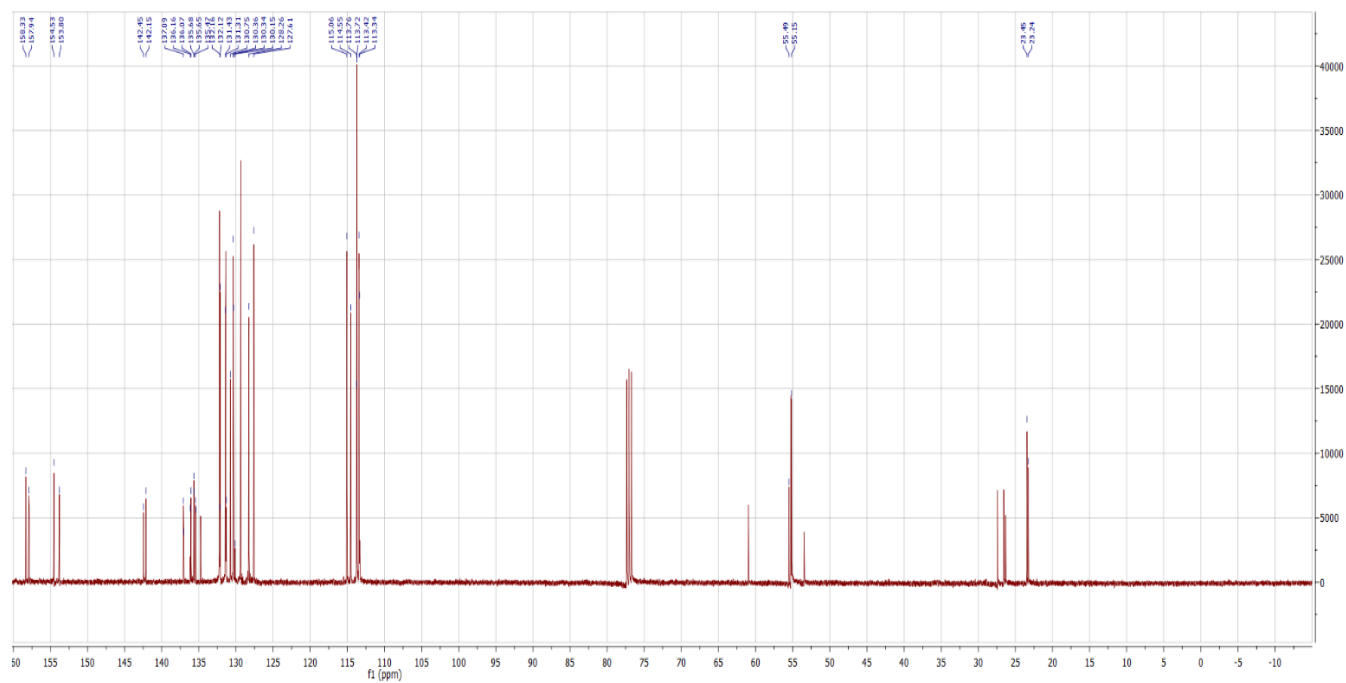

***E/Z*-4-[1-(4-Chlorophenyl)-2-(4-fluoro-3-methoxyphenyl) propenyl]-phenol (4)**

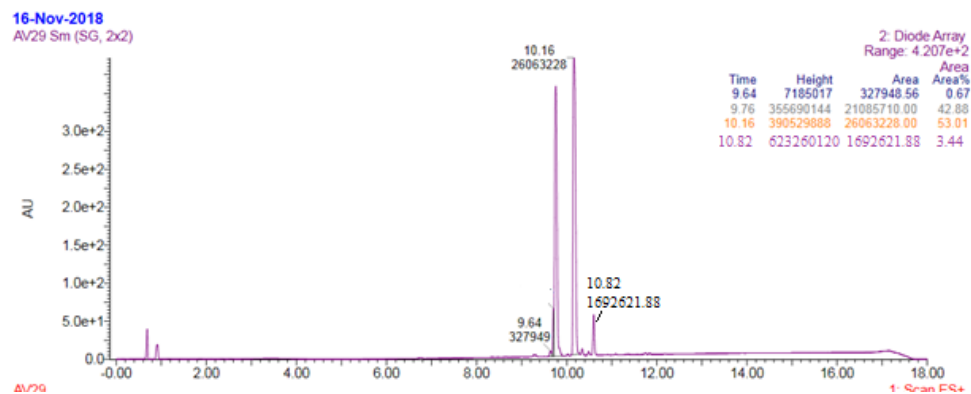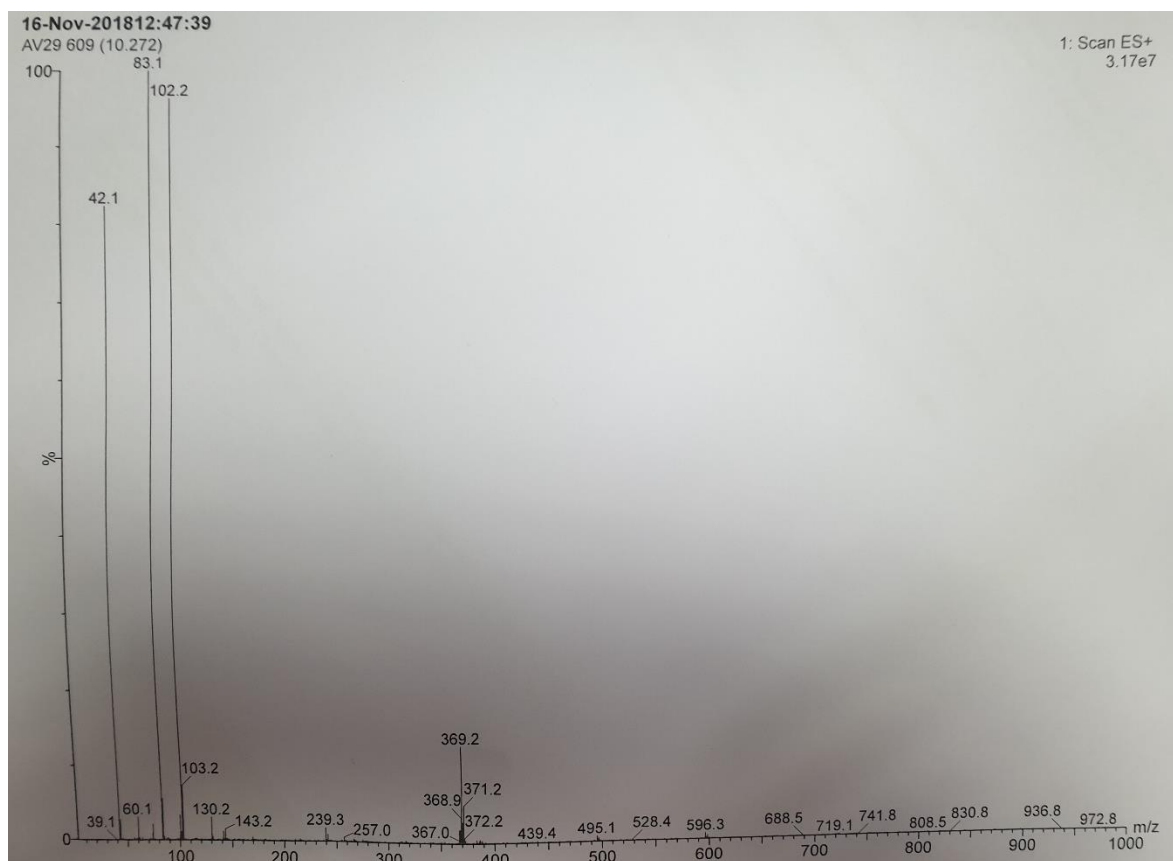

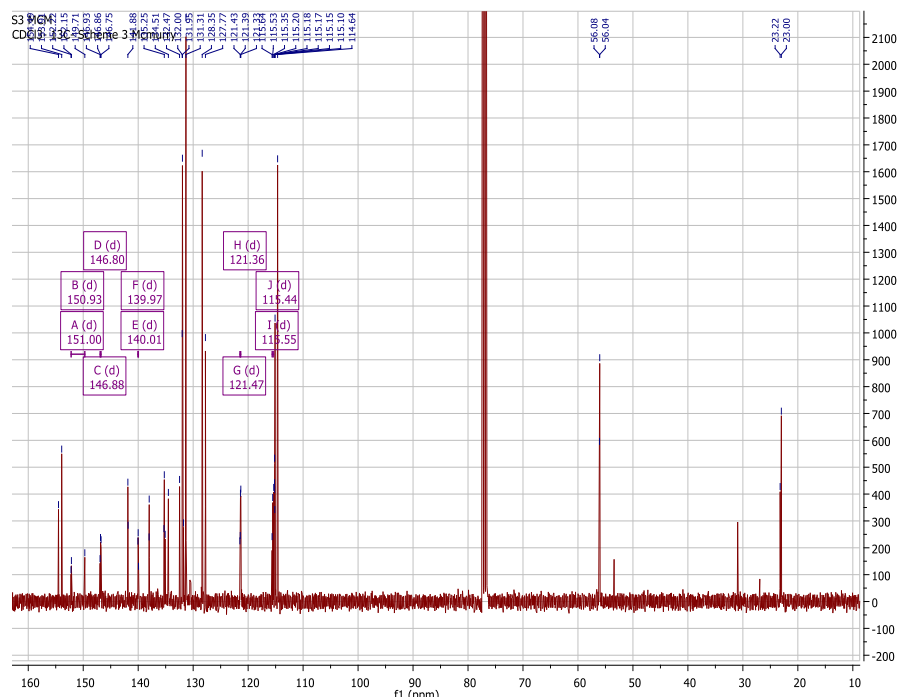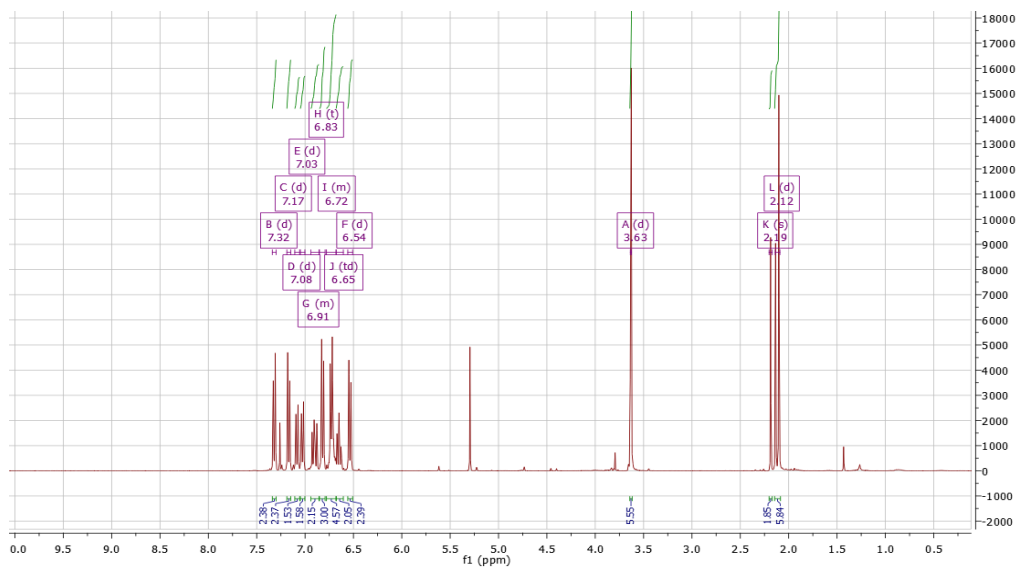

*E/Z*-1-(2-{4-[1-(4-Chloro-phenyl)-2-phenyl-propenyl]-phenoxy}-ethyl)-pyrrolidine (6).



21-Jun-2017

MT12 Sm (SG, 2x2)

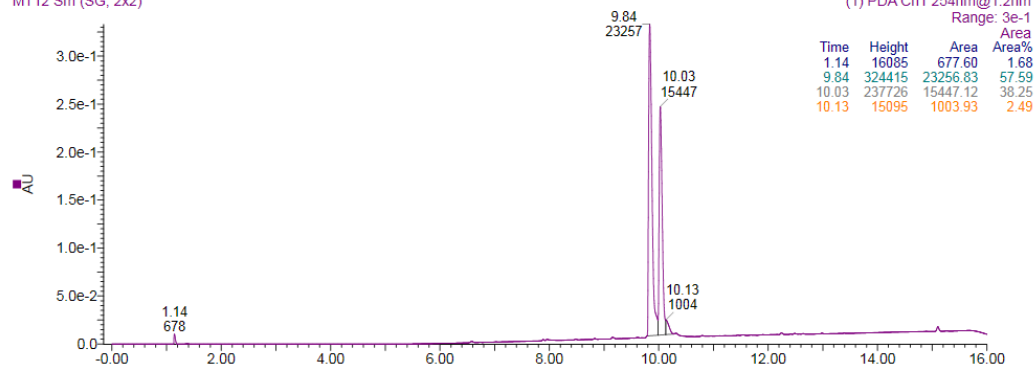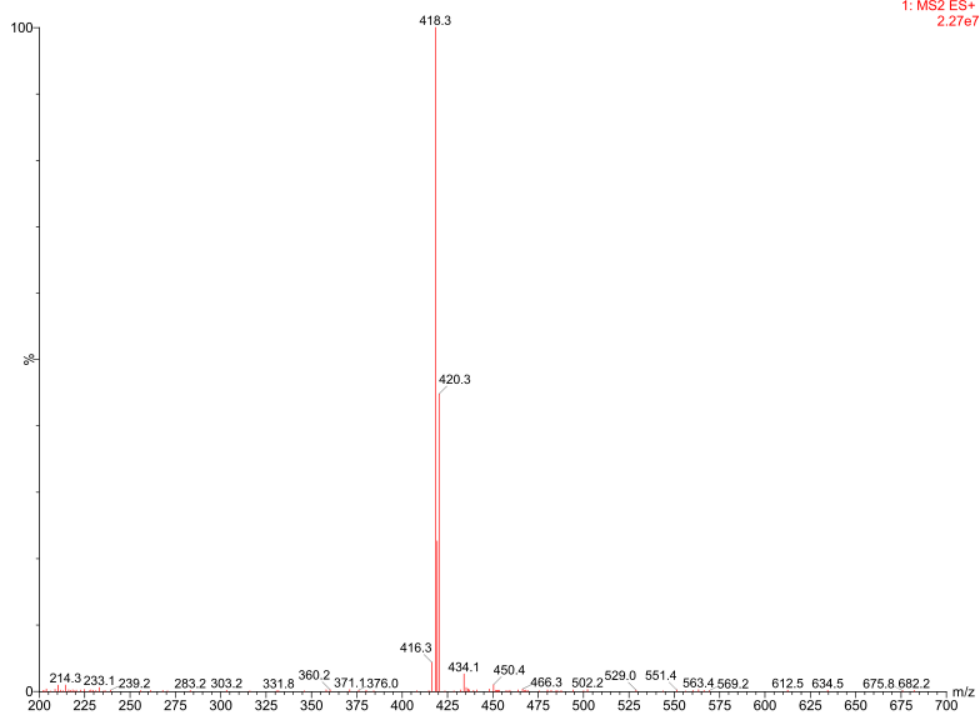

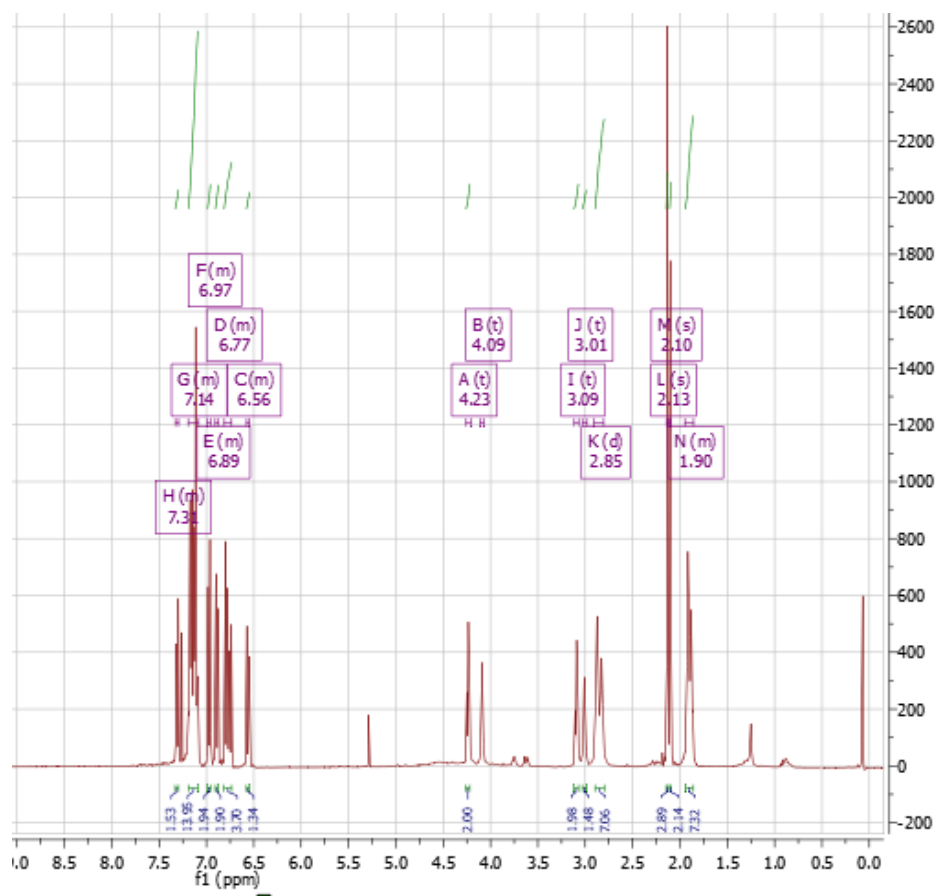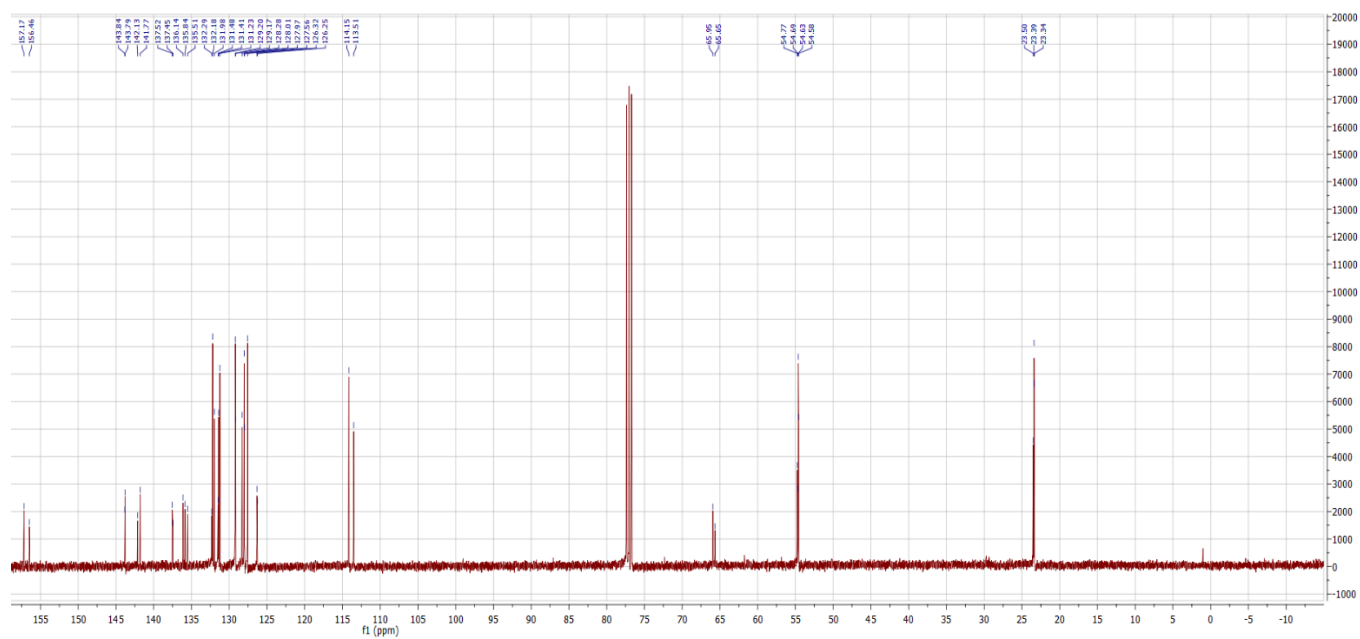

***E/Z*-1-(2-{4-[1-(4-Chloro-phenyl)-2-phenyl-propenyl]-phenoxy}-ethyl)-piperidine (7)**

21-Jun-2017

MT11 Sm (SG, 2x2)

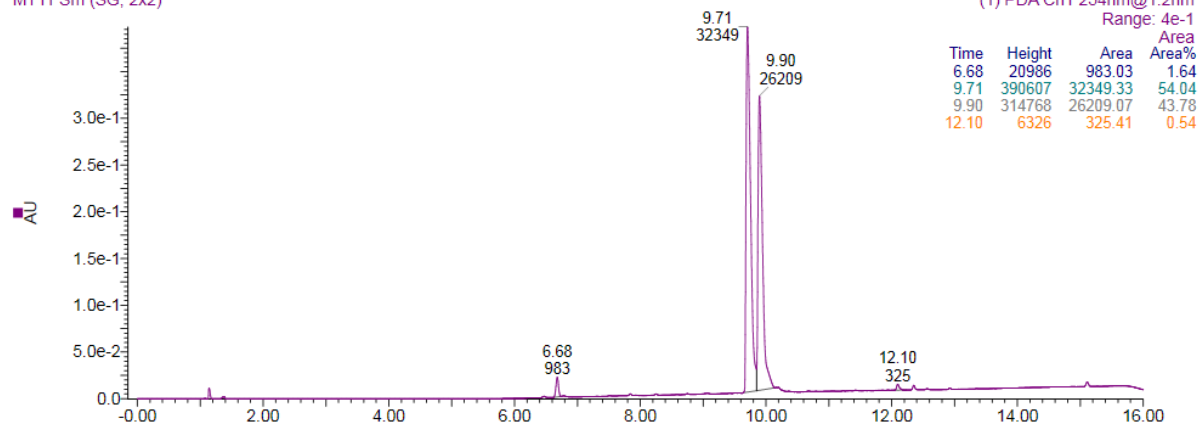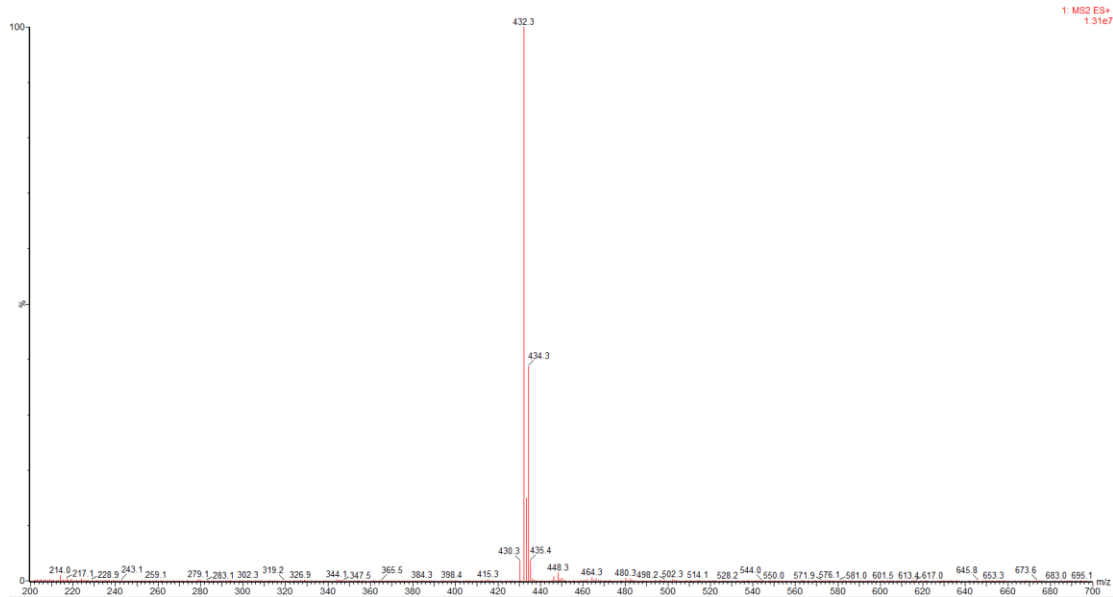

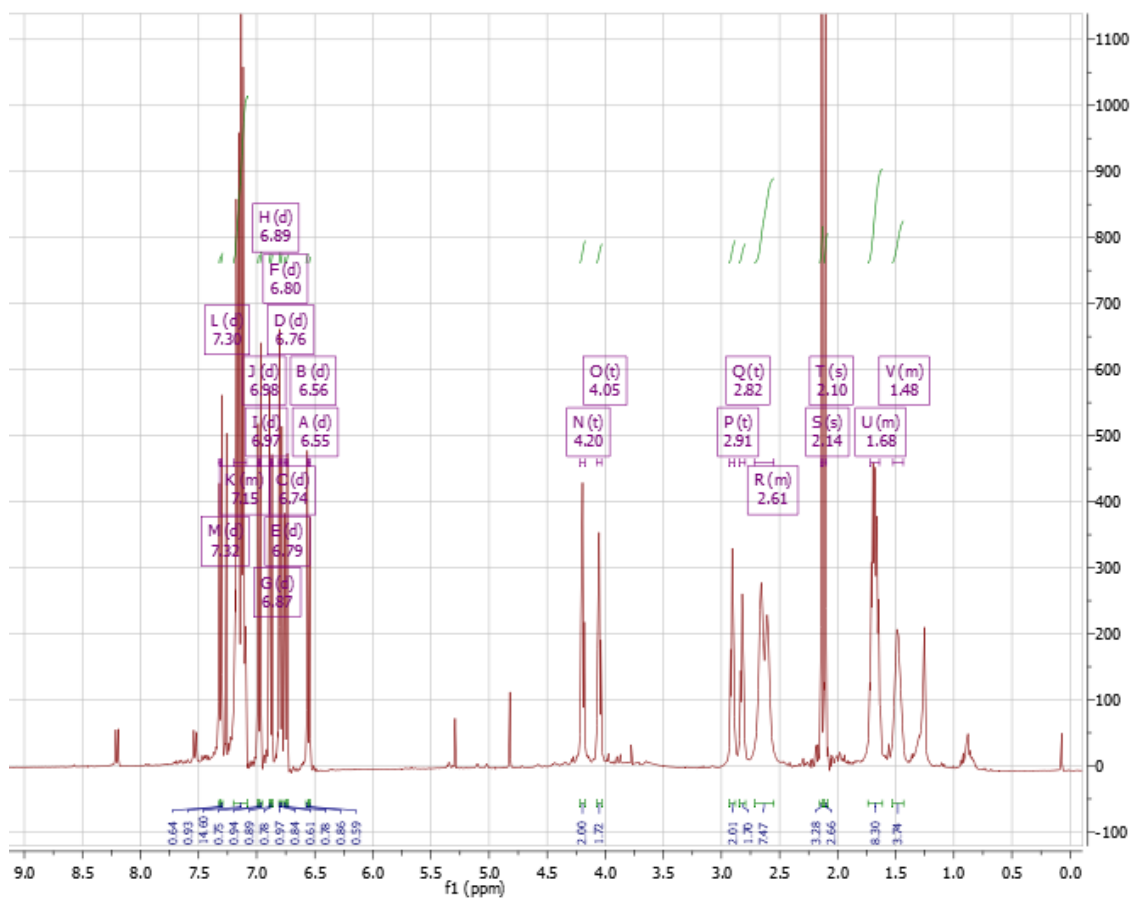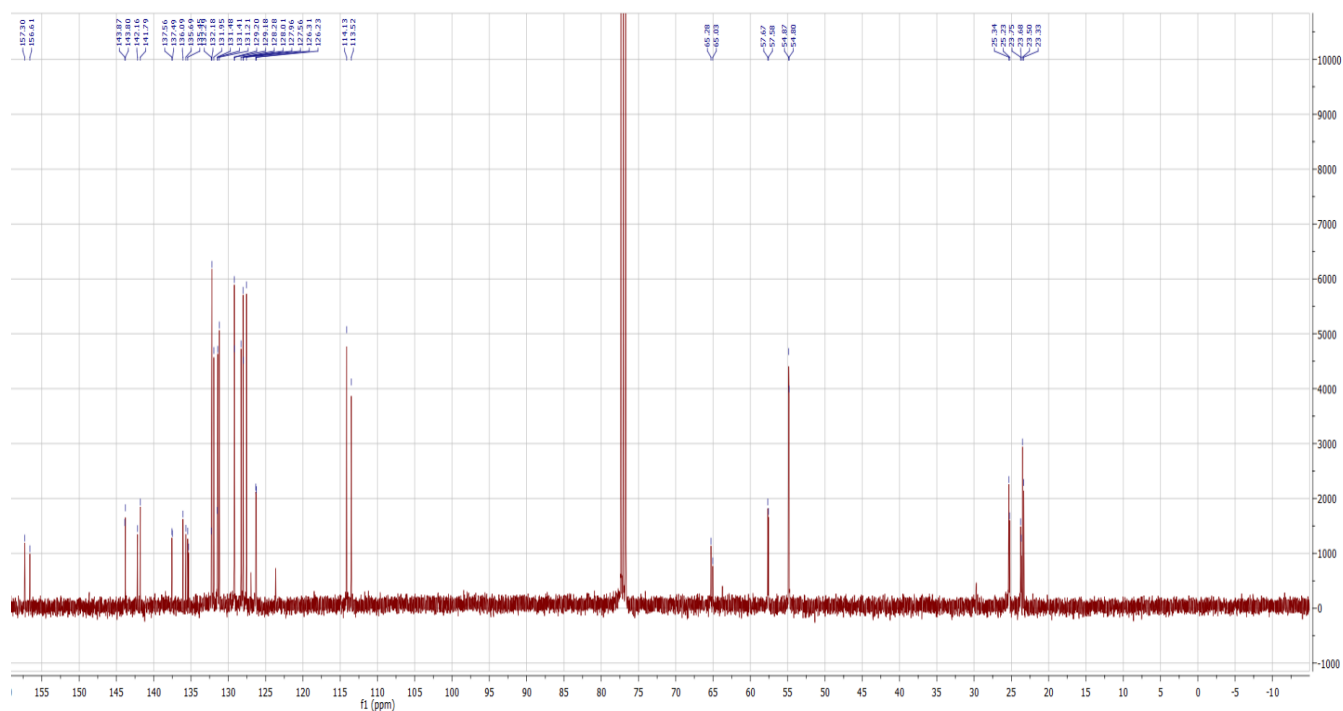

***E/Z*-4-(2-{4-[1-(4-Chloro-phenyl)-2-phenyl-propenyl]-phenoxy}-ethyl)-morpholine (8).**

09-Jul-2017

MT15 Sm (SG, 2x2)

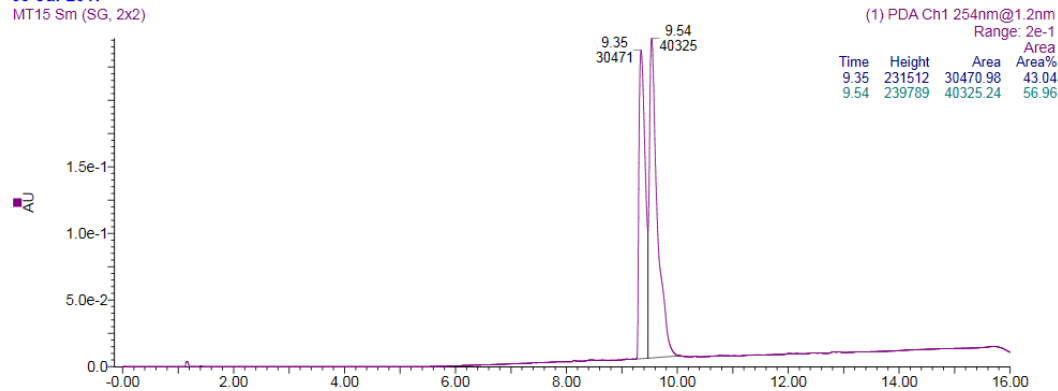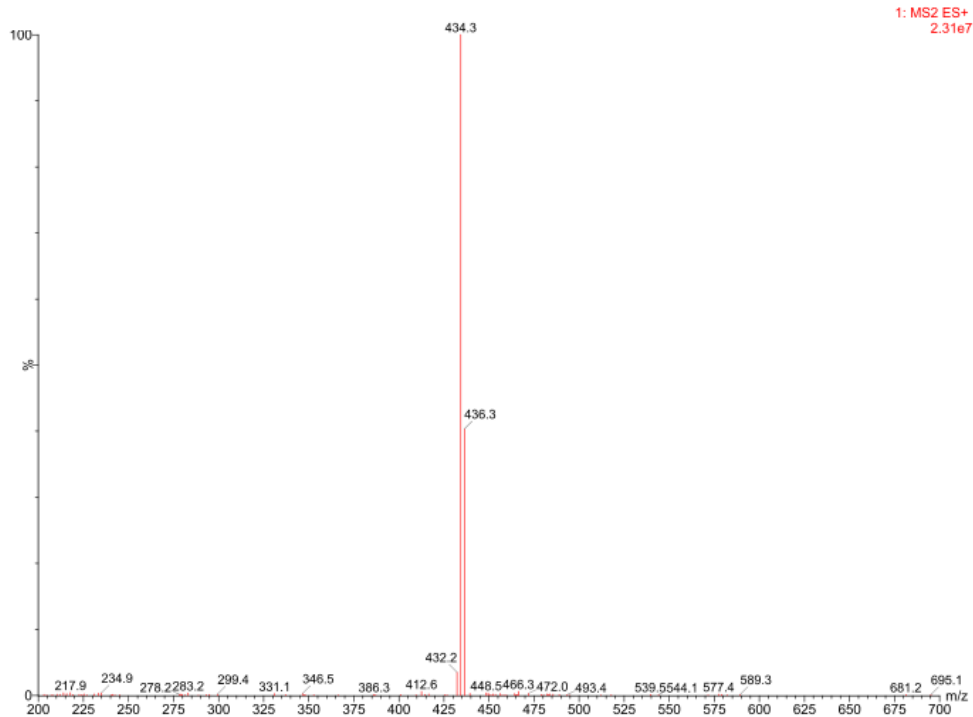

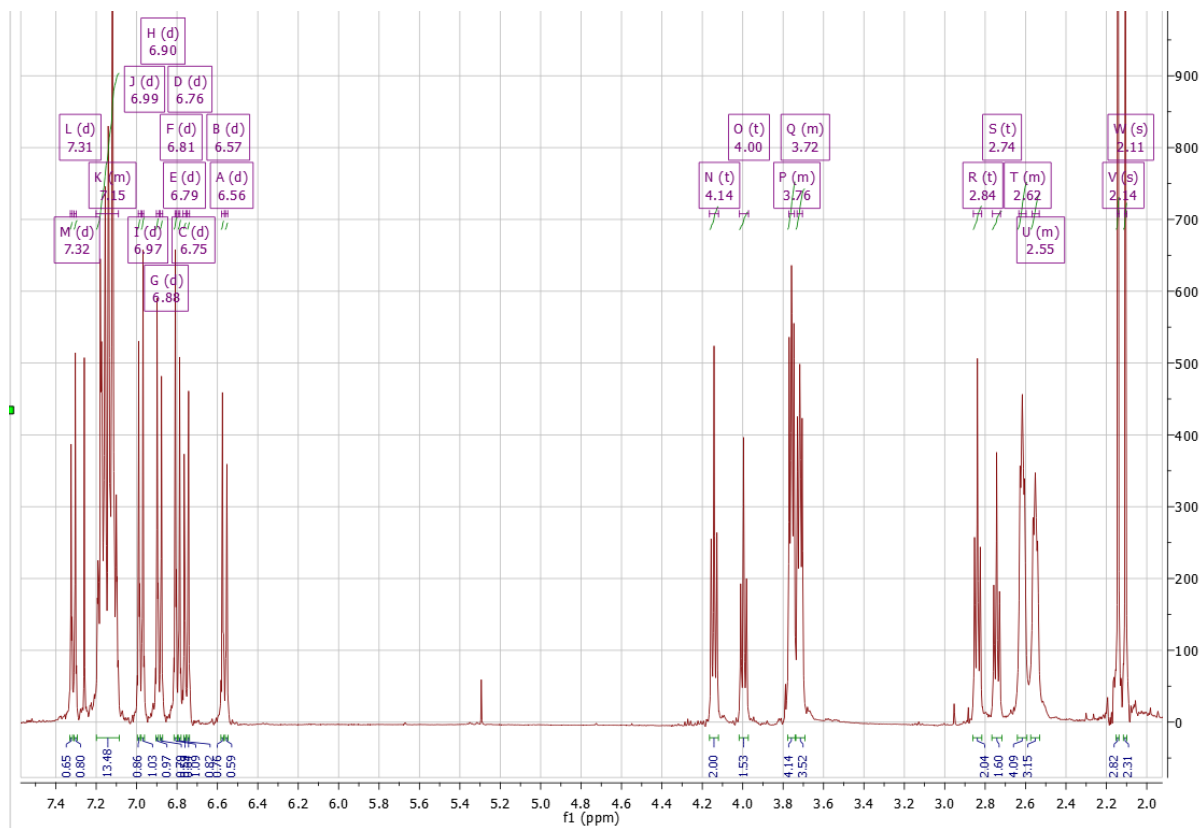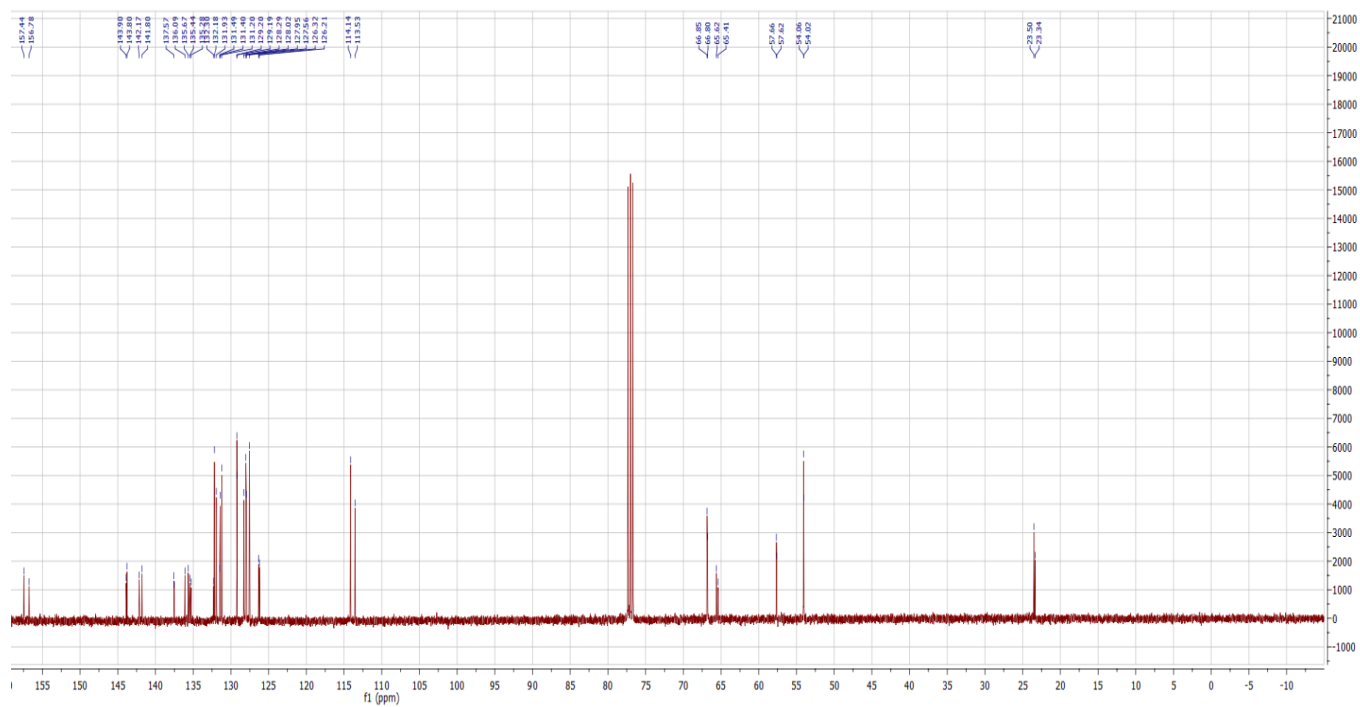

***E/Z*-1-(2-{4-[1-(4-Chloro-phenyl)-2-phenyl-propenyl]-phenoxy}-ethyl)-azepane (9).**

21-Jun-2017

MT13 Sm (SG, 2x2)

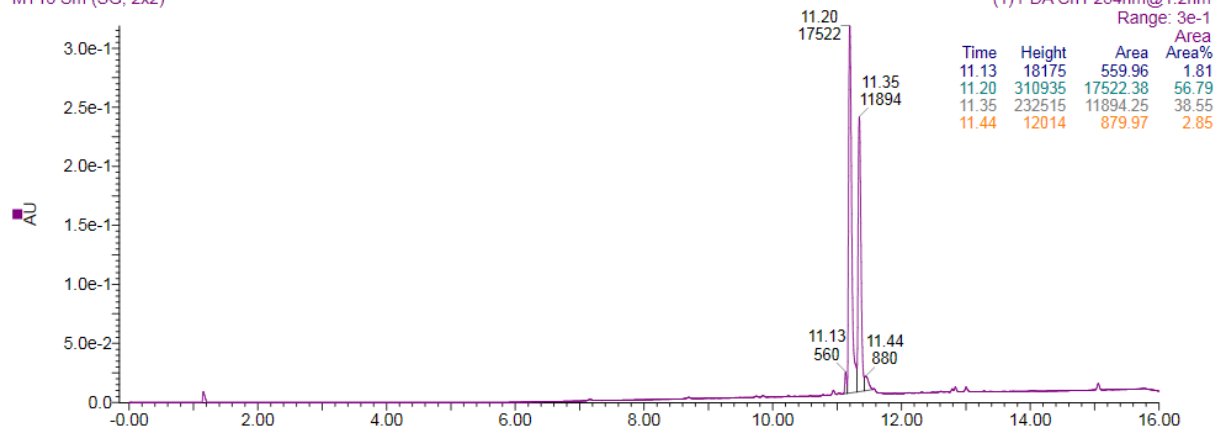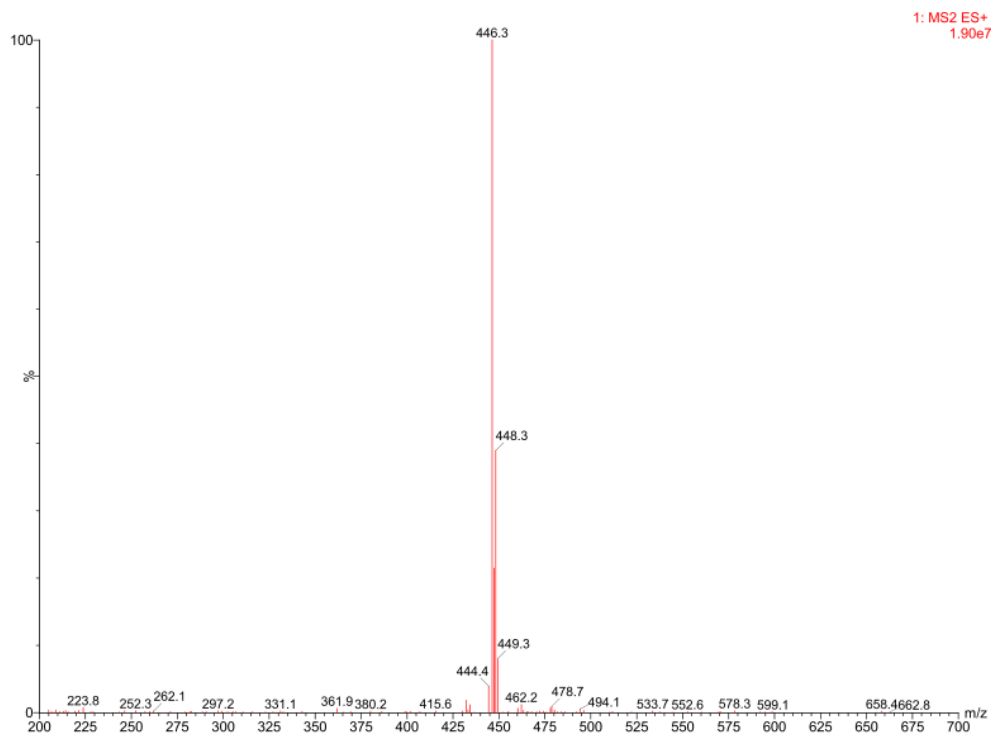

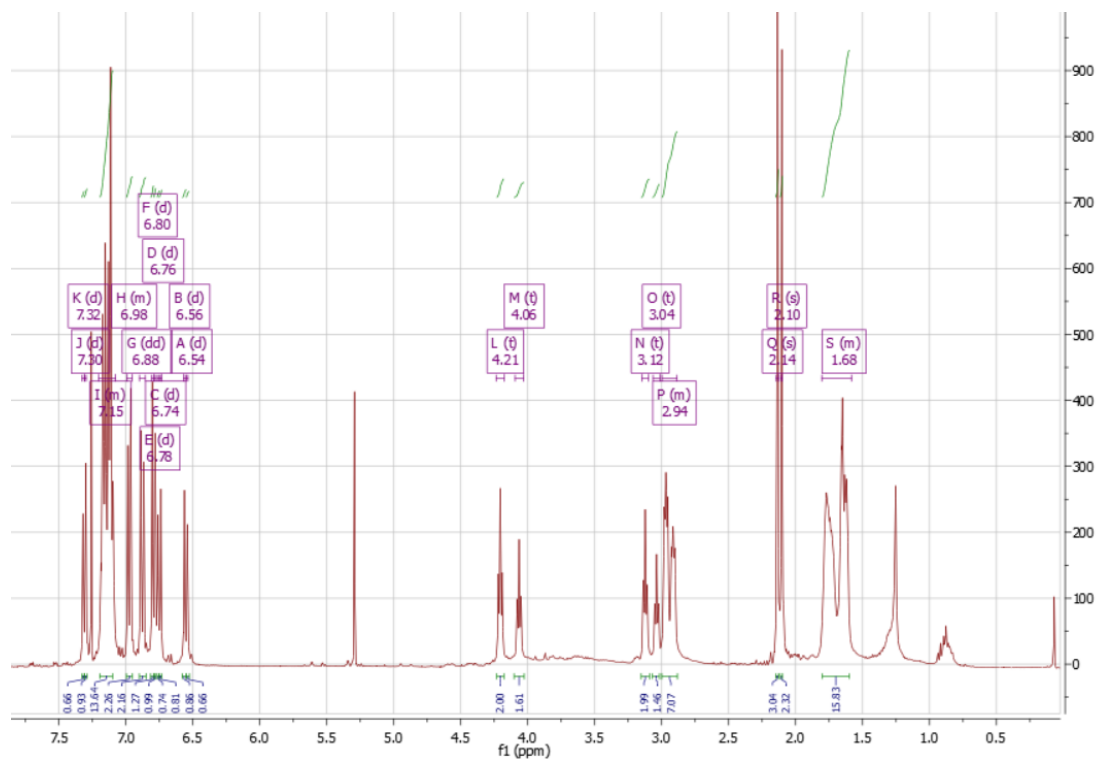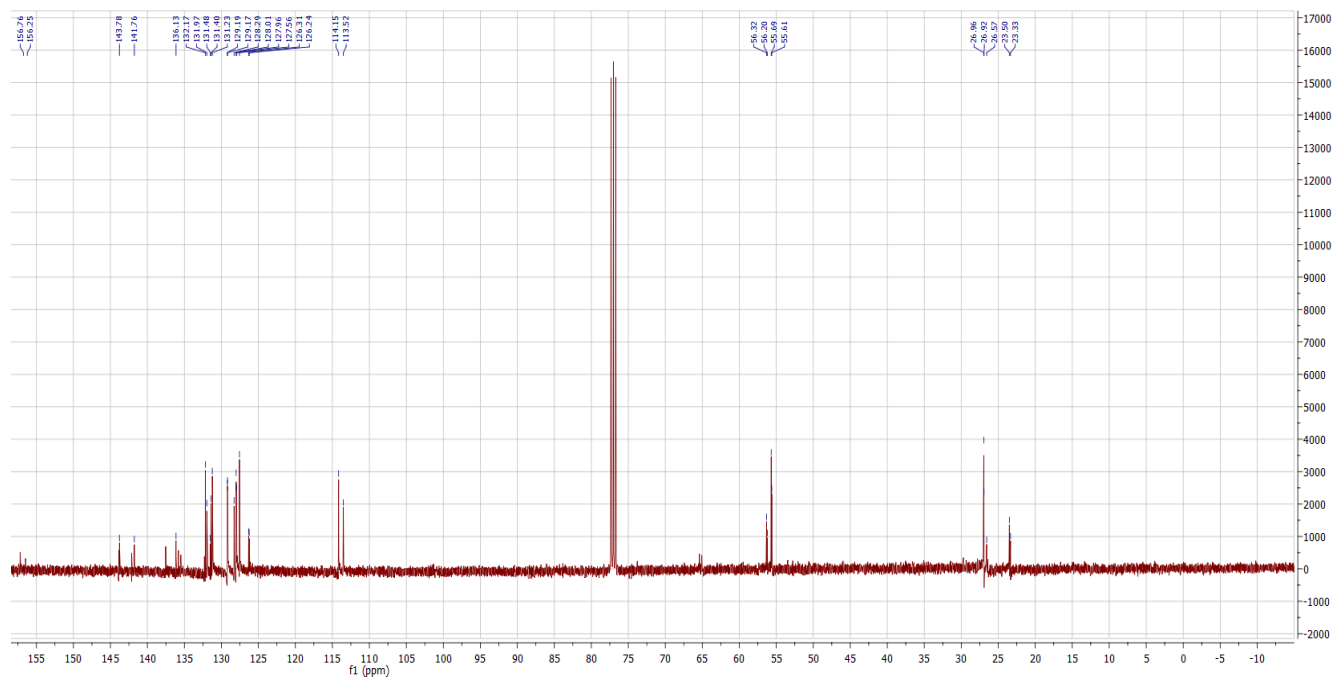



*E/Z*-(3-{4-[1-(4-Chloro-phenyl)-2-(4-methoxy-phenyl)-propenyl]-phenoxy}-propyl)-dimethyl-amine (10).

30-May-2017

MT9 Sm (SG, 2x2)

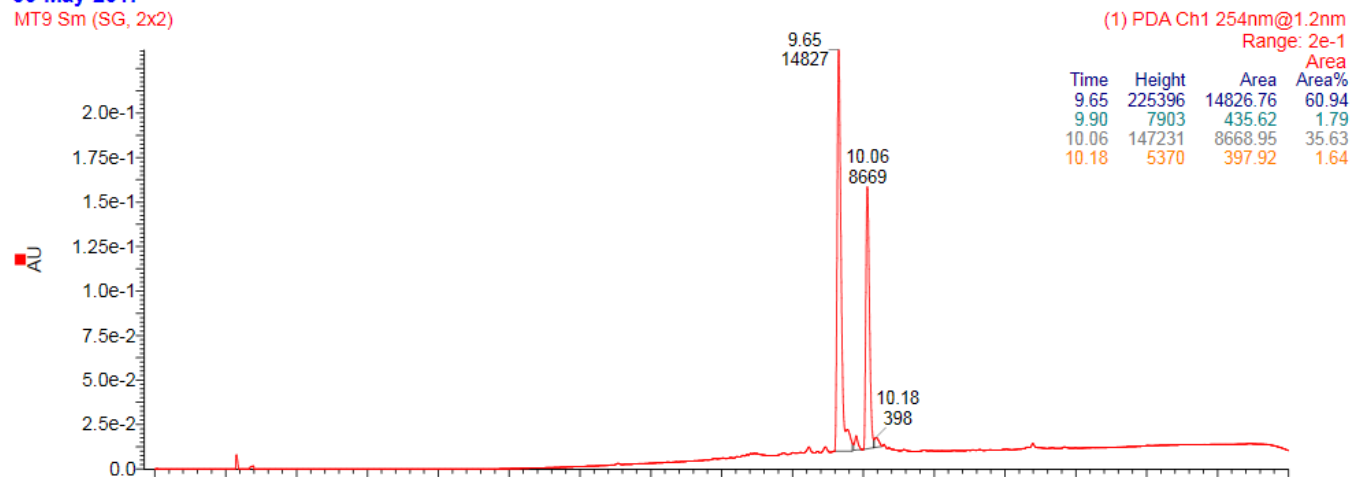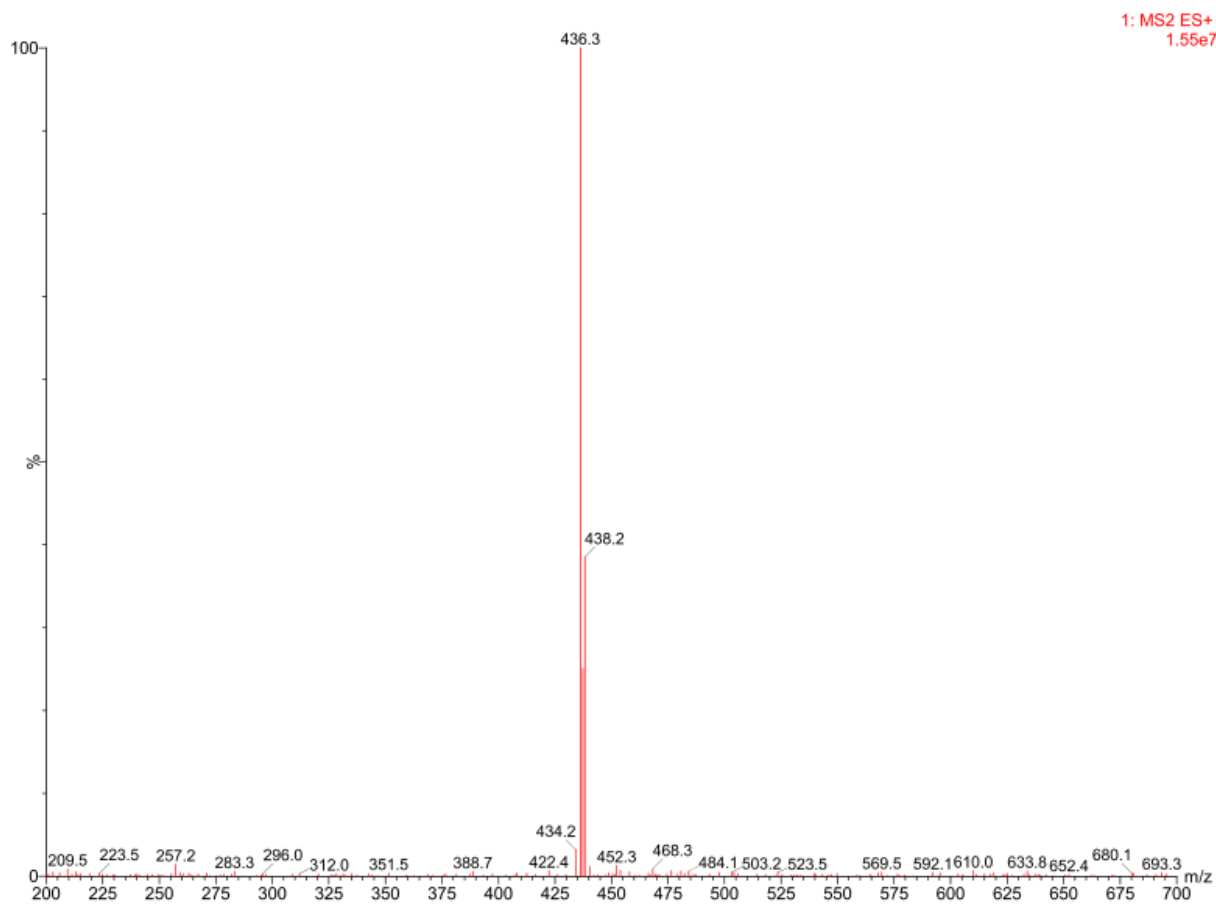

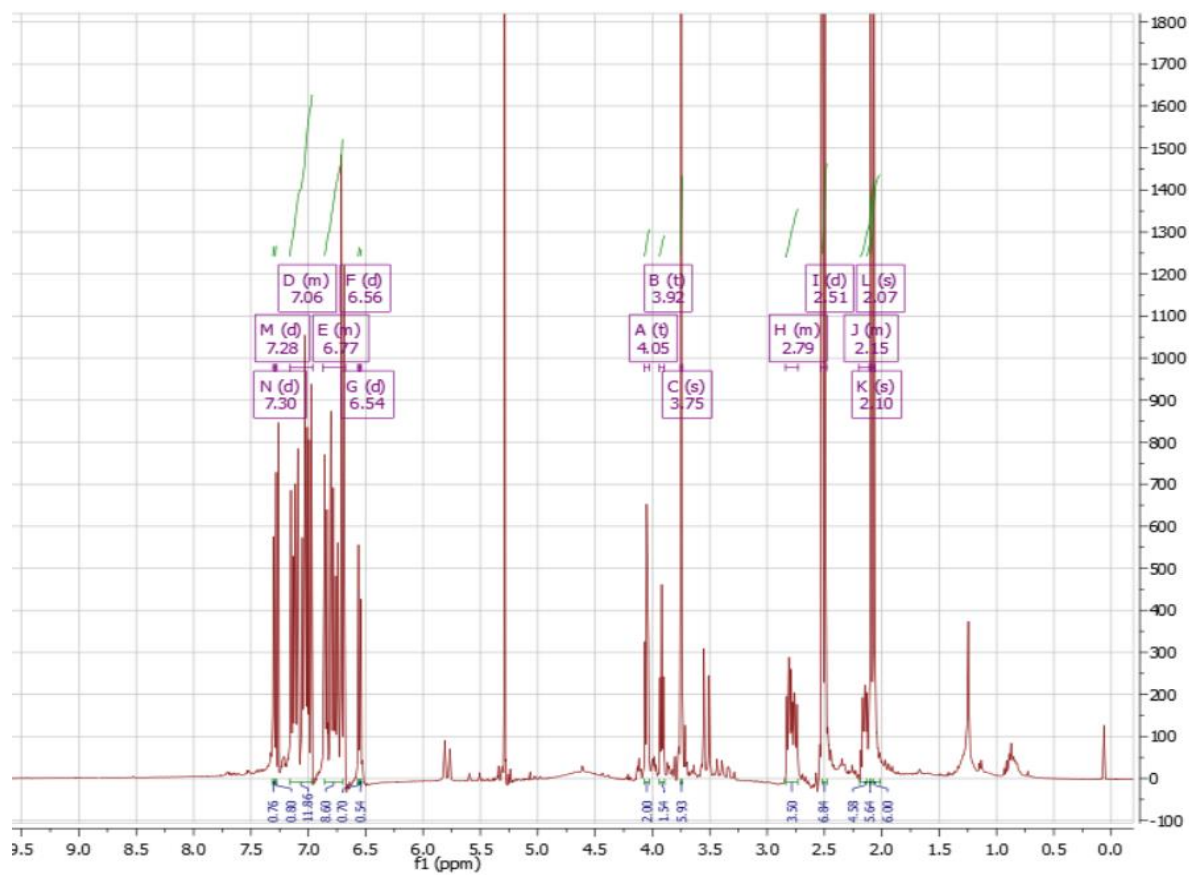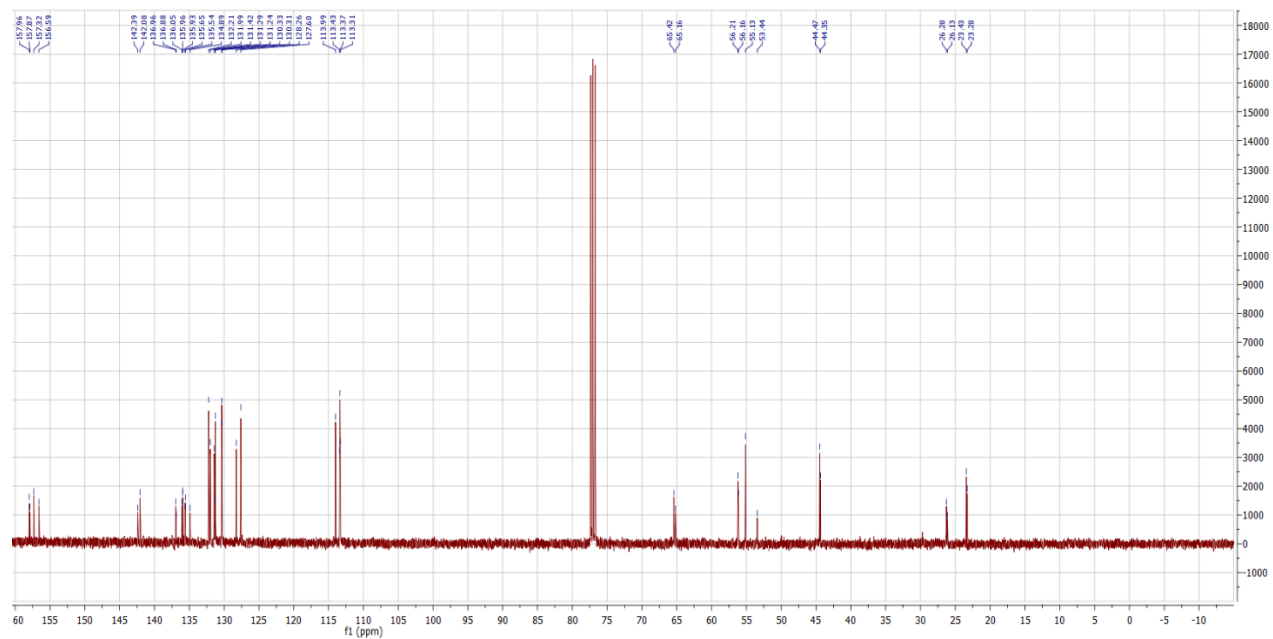

***E/Z*-1-(2-{4-[1-(4-Chloro-phenyl)-2-(4-methoxy-phenyl)-propenyl]-phenoxy}-ethyl)-pyrrolidine (11).**

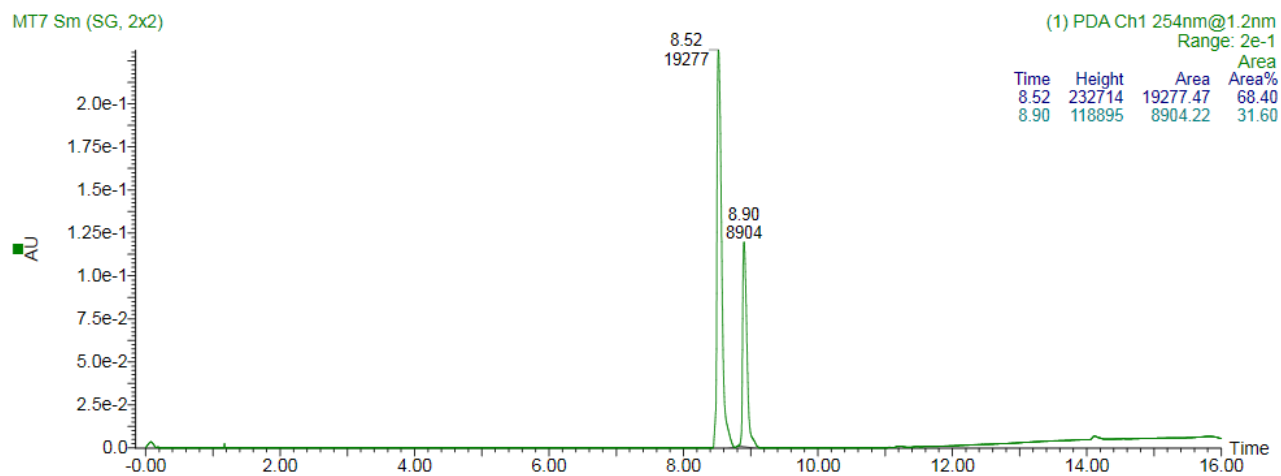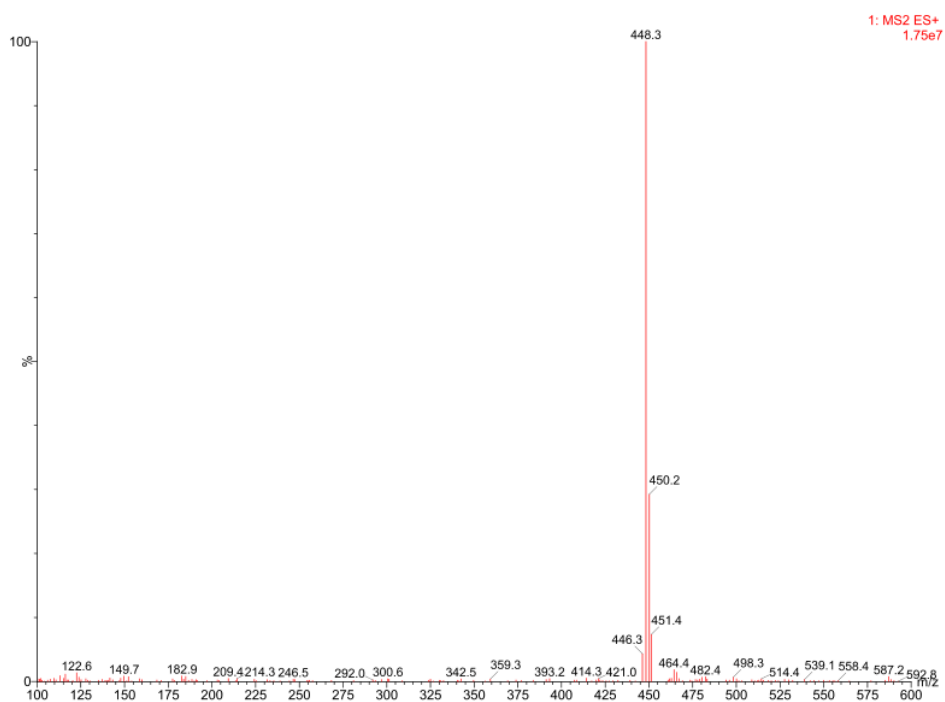

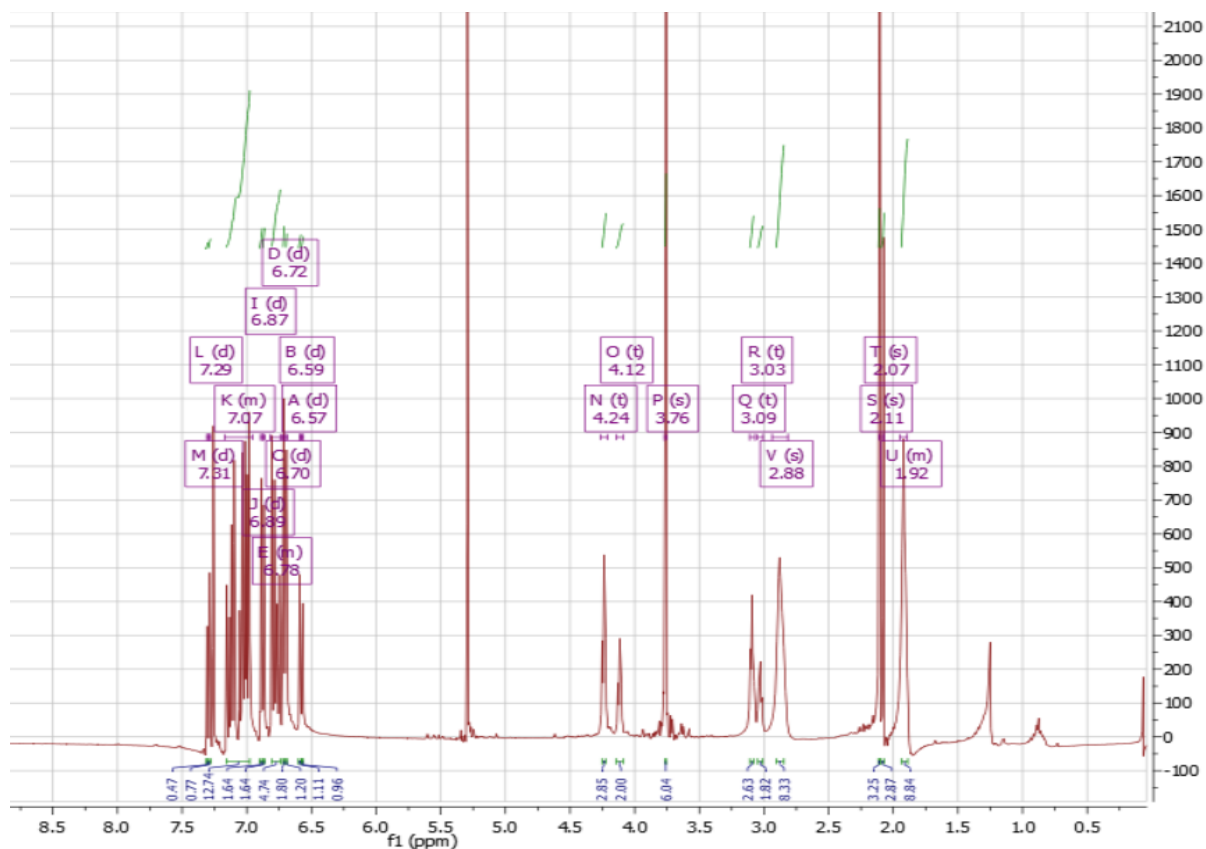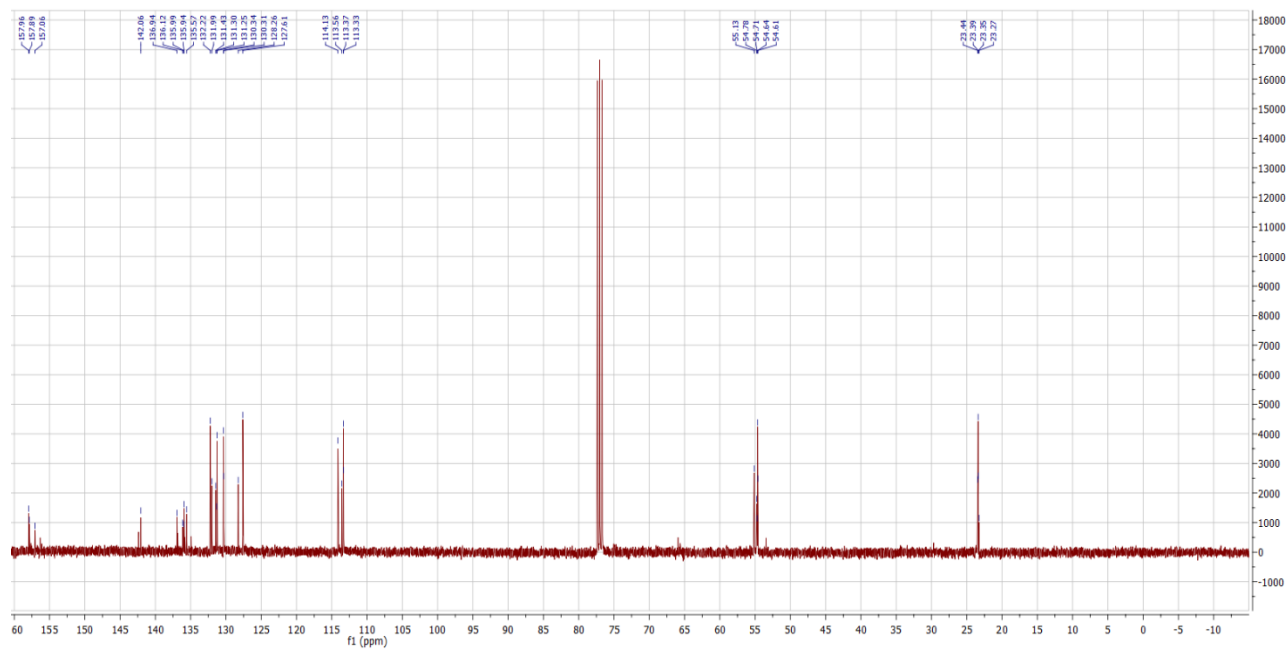

***E/Z*-1-(2-{4-[1-(4-Chloro-phenyl)-2-(4-methoxy-phenyl)-propenyl]-phenoxy}-ethyl)-piperidine (12).**

20-Mar-2017

MT6 Sm (SG, 2x2)

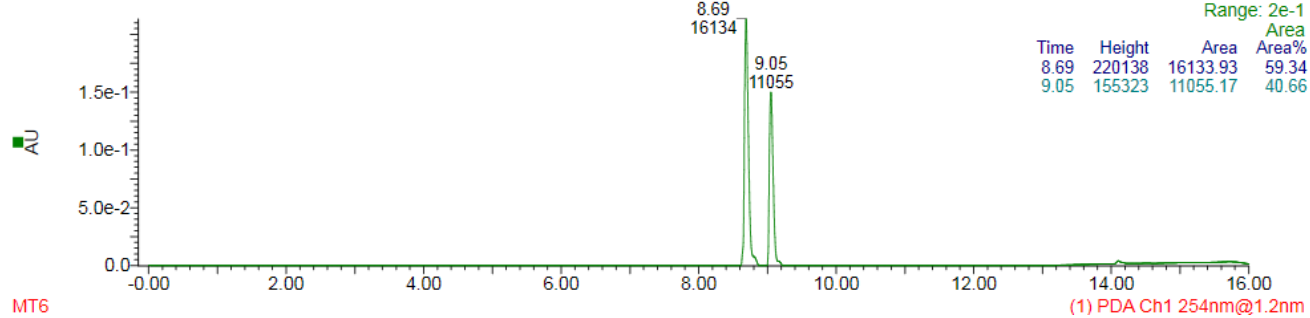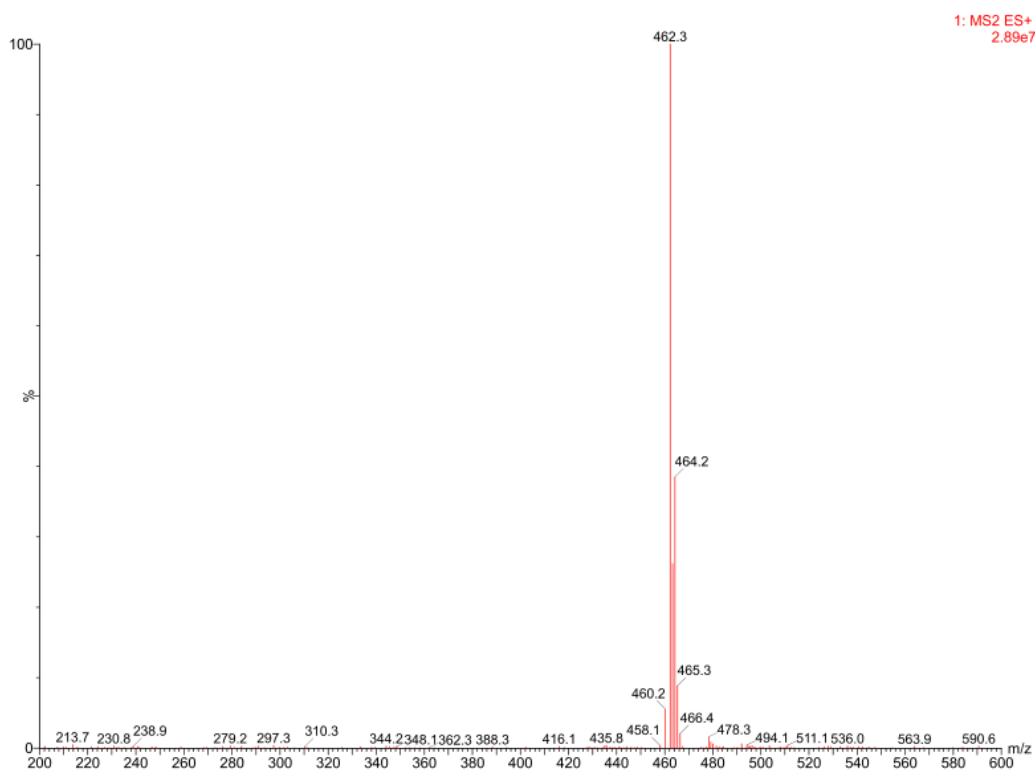

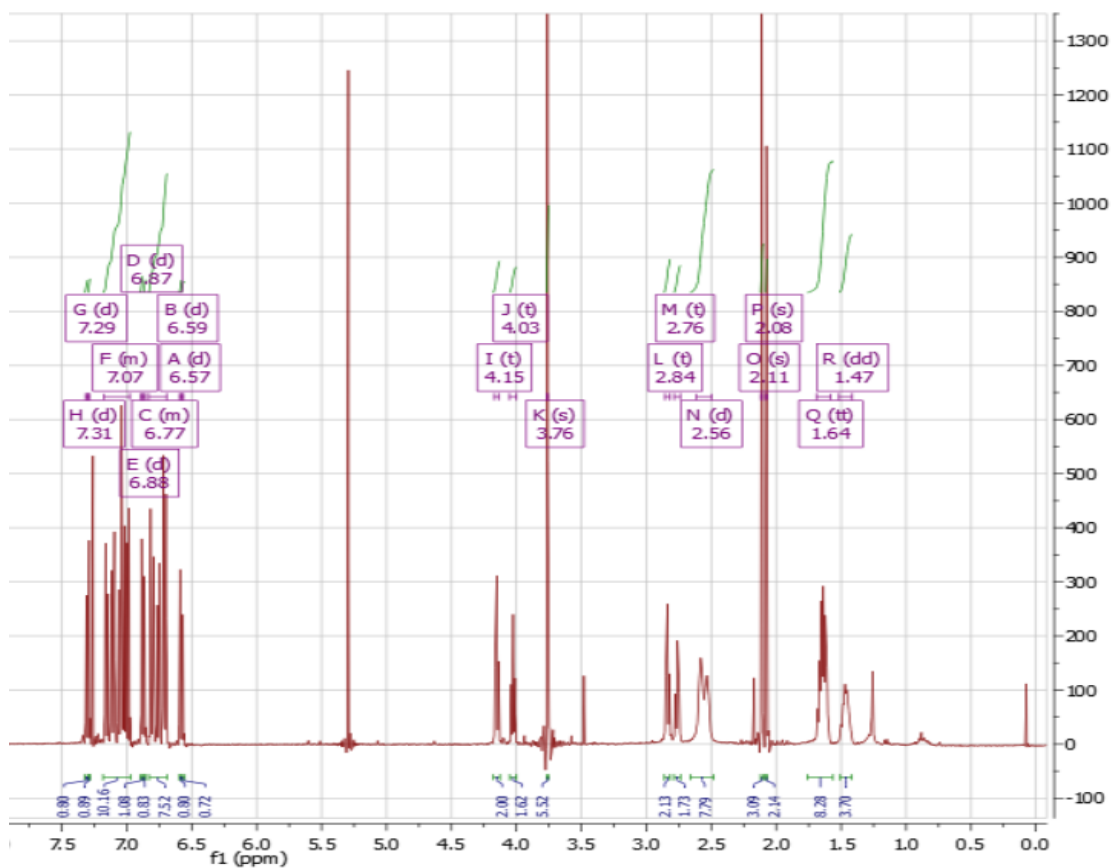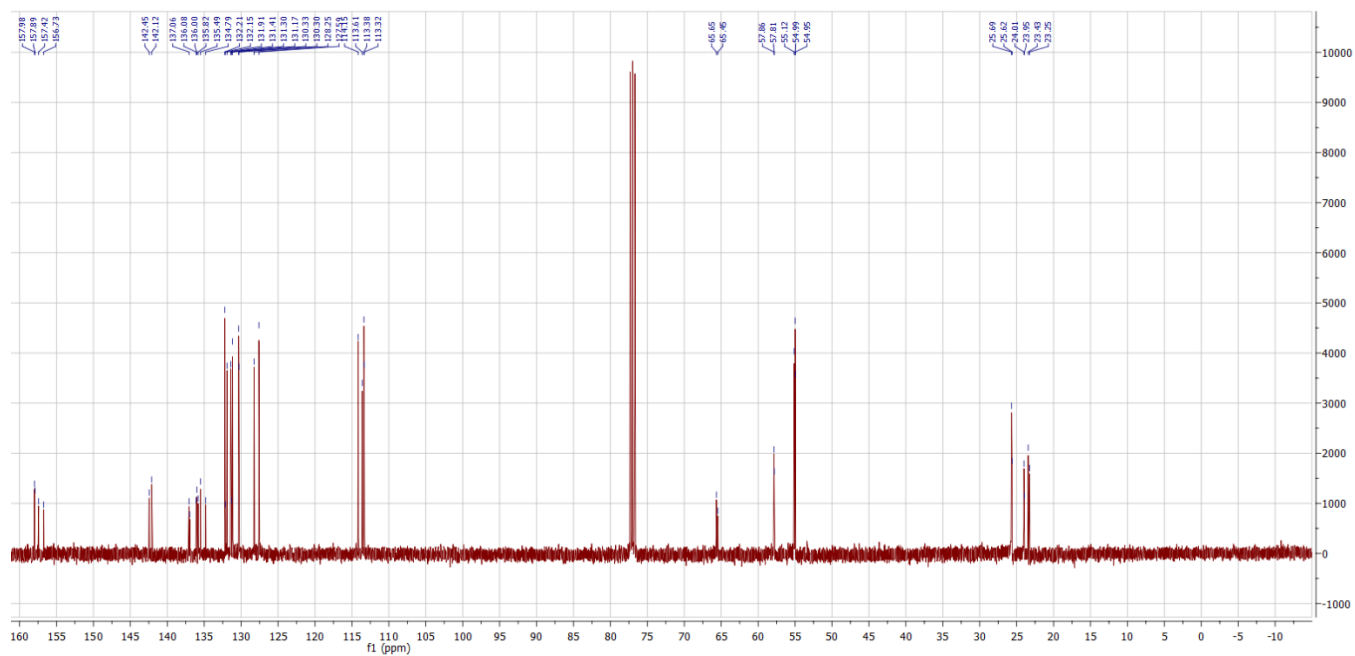

*E/Z*-4-(2-{4-[1-(4-Chloro-phenyl)-2-(4-methoxy-phenyl)-propenyl]-phenoxy}-ethyl)-morpholine (13).

08-Jun-2017  
MT10 Sm (SG, 2x2)

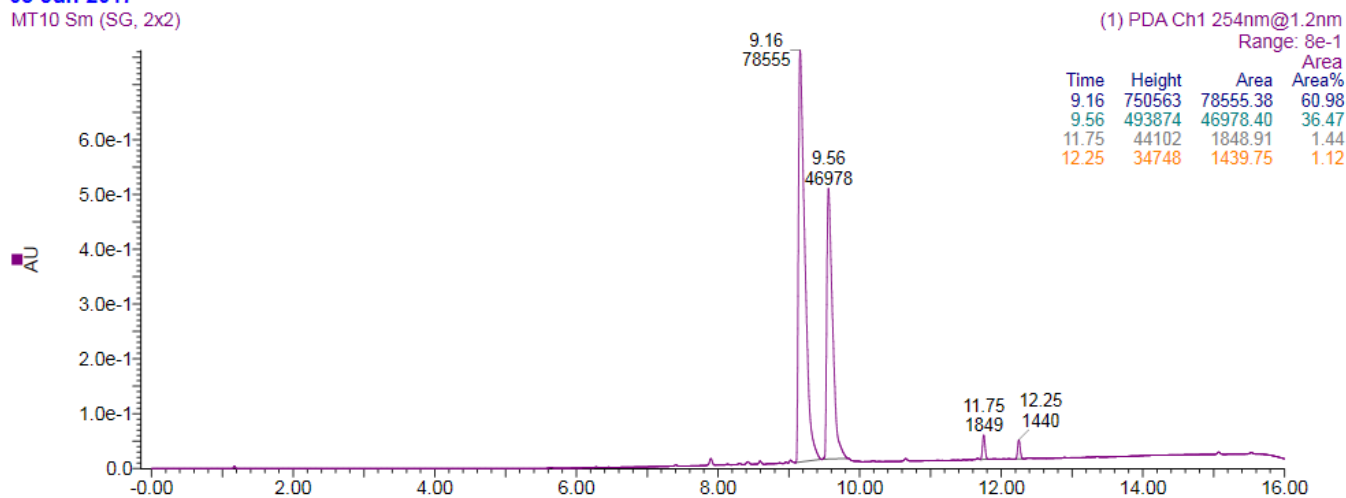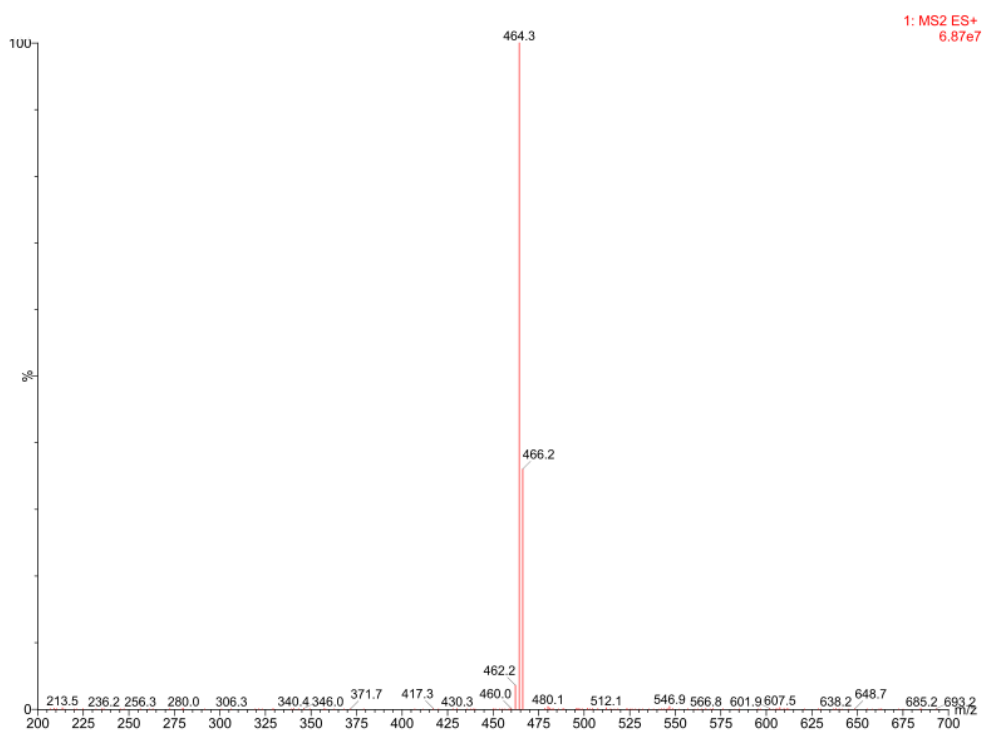

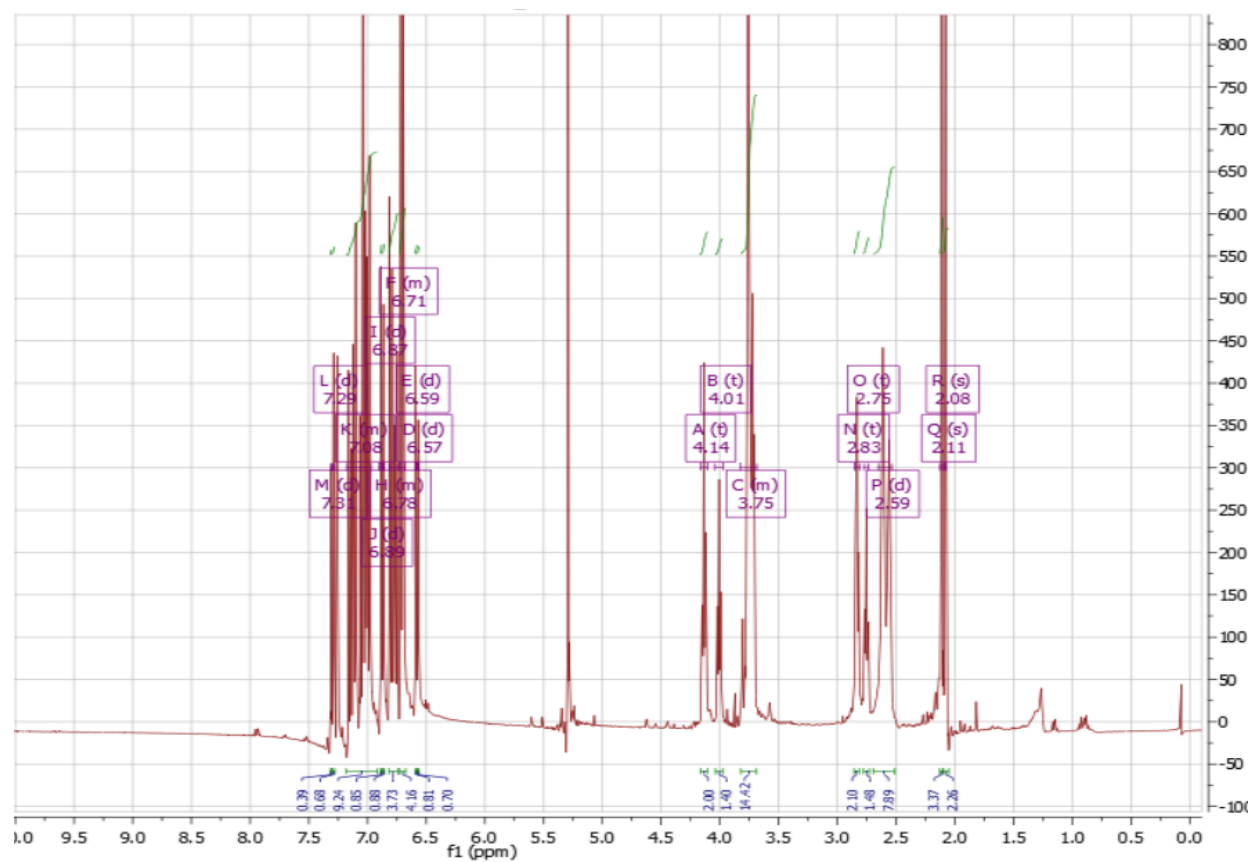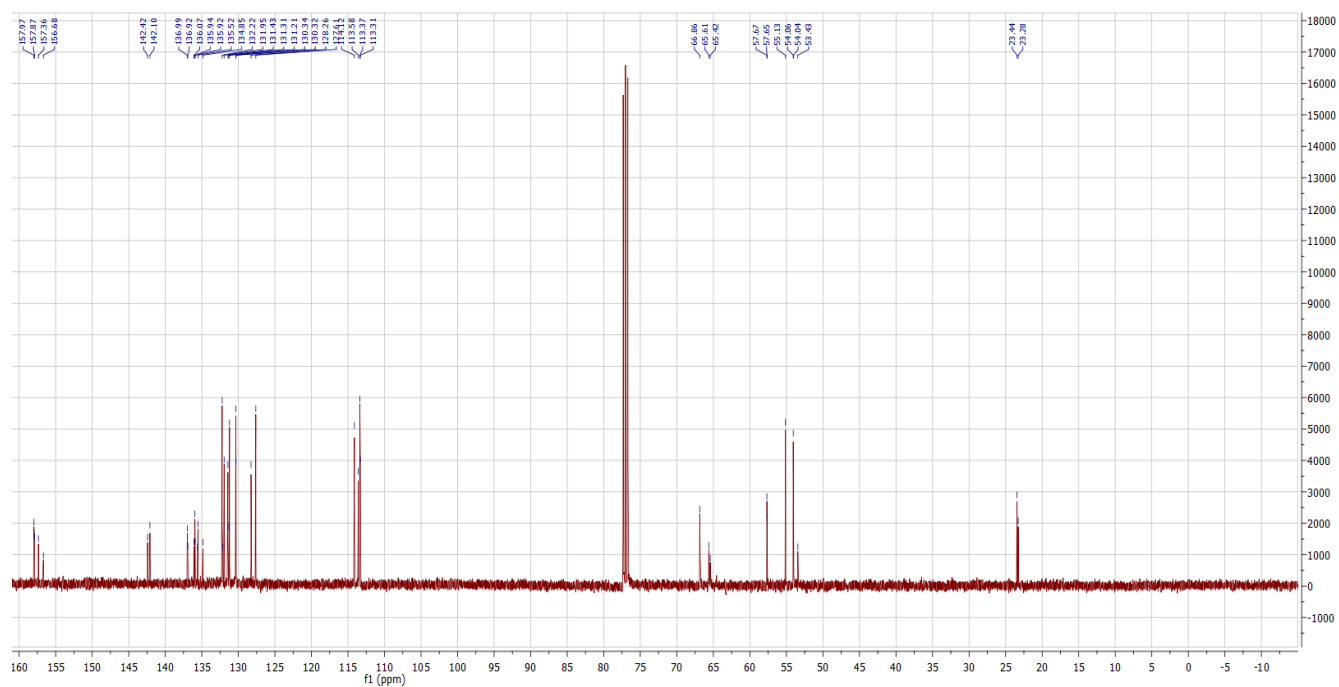



***E/Z*-(3-[4-[1-(4-Chlorophenyl)-2-(3-fluoro-4-methoxyphenyl)-propenyl]-phenoxy}-propyl)-dimethyl-amine (15)**

25-Oct-2018

AV19 Sm (SG, 2x2)

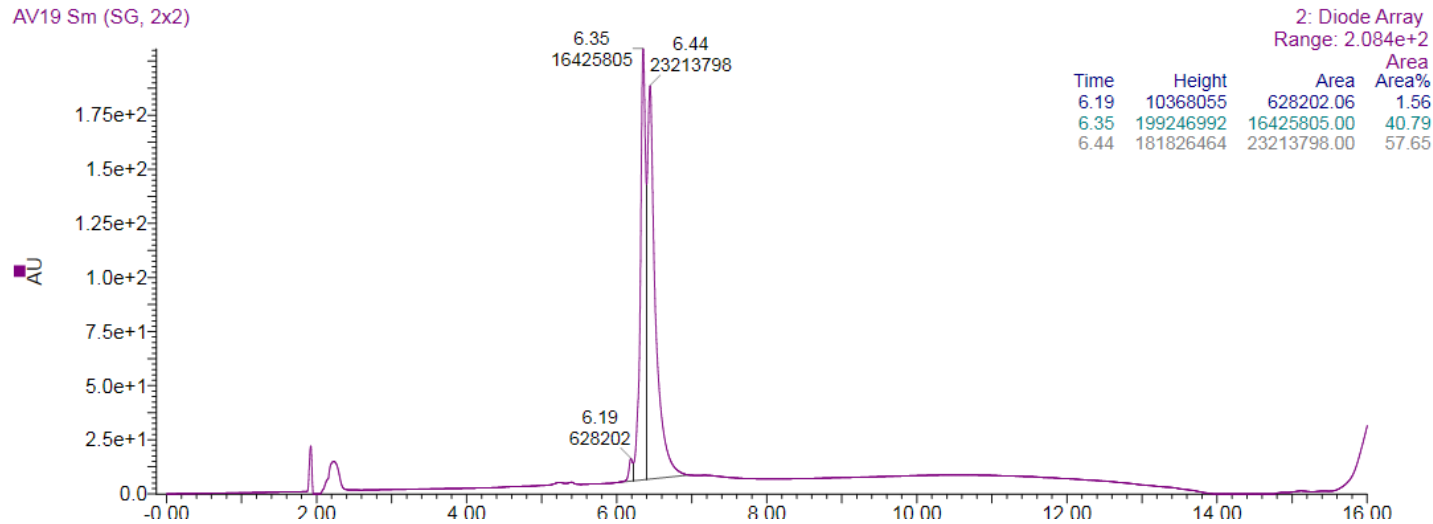

25-Oct-2018 13:52:15  
AV19 386 (6.511)

1: Scan ES+  
7.28e7

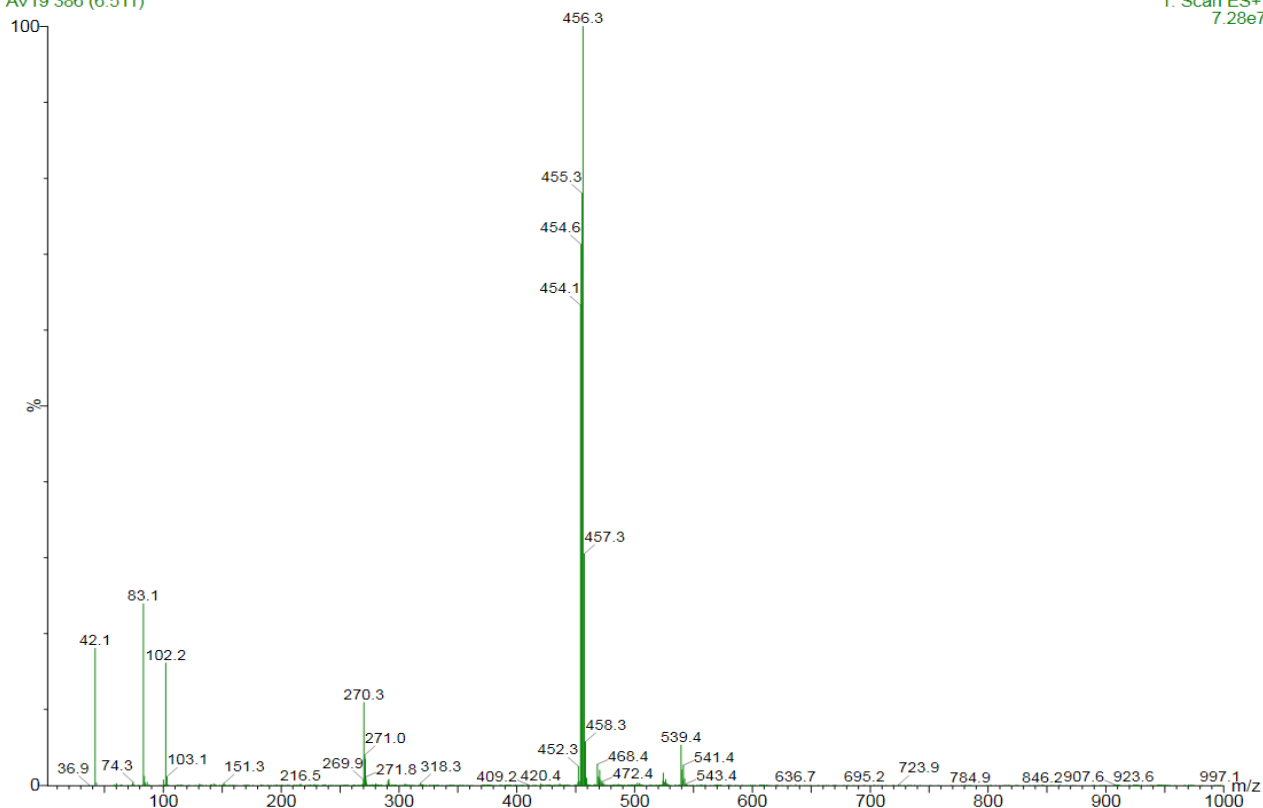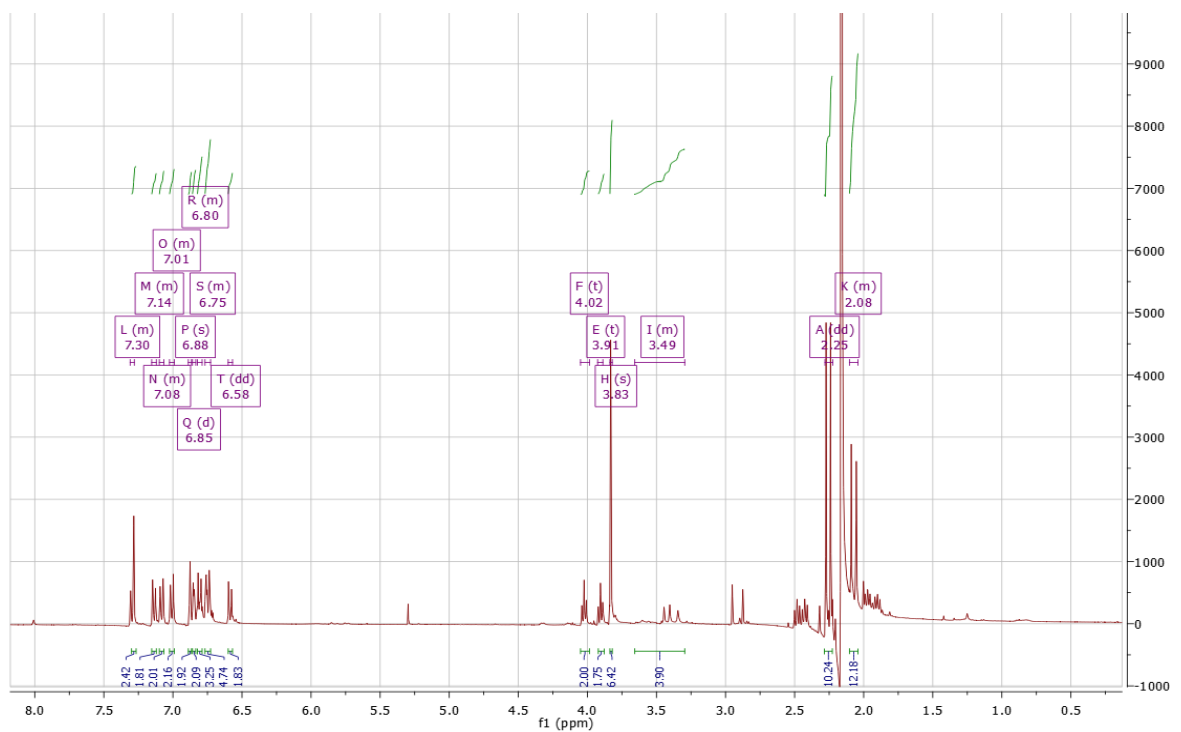

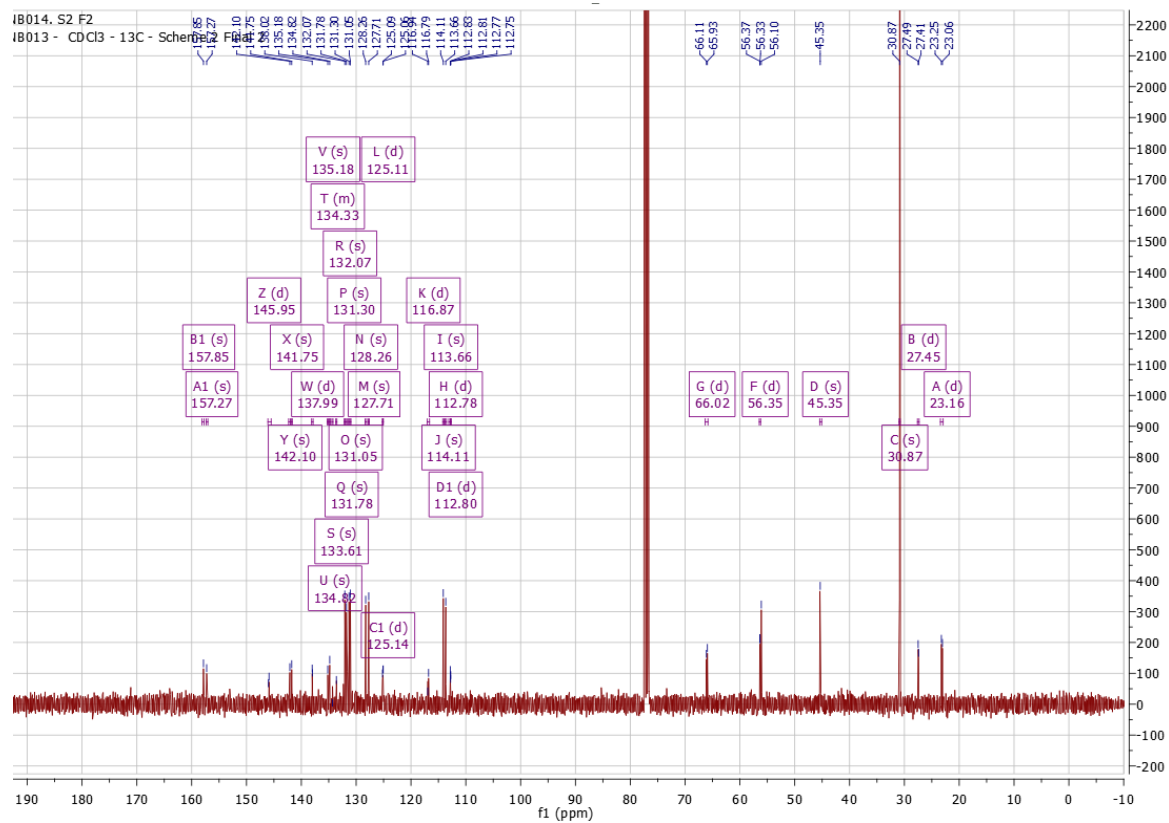

***E/Z*-1-(2-{4-[1-(4-Chlorophenyl)-2-(3-fluoro-4-methoxyphenyl)-propenyl]-phenoxy}ethyl)-pyrrolidine  
(16)**

01-Nov-2018  
AV25 Sm (SG, 2x2)

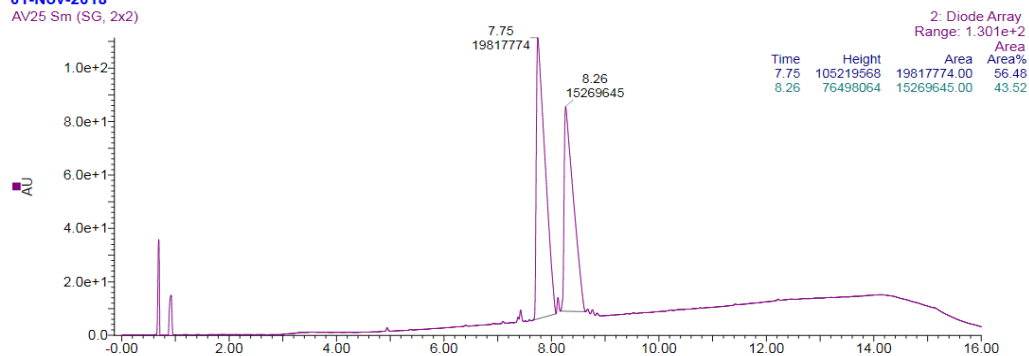

01-Nov-2018 17:51:49

AV25 495 (8.349) Cm (491:512)

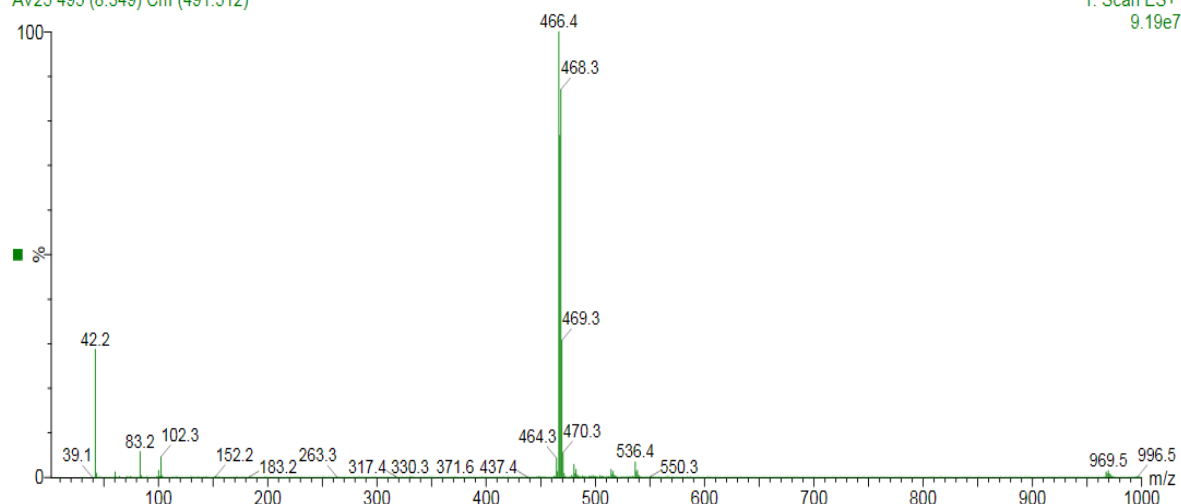

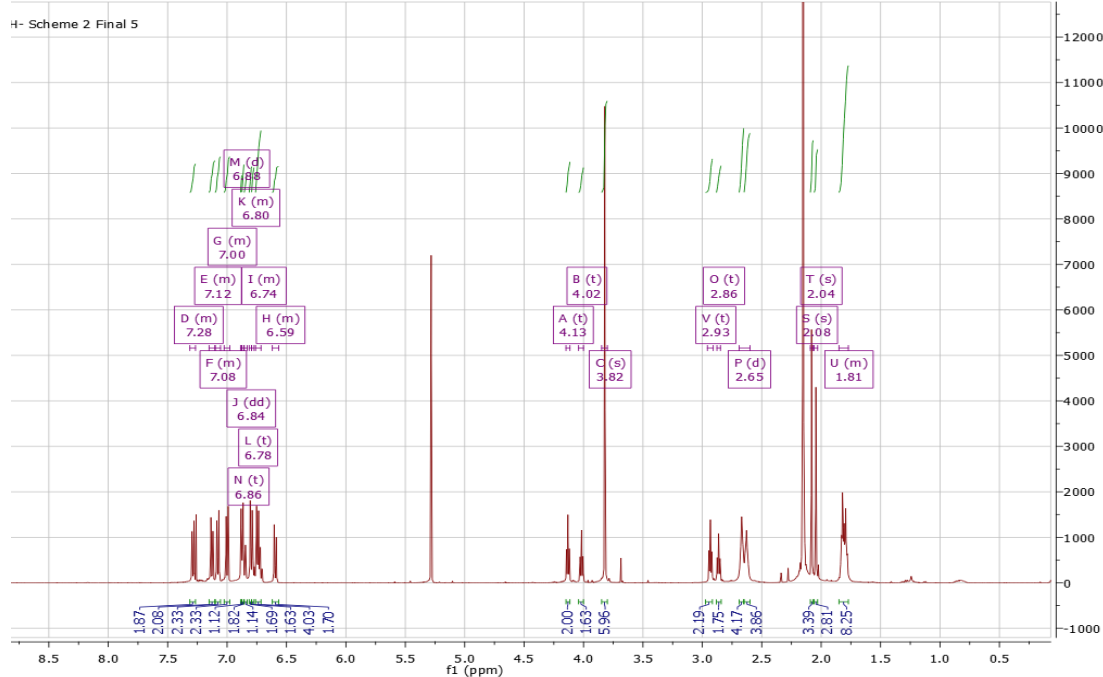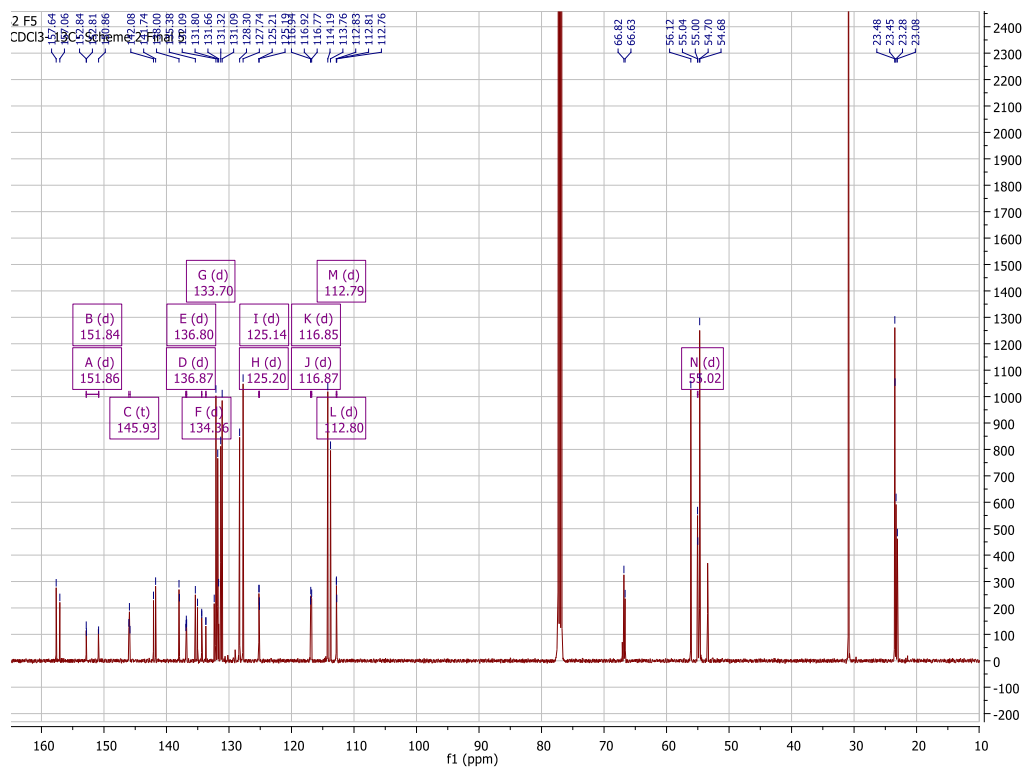

***E/Z*-1-(2-{4-[1-(4-Chlorophenyl)-2-(3-fluoro-4-methoxyphenyl)-propenyl]-phenoxy}ethyl)-piperidine  
(17)**

26-Oct-2018  
AV20 Sm (SG, 2x2)

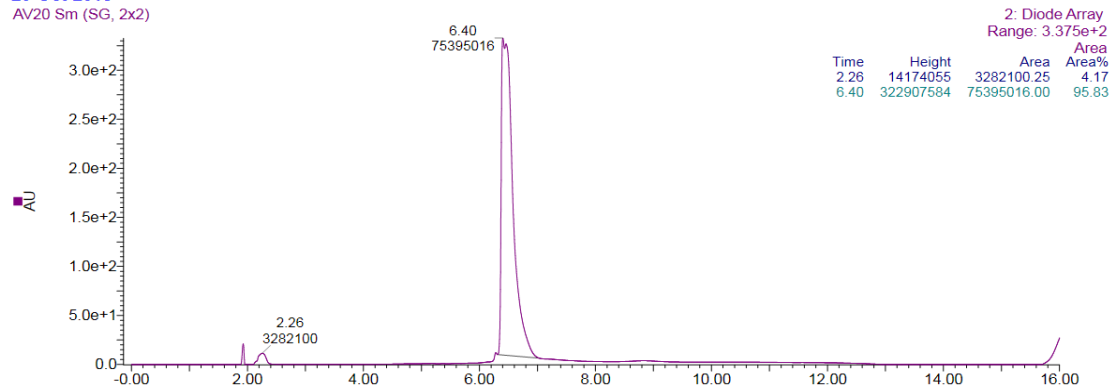

26-Oct-2018 11:23:52  
AV20 386 (6.510)

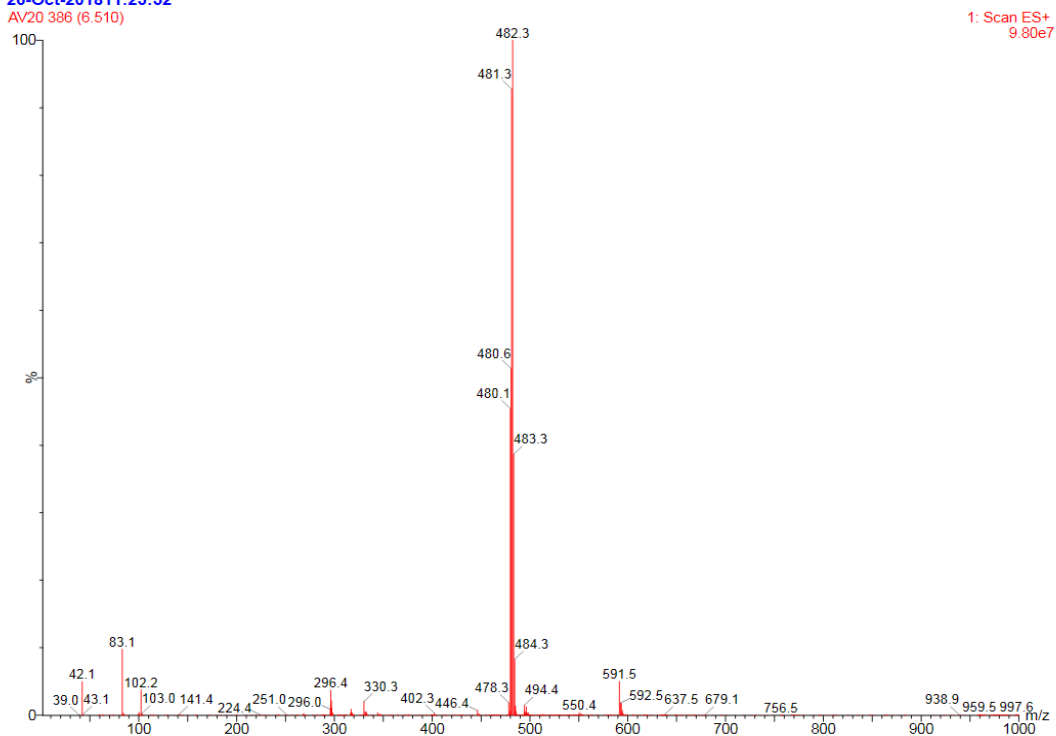

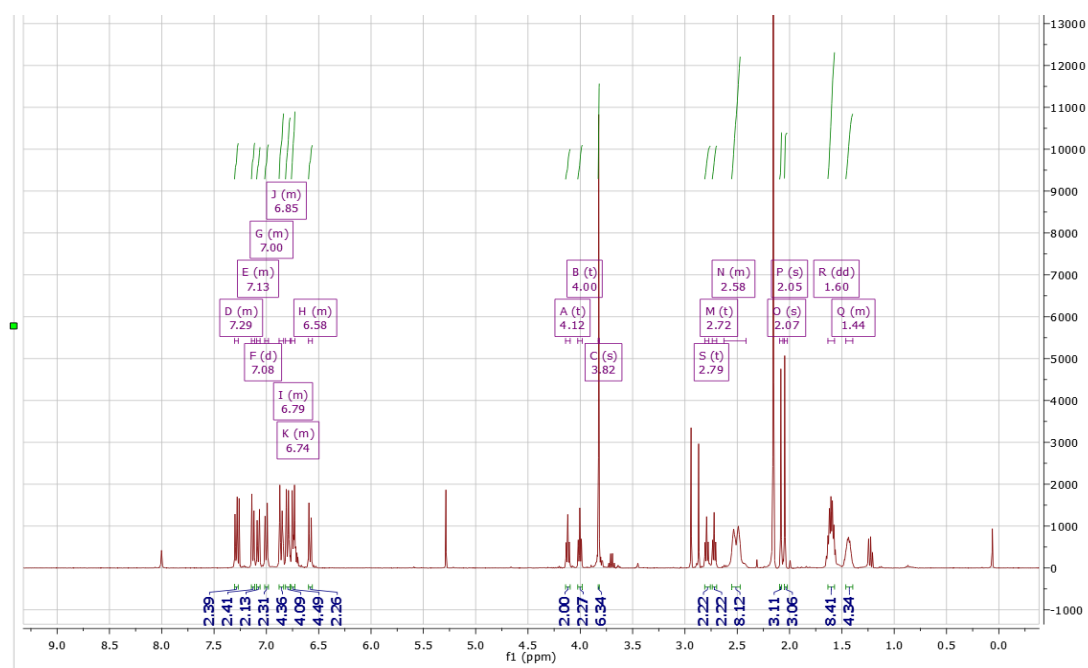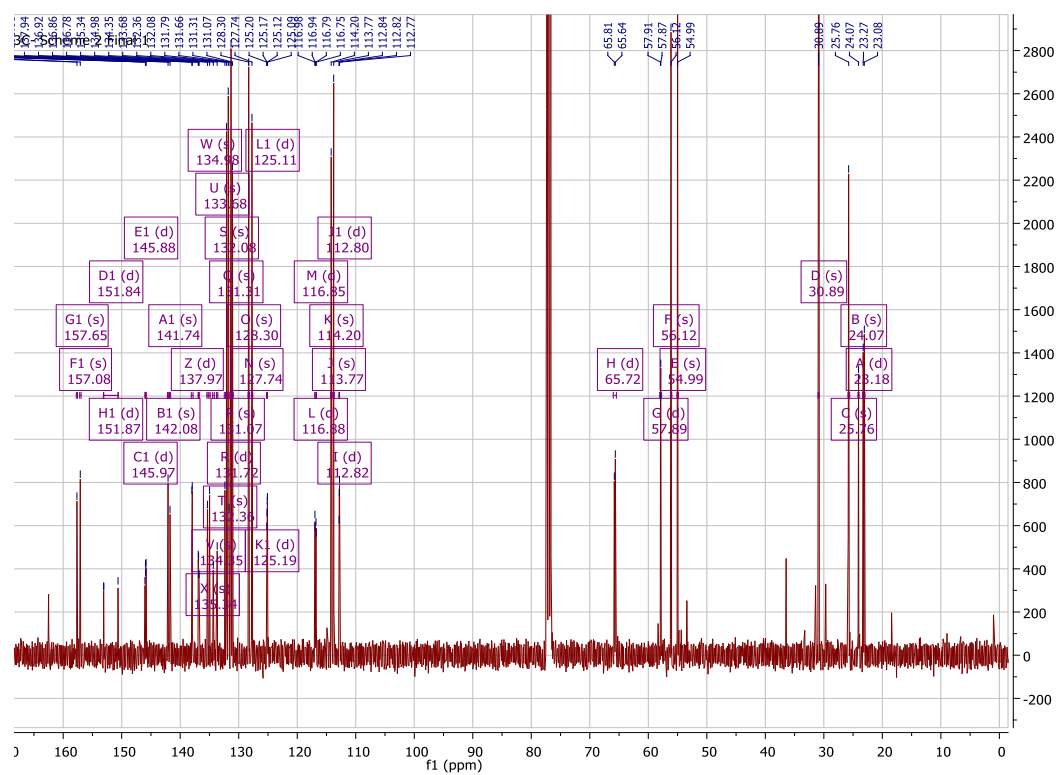

***E/Z*-4-(2-{4-[1-(4-Chlorophenyl)-2-(3-fluoro-4-methoxyphenyl)-propenyl]-phenoxy}ethyl)-morpholine  
(18)**

01-Nov-2018  
AV22-3 Sm (SG, 2x2)

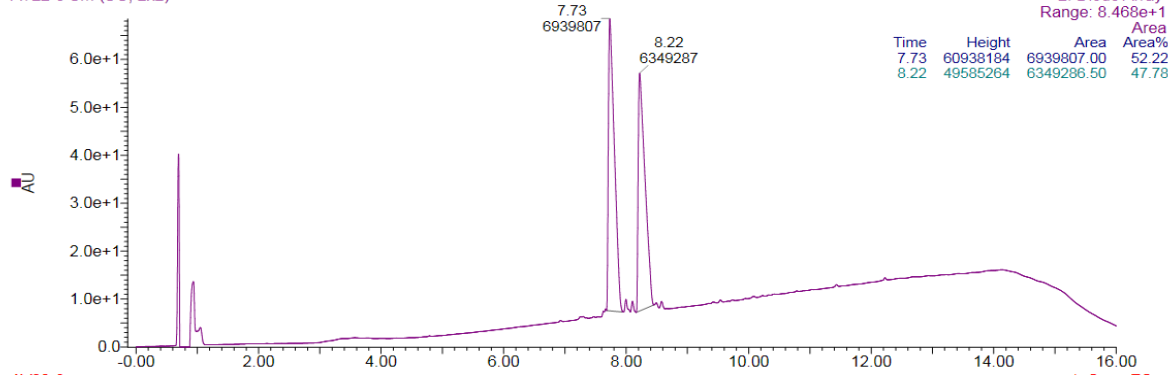

01-Nov-2018 13:49:58  
AV22-3 494 (8.333) Cm (490:505)

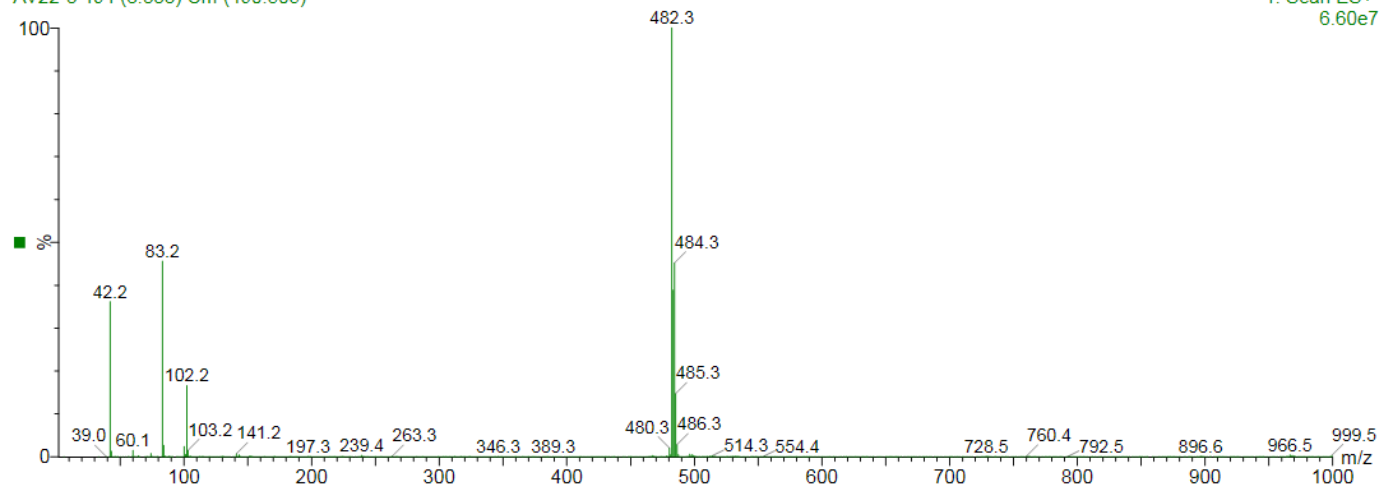



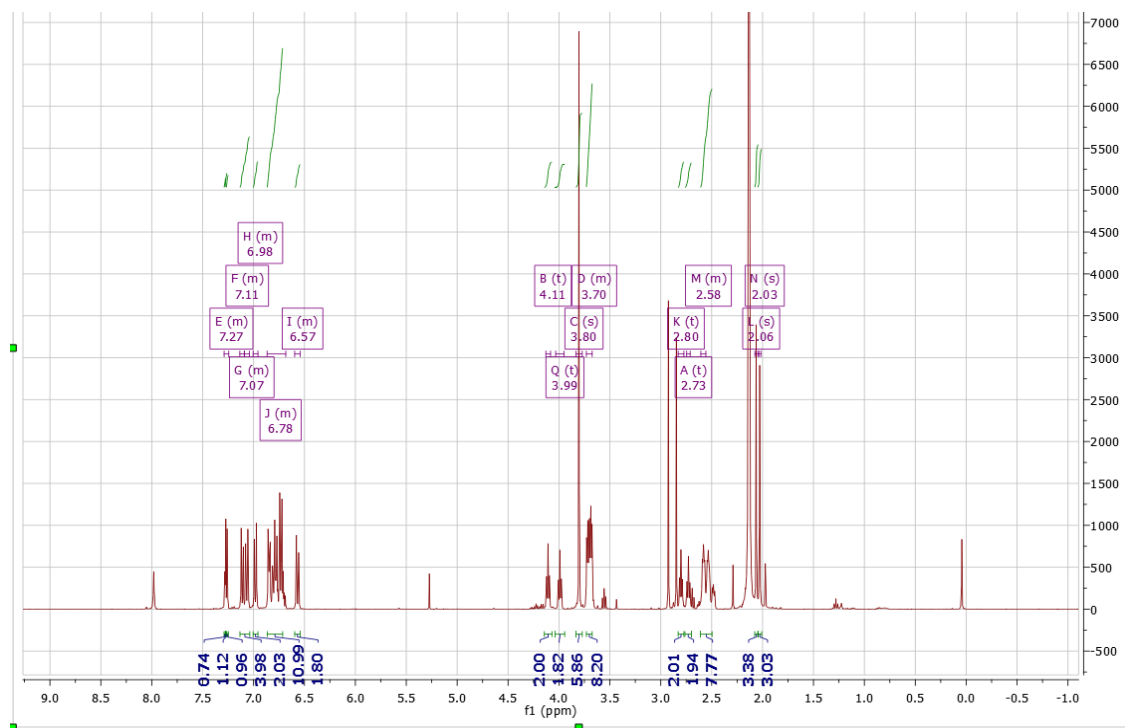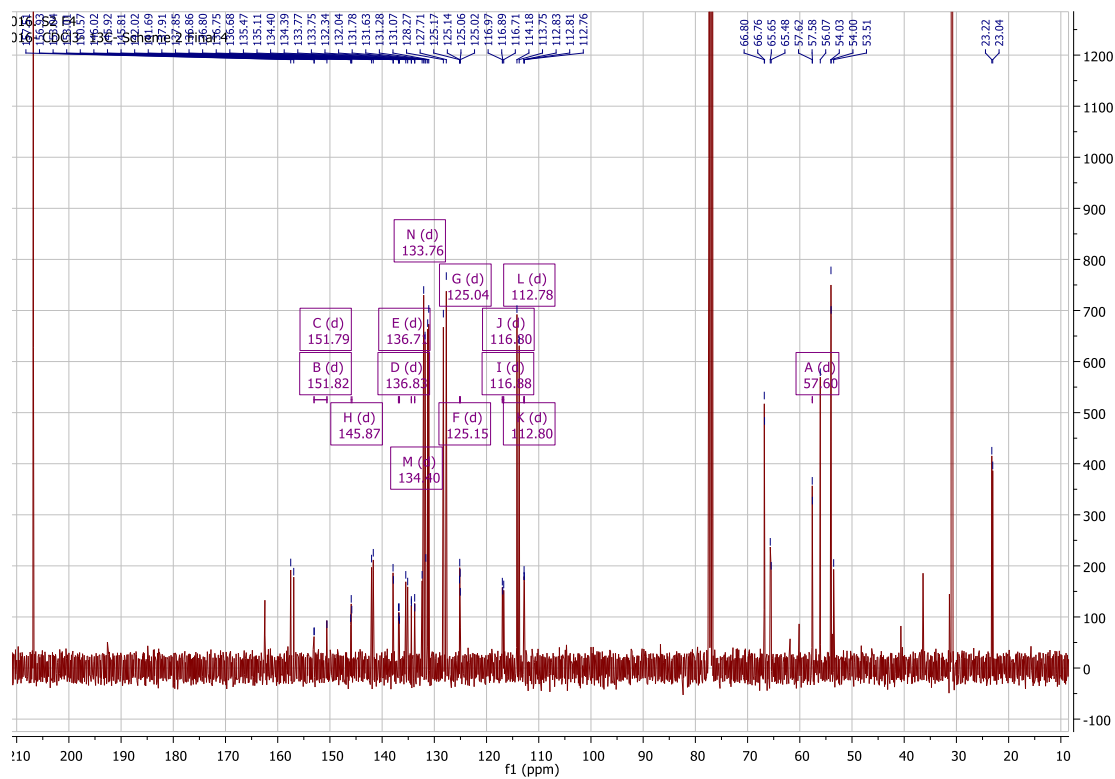

***E/Z*-(2-{4-[1-(4-Chlorophenyl)-2-(3-fluoro-4-methoxyphenyl)-propenyl]-phenoxy}-ethyl)-dimethyl-**

02-Nov-2018  
AV26b Sm (SG, 2x2)

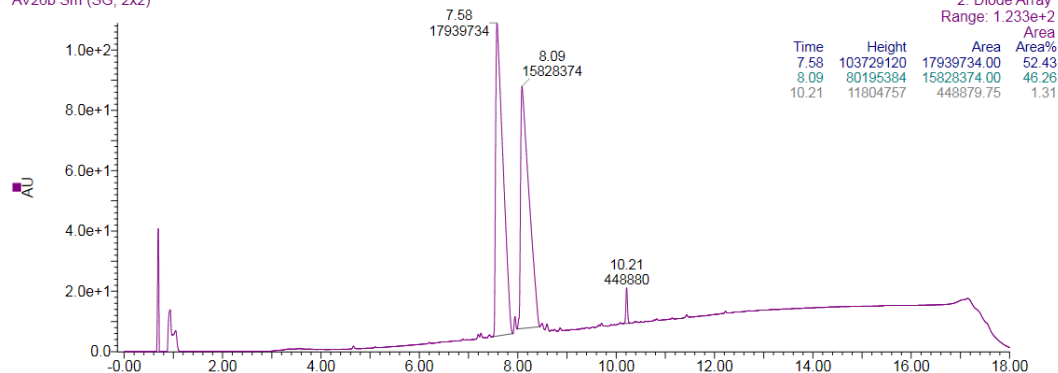

amine (20)

02-Nov-2018 16:37:47  
AV26b 484 (8.164) Cm (478:503)

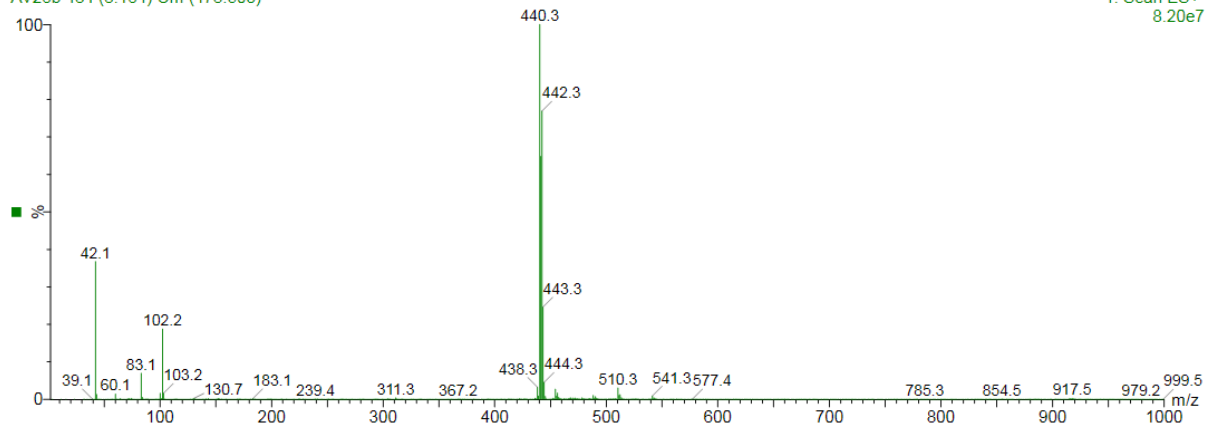

1: Scan ES+  
8.20e7

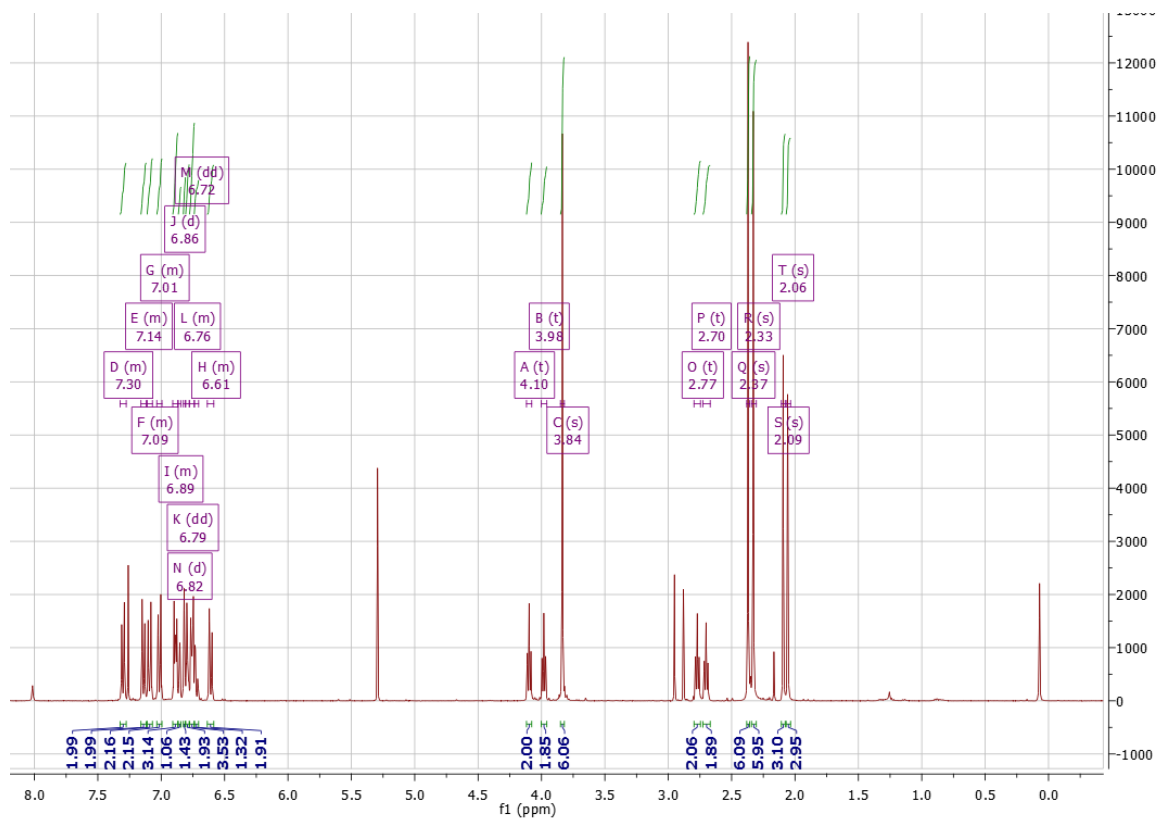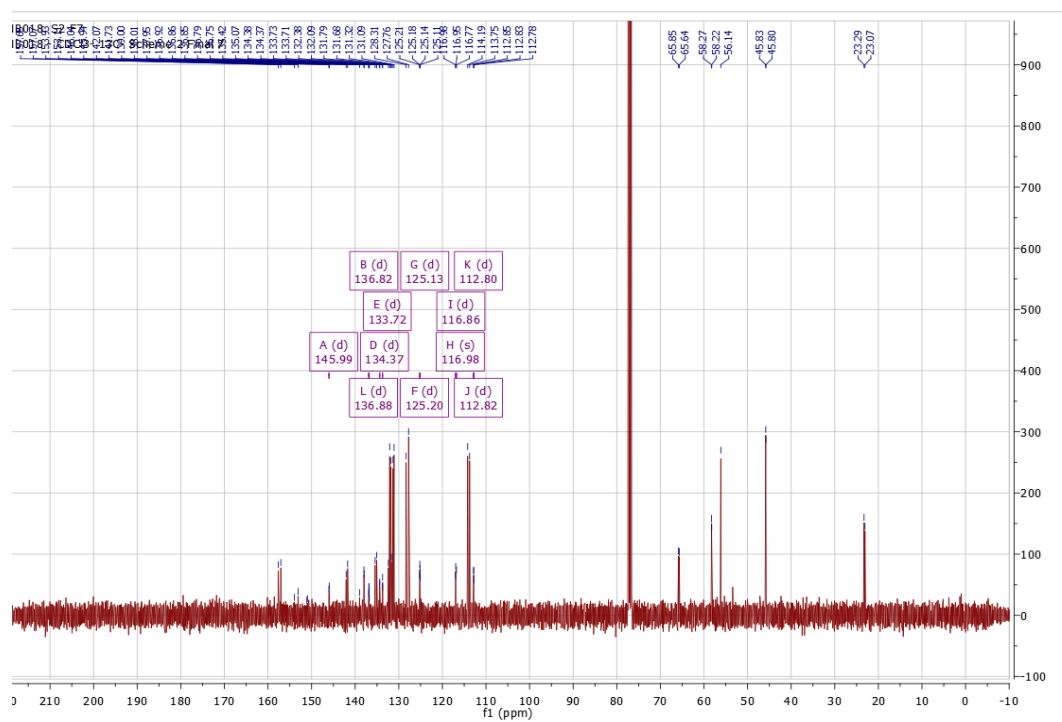

***E/Z*-2-{4-[1-(4-Chlorophenyl)-2-(3-fluoro-4-methoxyphenyl)-propenyl]-phenoxy}ethyl)-diethyl-amine  
(21)**

29-Oct-2018

AV23 Sm (SG, 2x2)

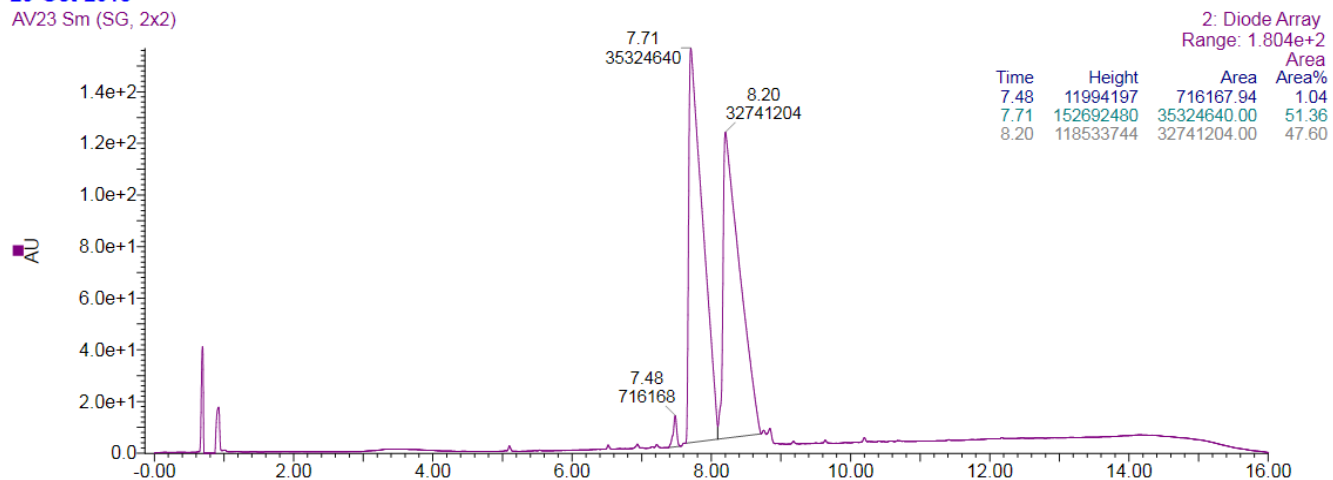

29-Oct-2018 18:20:58

AV23 493 (8.315) Cm (488:508)

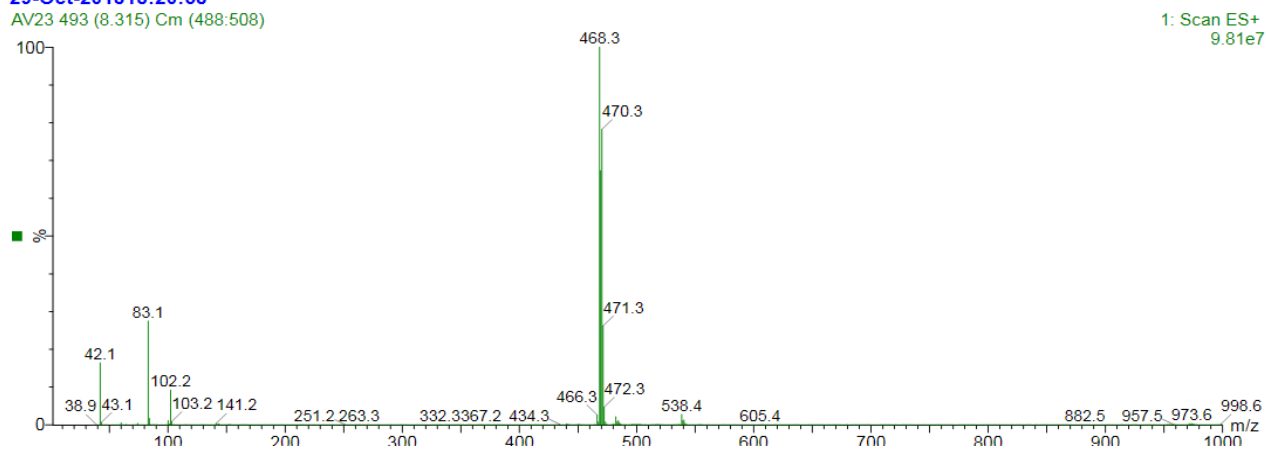



20-Nov-2018  
AV33 Sm (SG, 2x2)

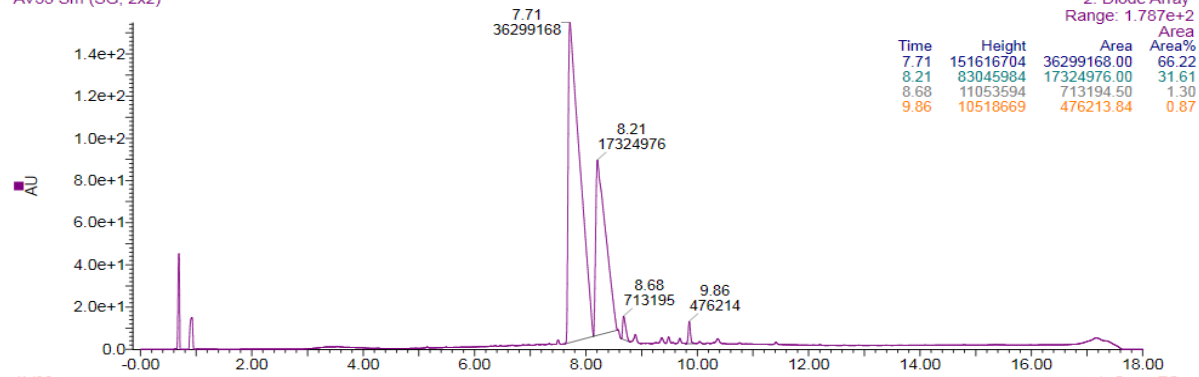

20-Nov-2018 16:38:07  
AV33 491 (8.281) Cm (485:505)

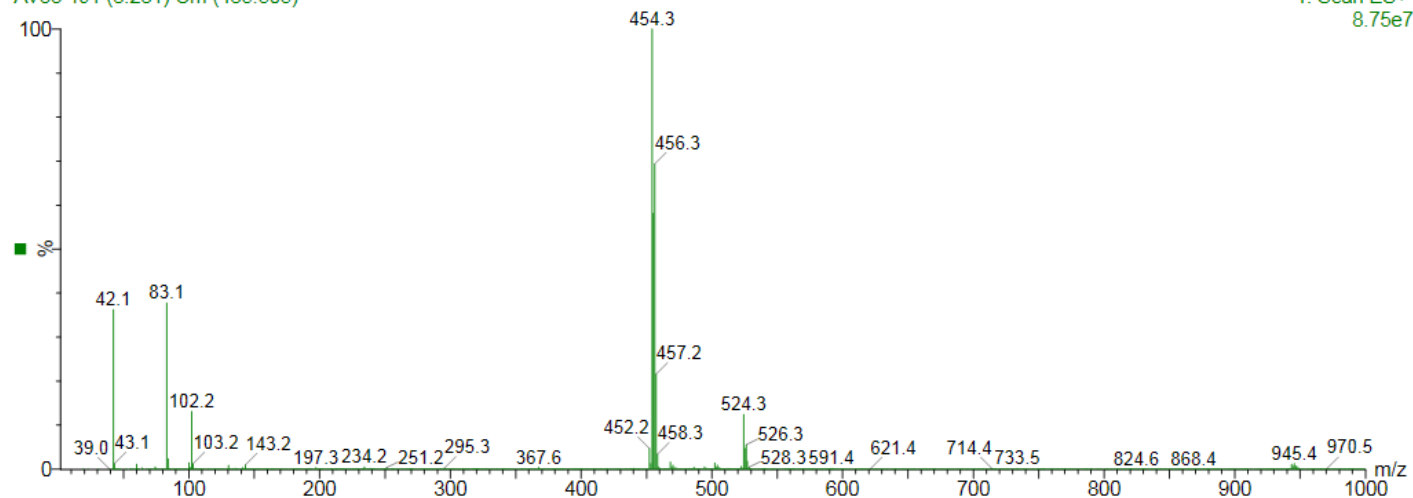

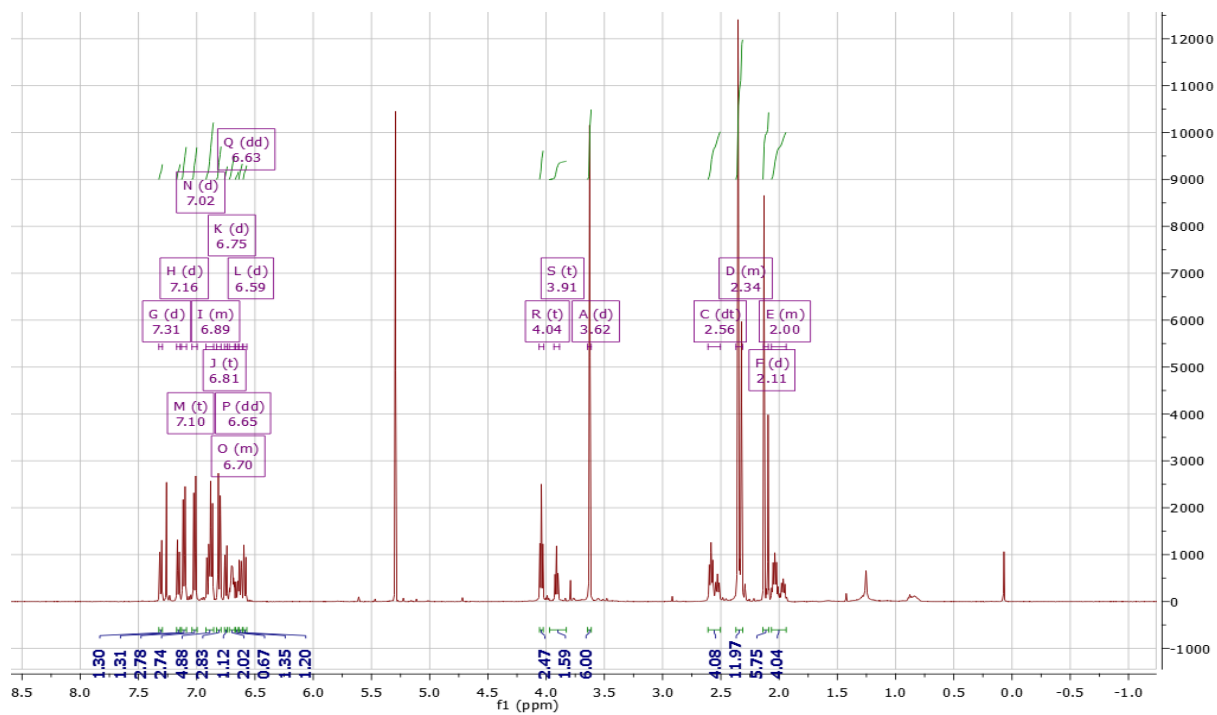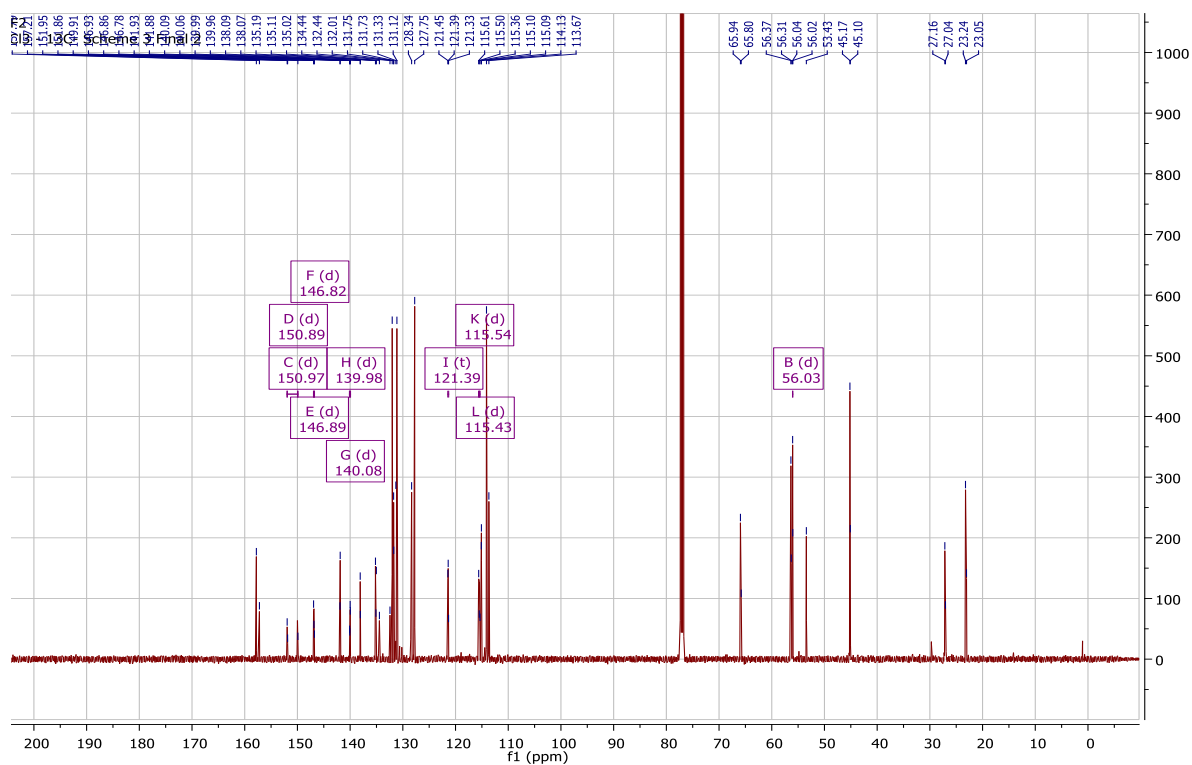

**E/Z -1-(2-{4-[1-(4-Chlorophenyl)-2-(4-fluoro-3-methoxyphenyl)-propenyl]-phenoxy}-ethyl)-pyrrolidine  
(23)**

30-Nov-2018

AV44 Sm (SG, 2x2)

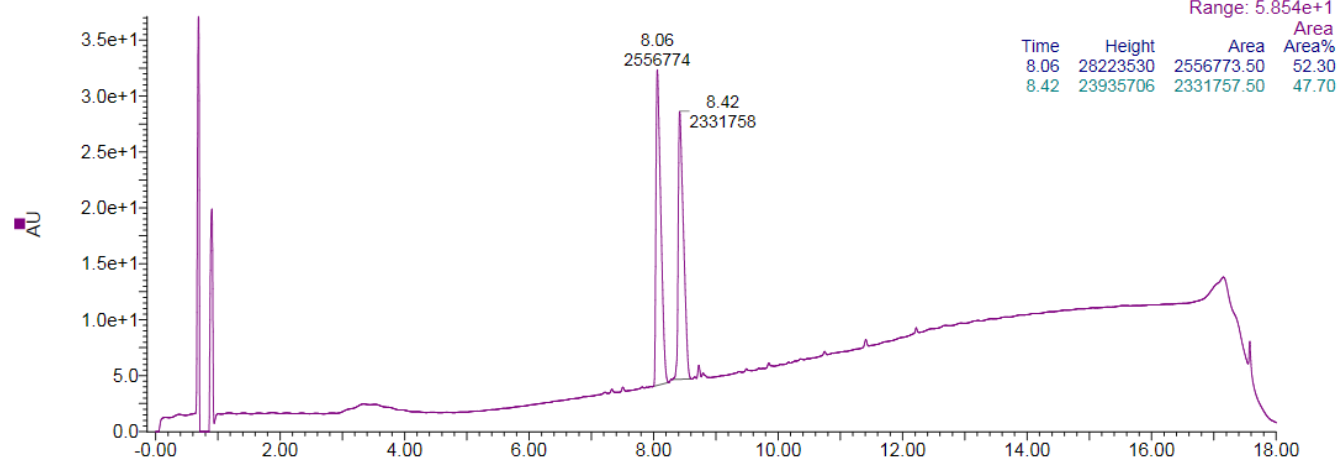

30-Nov-2018 13:28:27

AV44 505 (8.518) Cm (500:514)

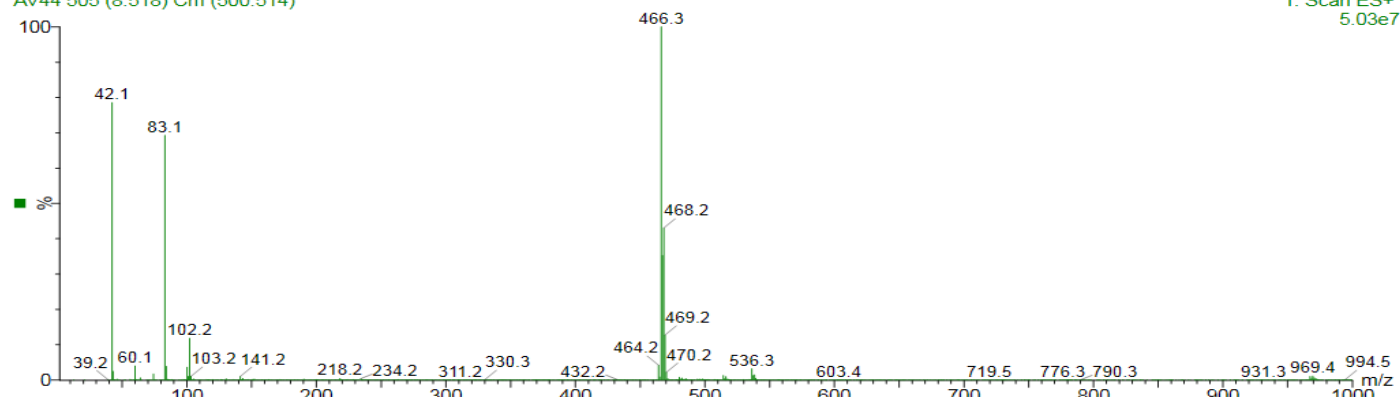



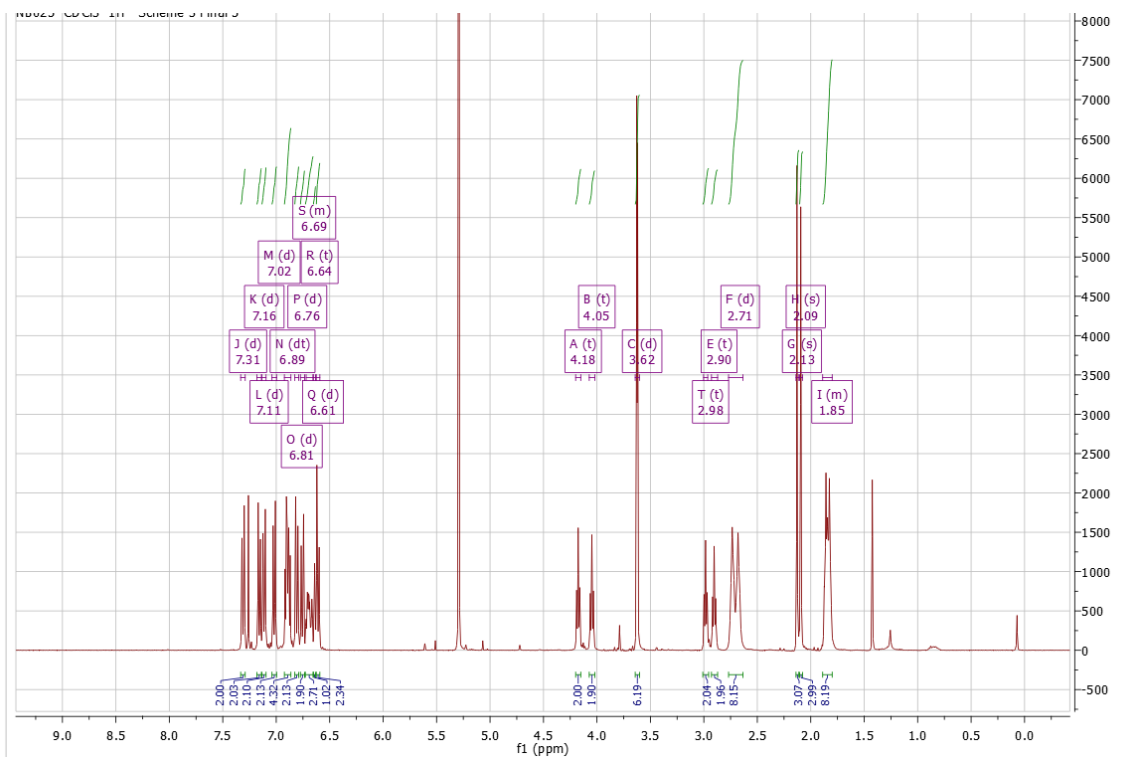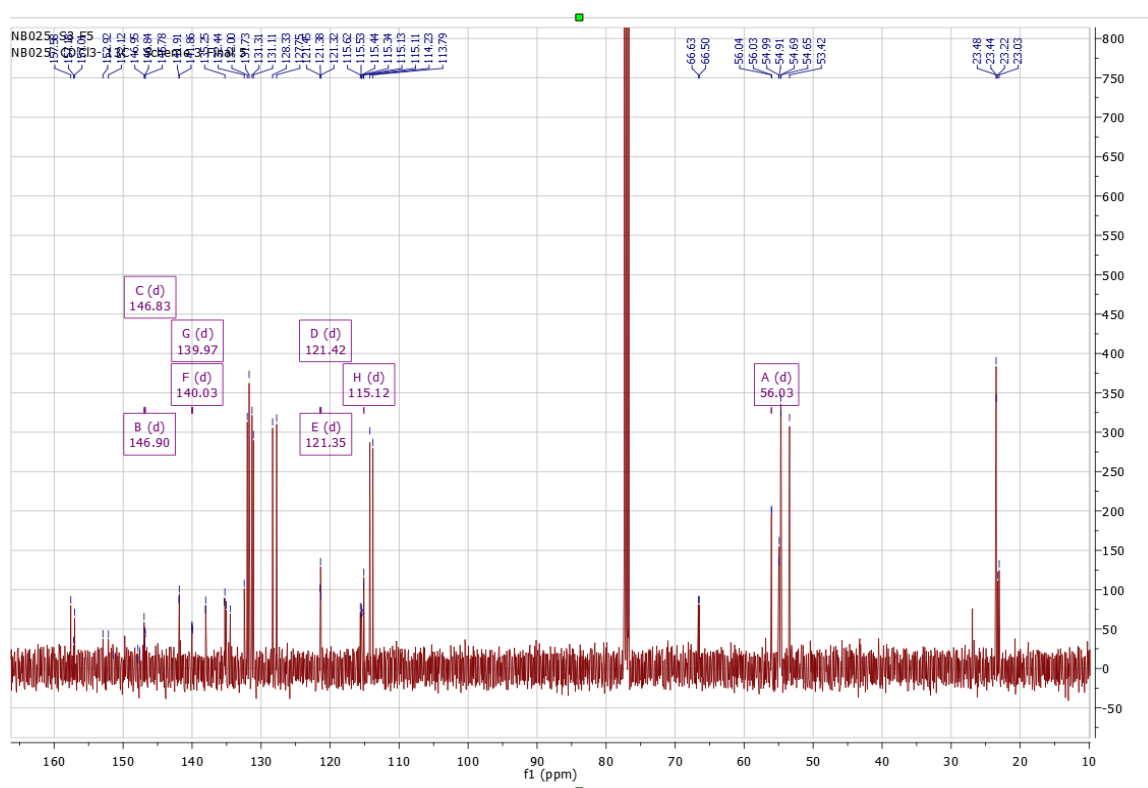

***E/Z*-4-(2-{4-[1-(4-Chlorophenyl)-2-(4-fluoro-3-methoxyphenyl)-propenyl]-phenoxy}ethyl)-morpholine  
(25)**

27-Nov-2018

AV42 Sm (SG, 2x2)

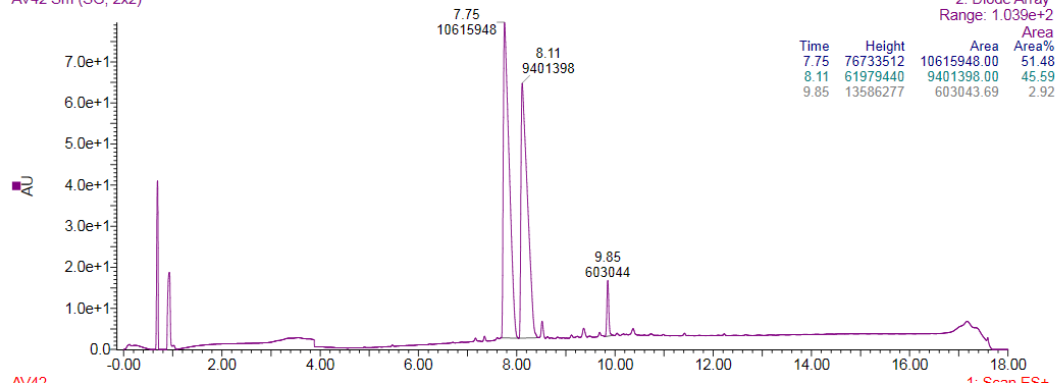

27-Nov-2018 16:48:10

AV42 486 (8.198) Cm (480:499)

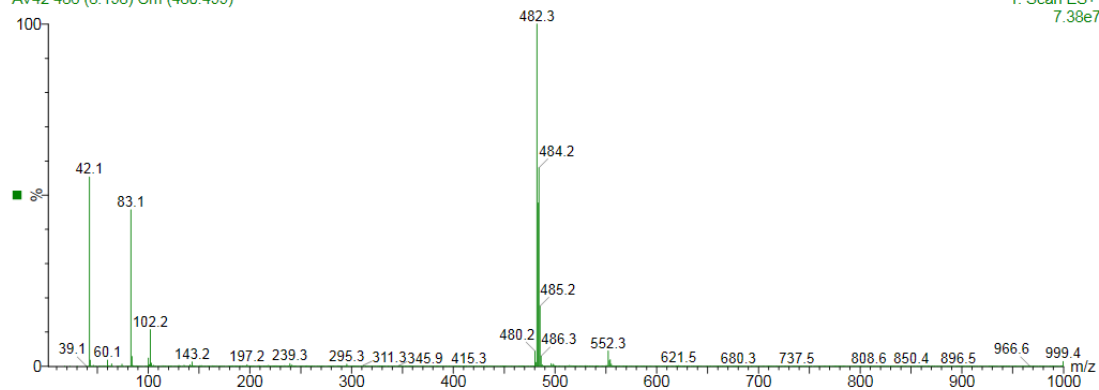

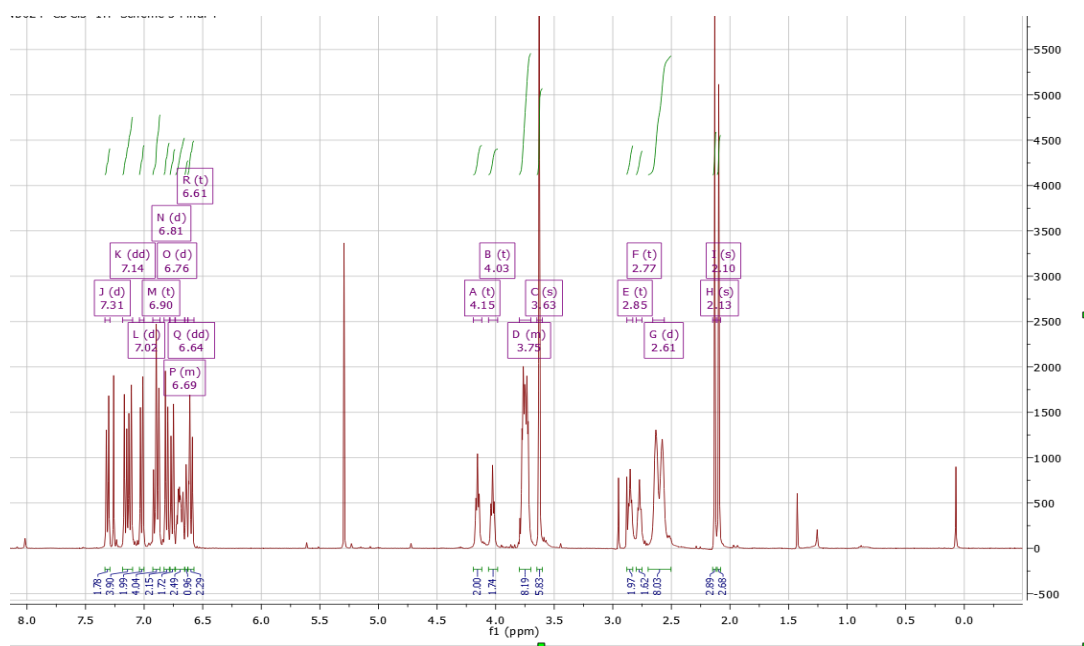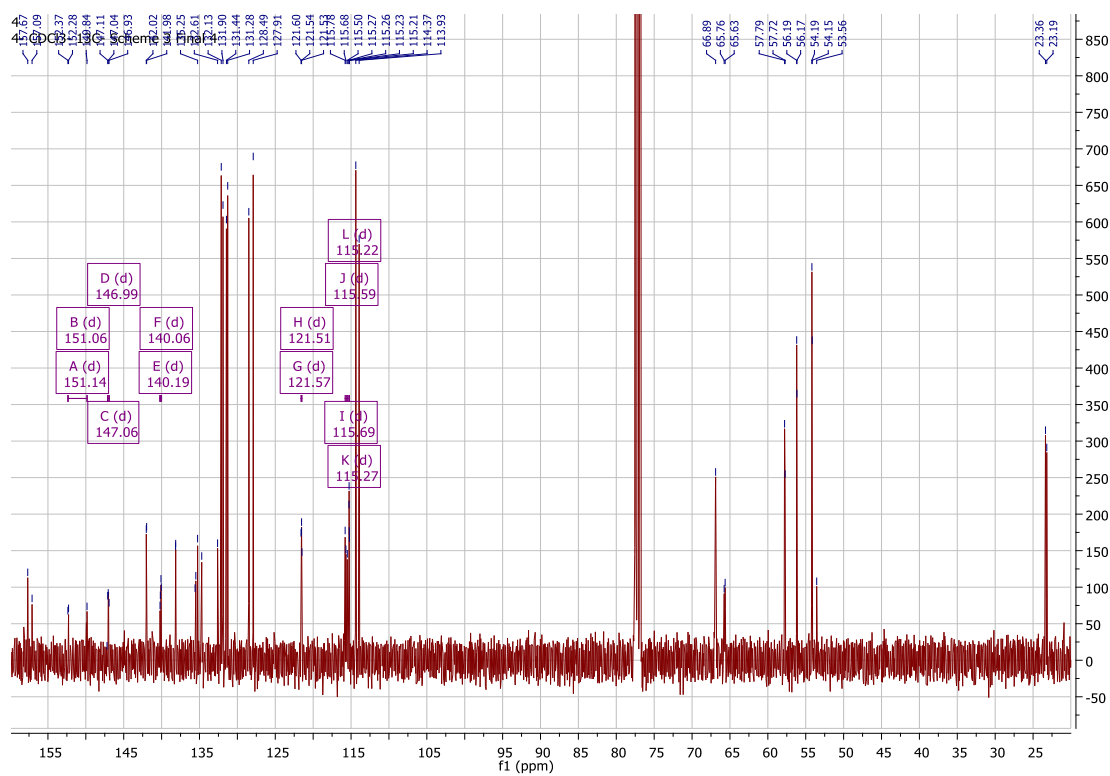

*E/Z*-2-{4-[1-(4-Chlorophenyl)-2-(4-fluoro-3-methoxyphenyl)-propenyl]-phenoxy}ethyl)-dimethyl-amine (27)

03-Dec-2018  
AV48 Sm (SG, 2x2)

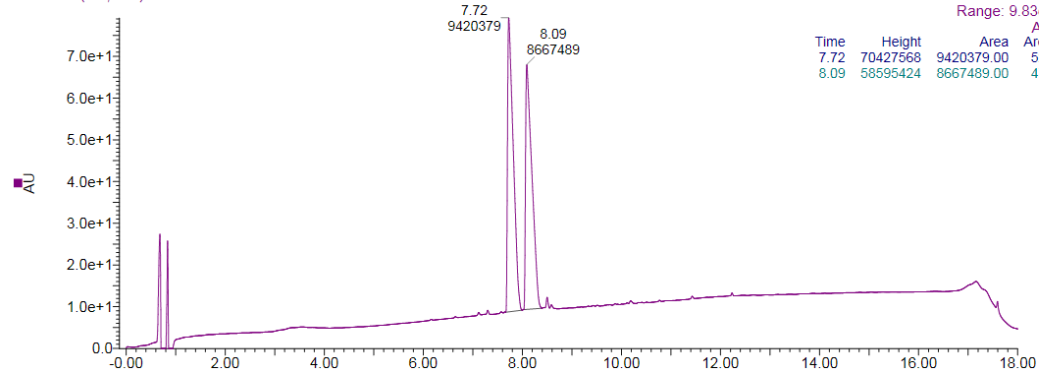

03-Dec-2018 09:36:41  
AV48 485 (8.181) Cm (481:495)

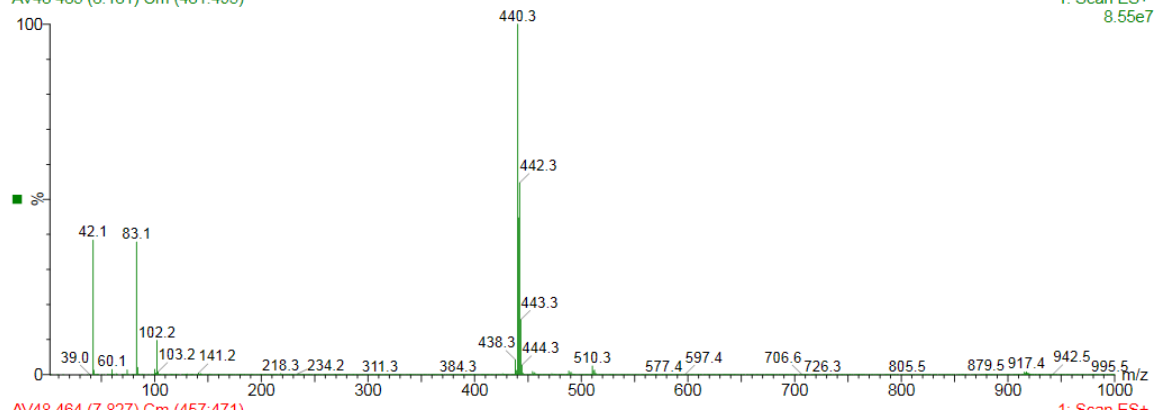

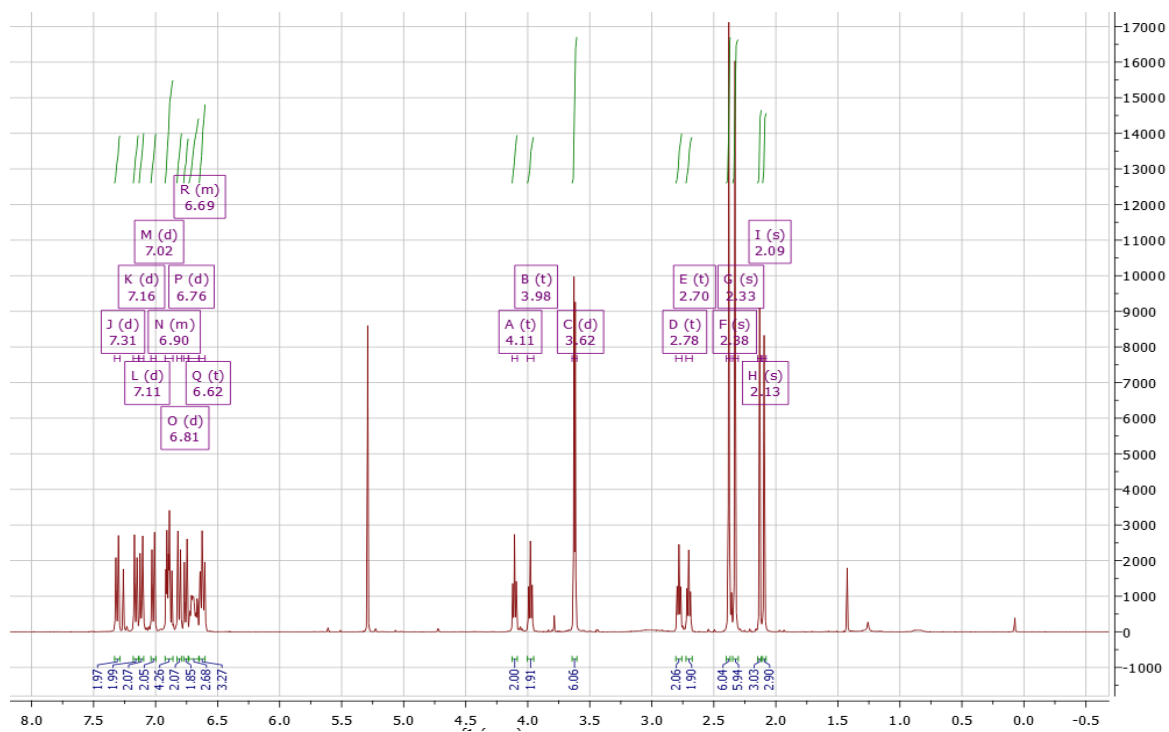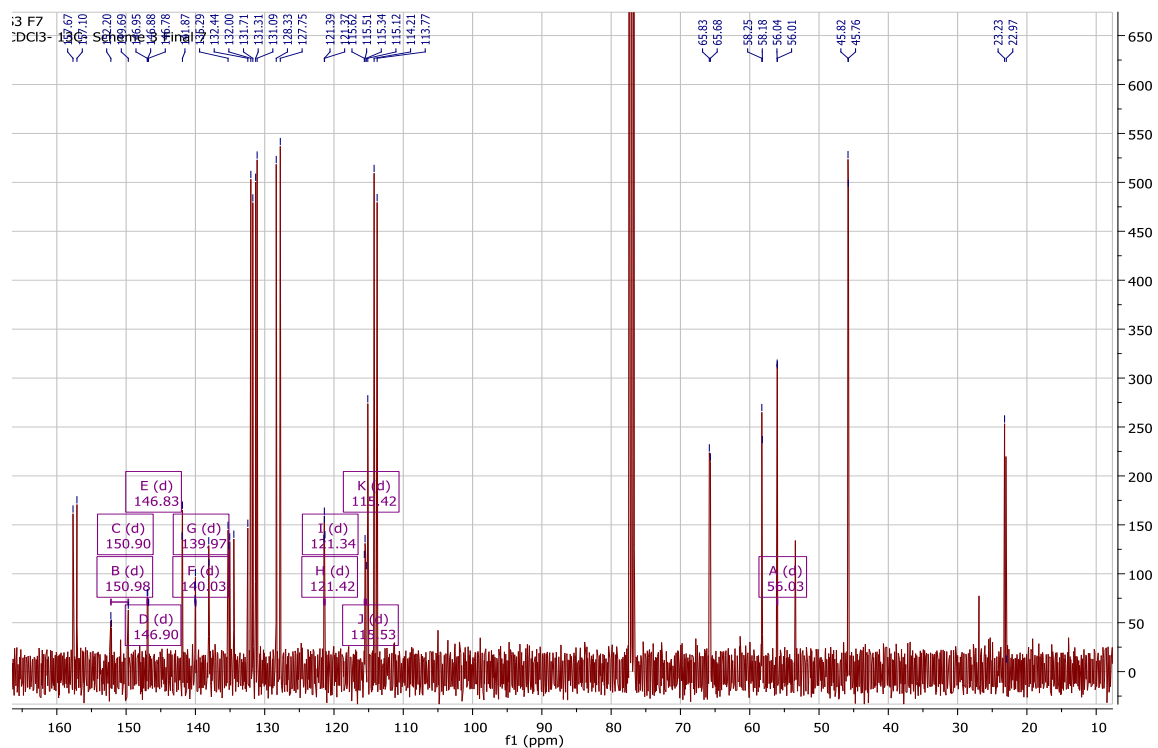

*E/Z*-(2-{4-[1-(4-Chlorophenyl)-2-(4-fluoro-3-methoxyphenyl)-propenyl]-phenoxy}-ethyl)-diethyl-amine (28).

26-Nov-2018  
AV40 Sm (SG, 2x2)

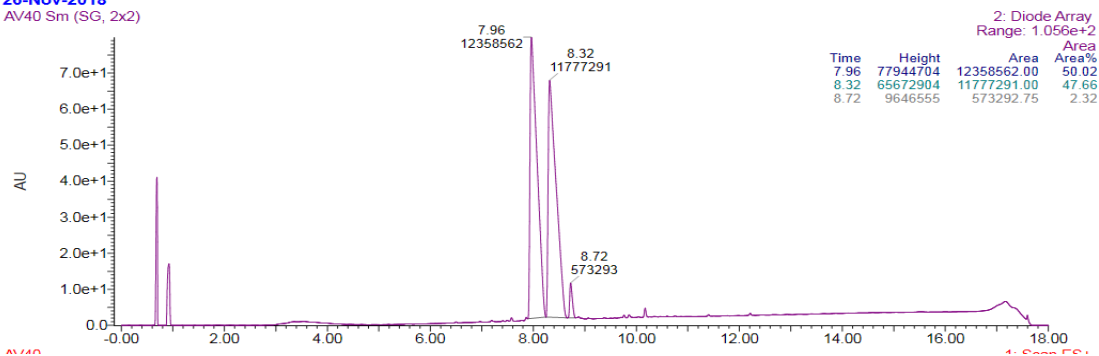

26-Nov-2018 17:13:43  
AV40 498 (8.400) Cm (491:513)

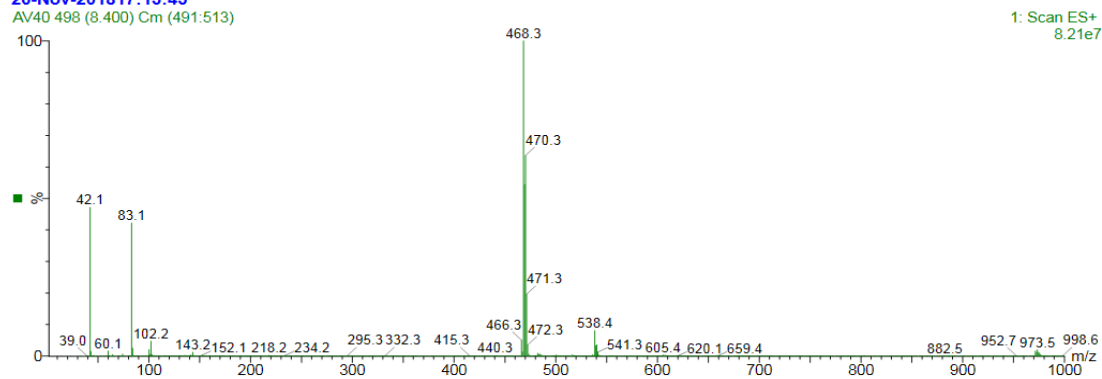

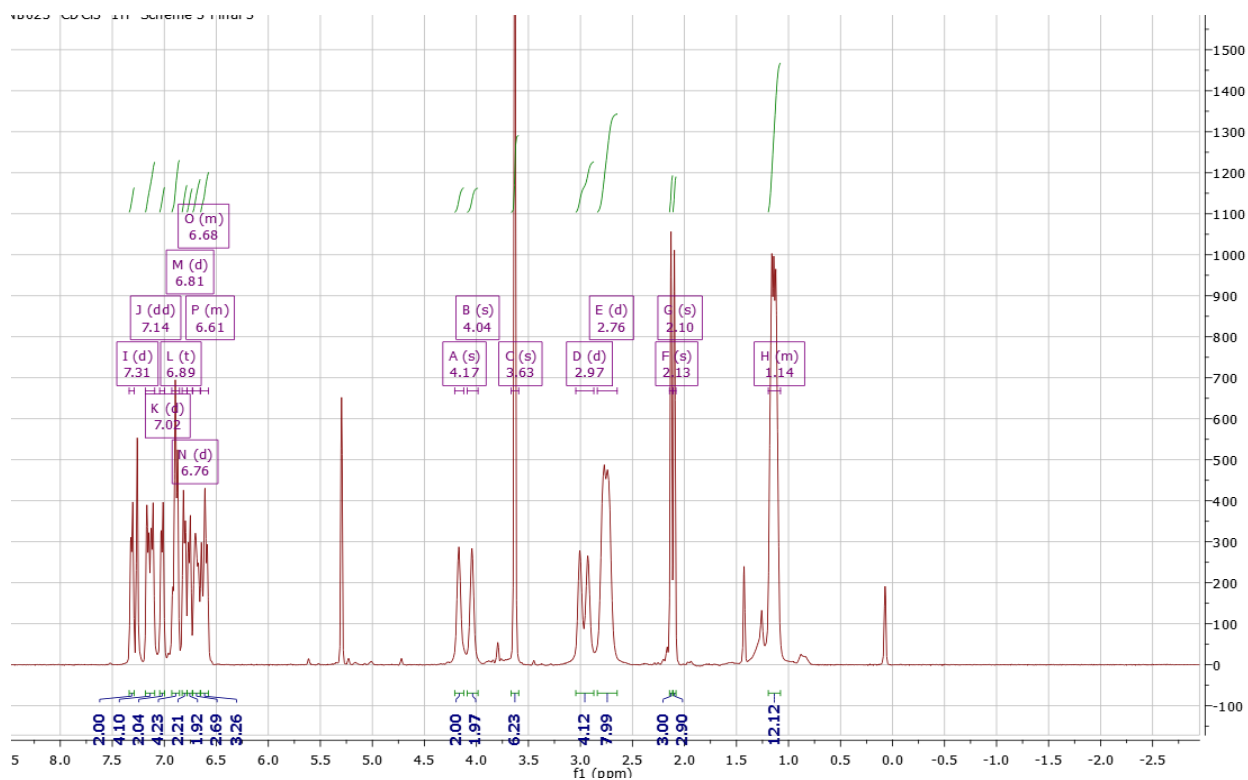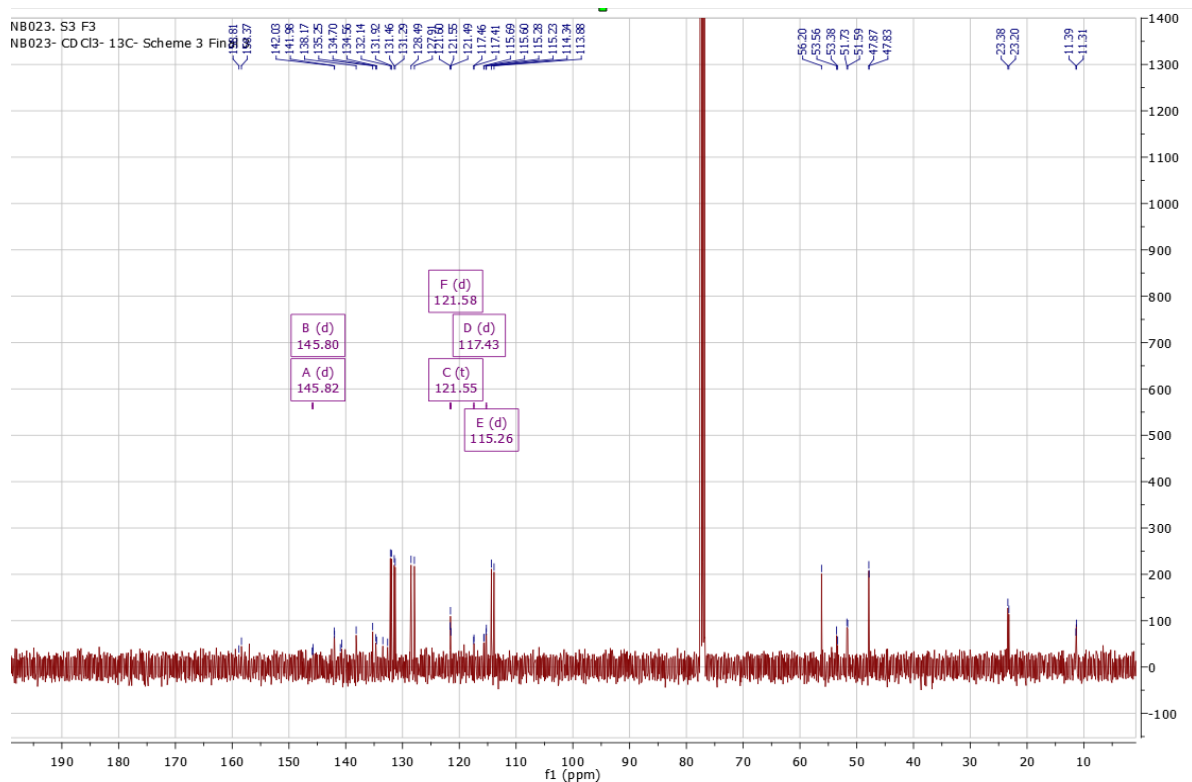

2. Dose response curves for to determine EC<sub>50</sub> values (agonistic activity) of selected compounds in YES assay, results of AlkP and uterotrophic assays

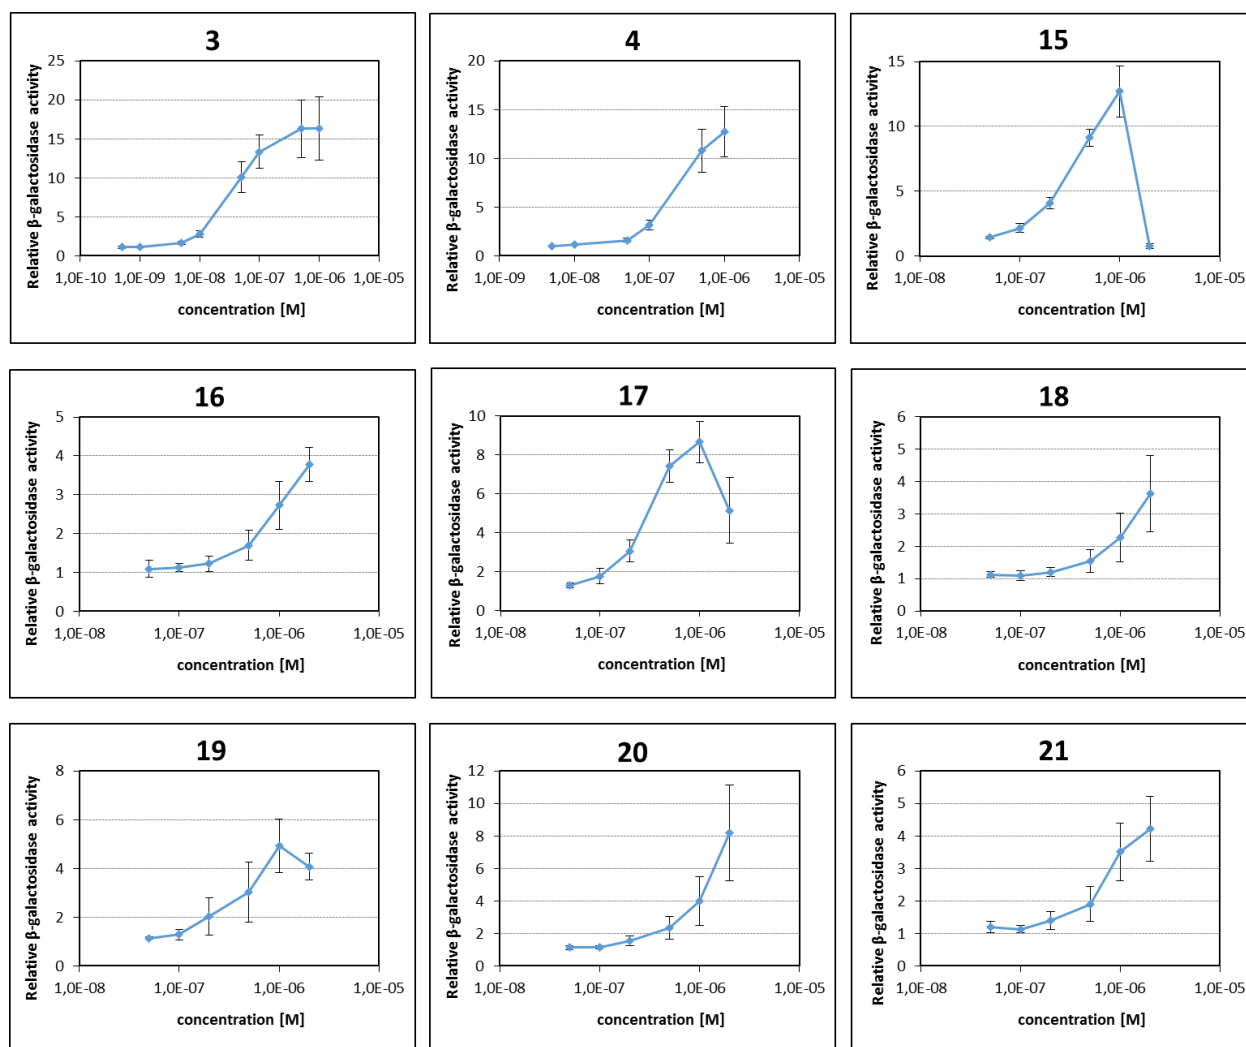

**Figure S1:** Relative  $\beta$ -galactosidase activity of selected compounds after two days treatment in YES assay. DMSO was used as solvent control and set to 1, mean  $\pm$  SD were calculated by three independent experiments.



**Table S1:** Relative Alkaline phosphatase activity (AlkP) after an incubation of 72 h in Ishikawa cells, compounds are tested at a concentration of 1  $\mu$ M. DMSO was used as solvent control and set to 1, mean  $\pm$  SD were calculated by three independent experiments.

| Code  | Relative AlkP activity                                                                                   |
|-------|----------------------------------------------------------------------------------------------------------|
|       | Mean $\pm$ SD                                                                                            |
| 3     | 1.13 $\pm$ 0.43                                                                                          |
| 4     | 1.10 $\pm$ 0.39                                                                                          |
| 5     | 1.08 $\pm$ 0.33                                                                                          |
| 6     | 2.55 $\pm$ 1.35                                                                                          |
| 7     | 2.55 $\pm$ 1.80                                                                                          |
| 8     | 1.16 $\pm$ 0.15                                                                                          |
| 9     | 2.94 $\pm$ 1.29                                                                                          |
| 10    | 2.55 $\pm$ 1.80                                                                                          |
| 11    | 2.56 $\pm$ 0.83                                                                                          |
| 12    | 1.43 $\pm$ 0.07                                                                                          |
| 13    | 3.74 $\pm$ 2.05                                                                                          |
| 14    | 6.58 $\pm$ 2.24                                                                                          |
| 15    | 0.86 $\pm$ 0.12                                                                                          |
| 16    | 0.98 $\pm$ 0.53                                                                                          |
| 17    | 1.31 $\pm$ 0.41                                                                                          |
| 18    | 1.01 $\pm$ 0.24                                                                                          |
| 19    | 1.71 $\pm$ 0.08                                                                                          |
| 20    | 1.12 $\pm$ 0.46                                                                                          |
| 21    | 0.90 $\pm$ 0.13                                                                                          |
| 22-28 | Compounds were not<br>selected for AlkP assay<br>because of their low estrogenic effects<br>in YES assay |

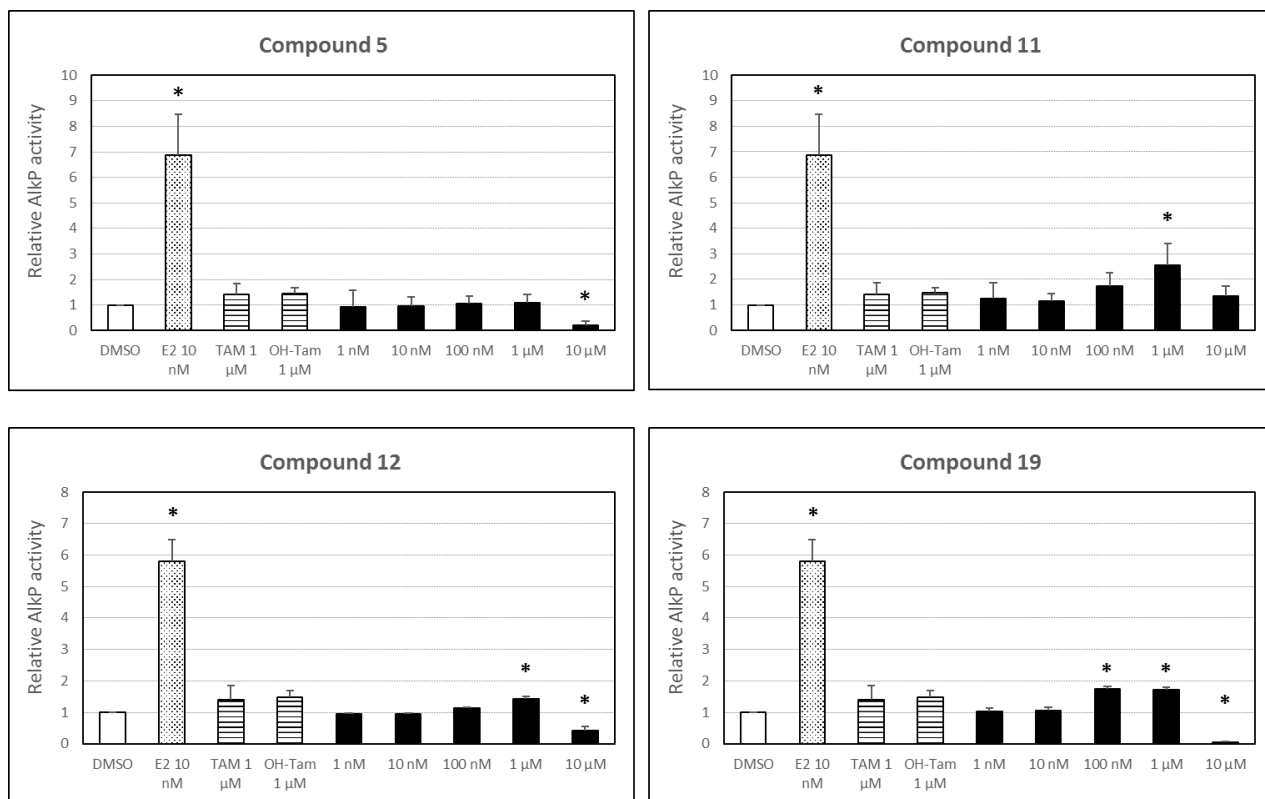

**Figure S2:** Relative Alkaline phosphatase activity (AlkP) for compounds **5**, **11**, **12**, **19** after three days treatment in human endometrial adenocarcinoma Ishikawa cells. DMSO was used as solvent control and set to 1, mean  $\pm$  SD were calculated by three independent experiments. Tam and 4-OH-Tam (1  $\mu$ M) were tested for comparison. \*  $p < 0.05$  versus DMSO control (Tukey test)

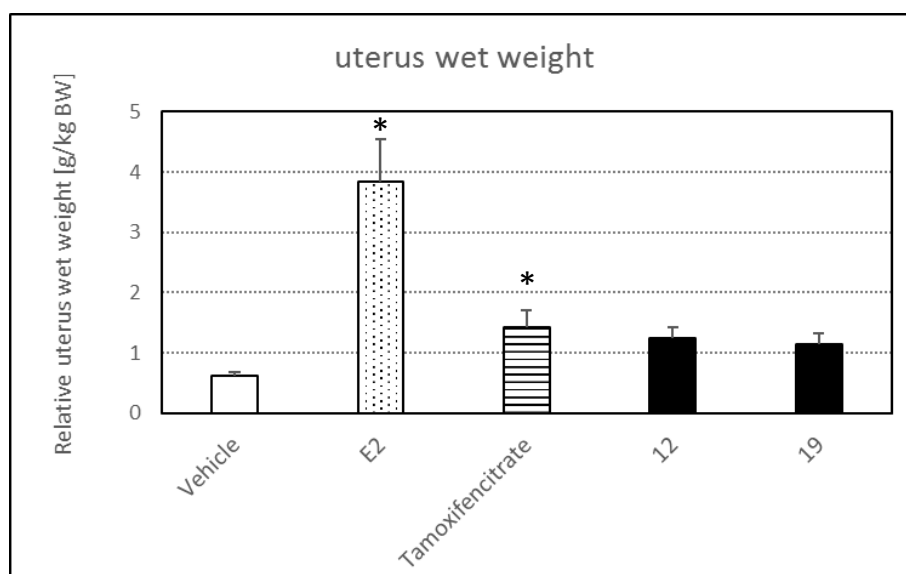

**Figure S3:** Relative uterus wet weight following a three days treatment of ovariectomized rats (vehicle = control) with E2 (10  $\mu$ g/kg BW/ day), TAM (10 mg/kg BW/ day), compound **12** (10 mg/kg BW/ day), and compound **19** (10 mg/kg BW/ day). \*  $p < 0.05$  versus control (Tukey test)

**Figure S4:** DTP log (GI<sub>50</sub>, TGI, LC<sub>50</sub>)  $\mu$ M TAM (NSC 180973)

### GI<sub>50</sub> Mean Graph for Compound 180973

NCI Cancer Screen Current Data

Average GI<sub>50</sub> over all cell lines is 3.94E-6 M

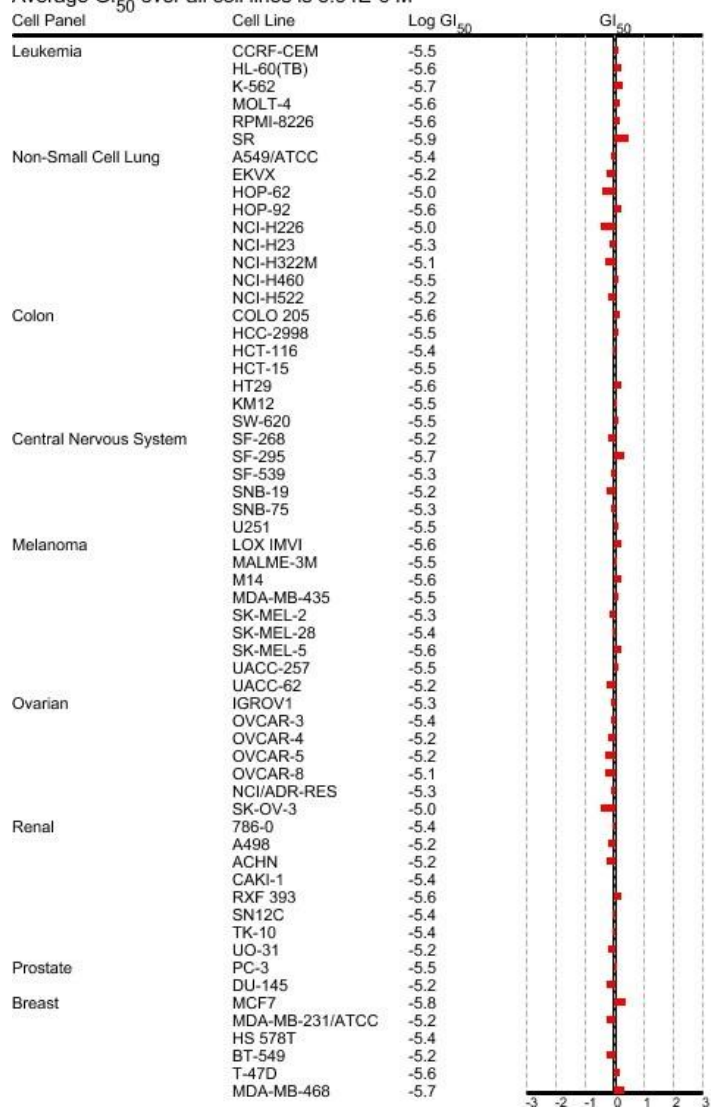

Figure S5: Dose response curves compound 11 on different subpanels ( $\mu\text{M}$ )

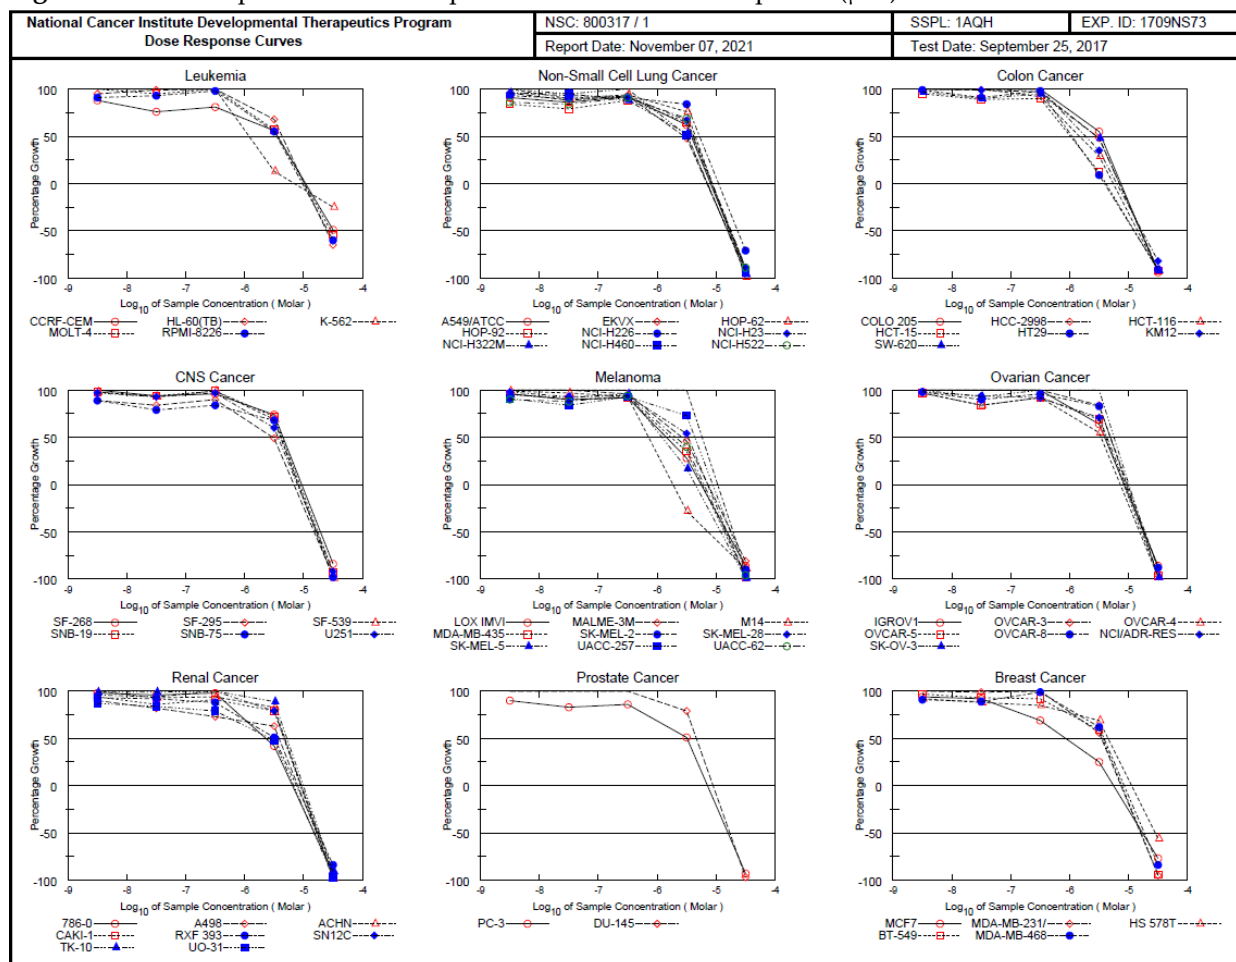

Figure S6: Dose response curves compound 12 on different subpanels ( $\mu\text{M}$ )

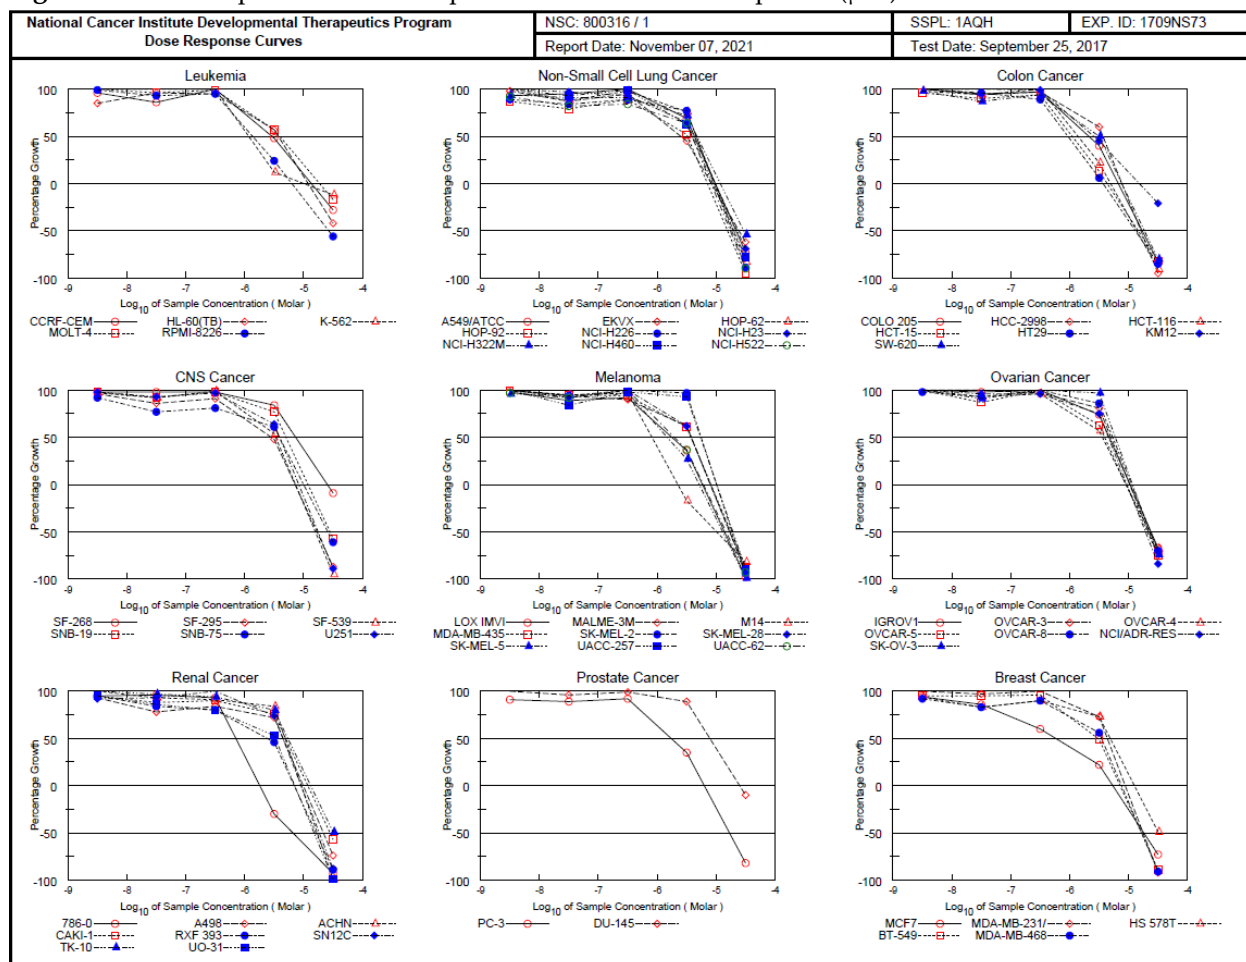

Figure S7: Dose response curves compound 16 on different subpanels ( $\mu\text{M}$ )

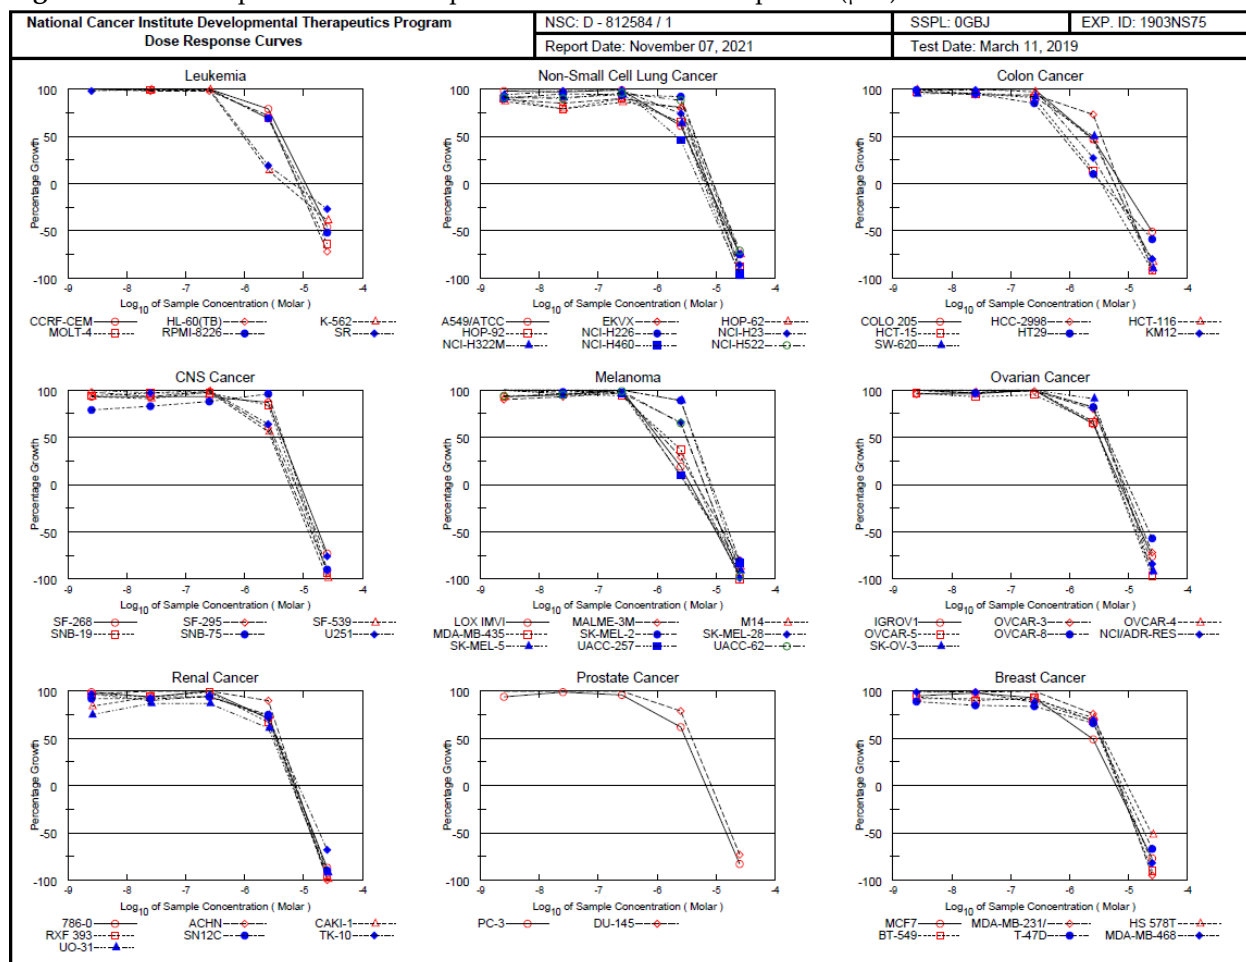

Figure S8: Dose response curves compound 17 on different subpanels ( $\mu\text{M}$ )

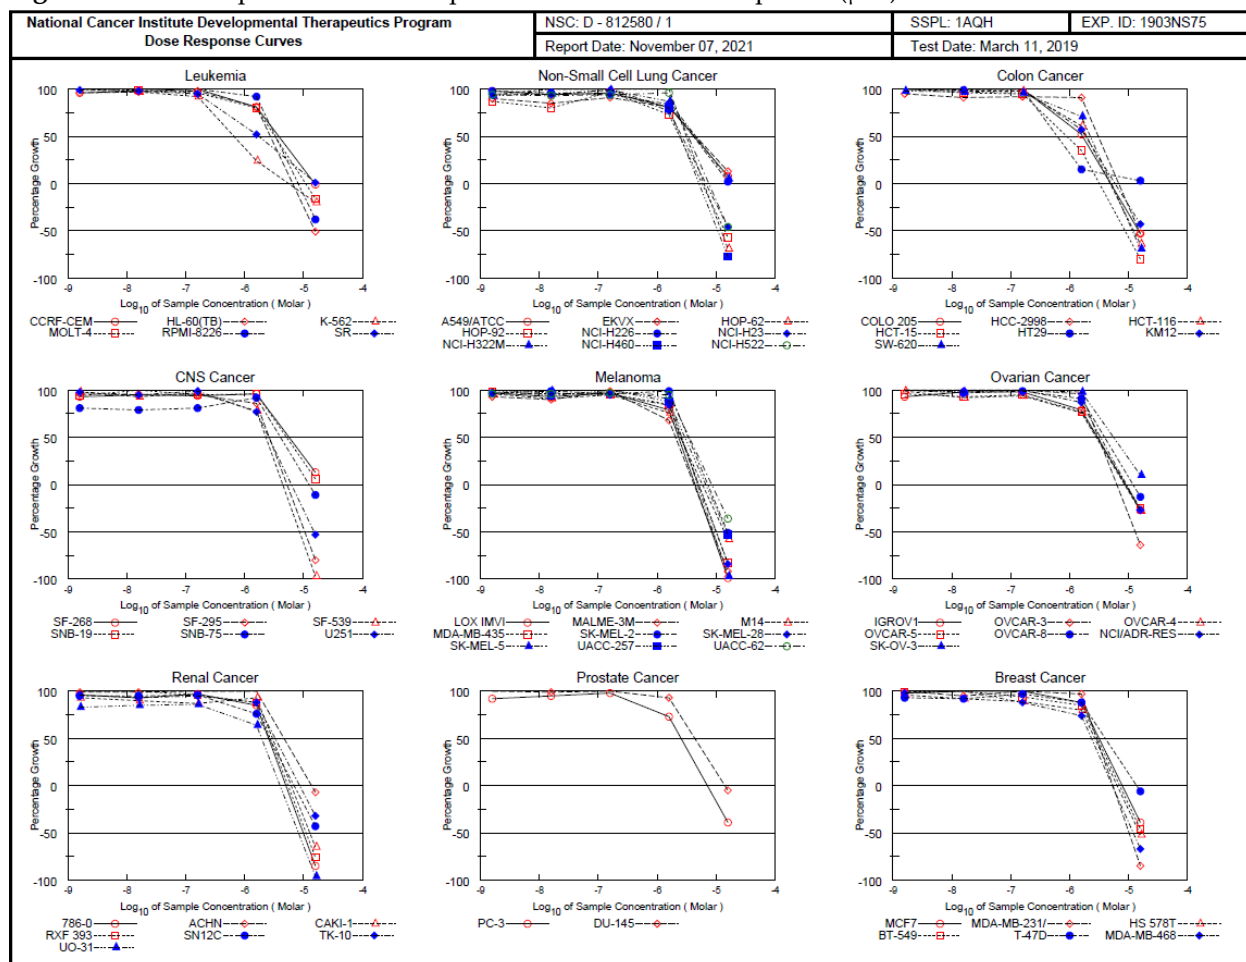



**Figure S9:** Dose response curves compound 19 on different subpanels ( $\mu\text{M}$ )

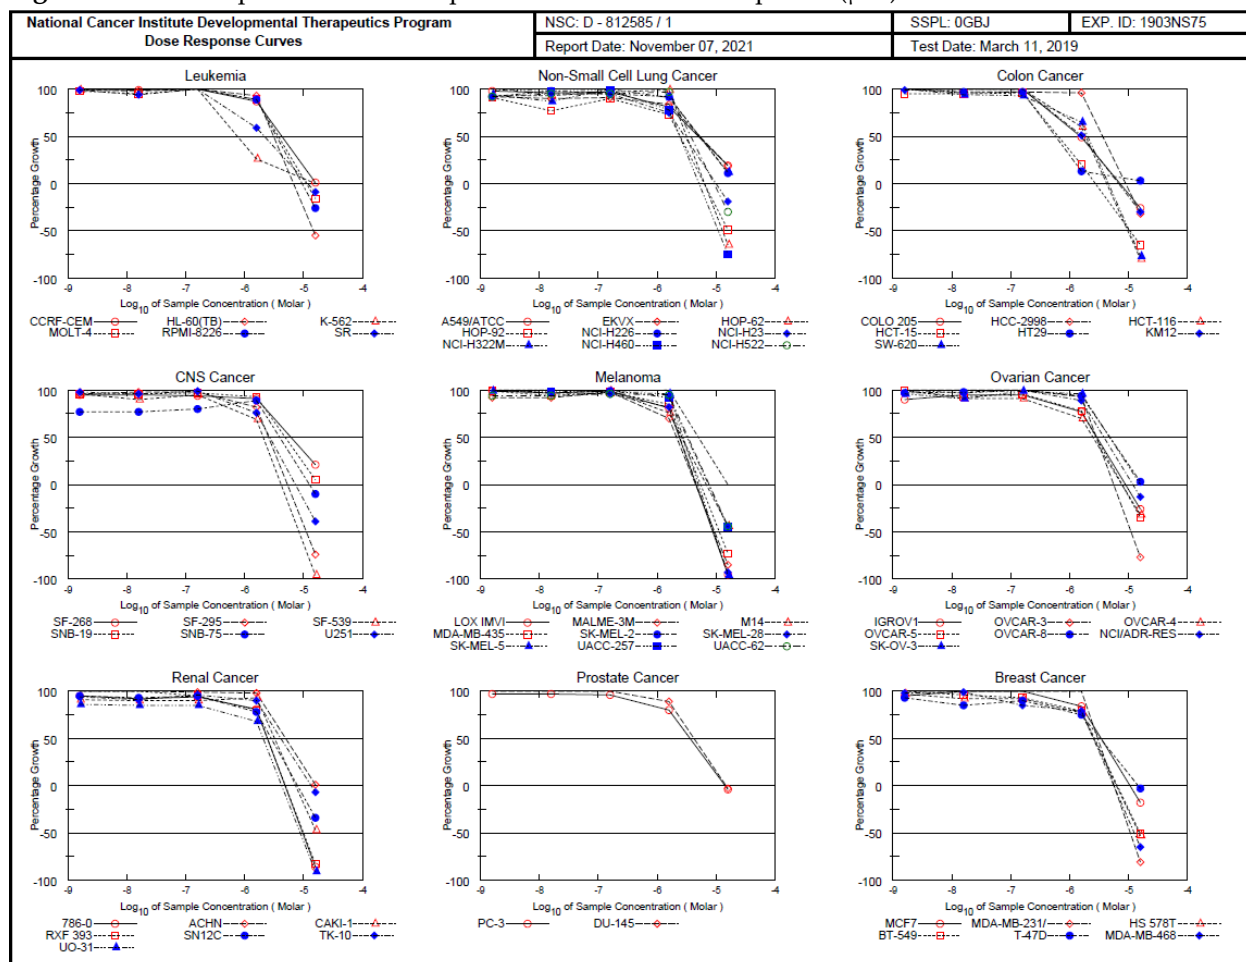

**Figure S10:** Dose response curves compound 19 on different subpanels ( $\mu\text{M}$ )

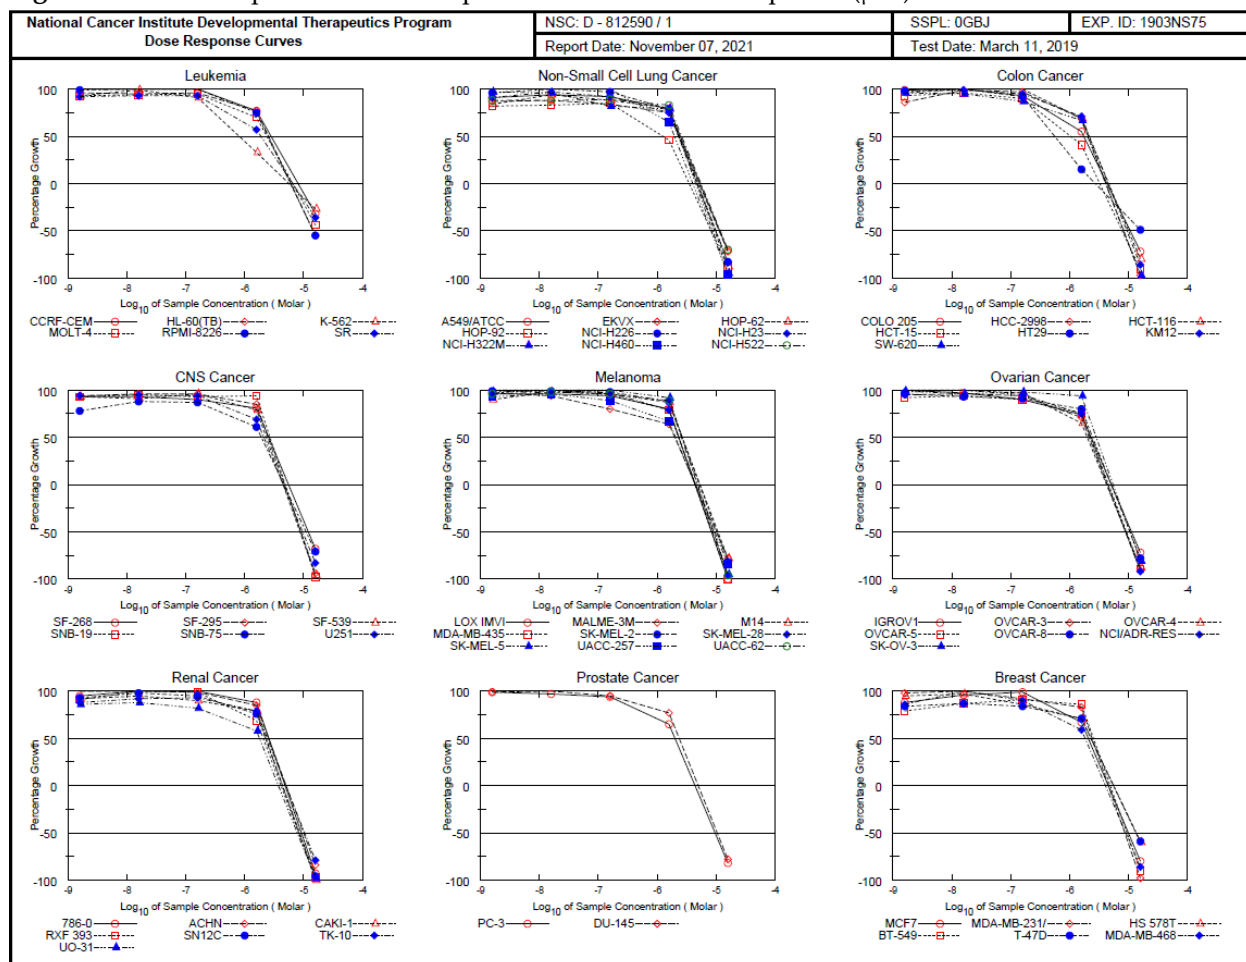

Supplement: s1 [file s1]
